# Supplementary material
Source: PubMed Central journal article supplement (PMC4084758)
Supplement: NIHMS487263-supplement-01.pdf [file NIHMS487263-supplement-01.pdf]

Supporting Information for: “A C—H oxidation approach for streamlining synthesis of chiral polyoxygenated motifs ”

Dustin J. Covell and M. Christina White

**General Information:** The following commercially obtained reagents were used as received; Pd(OAc)<sub>2</sub>, (Alfa Aesar), (1R,2R)-(-)-[1,2-Cyclohexanediamino-N,N'-bis(3,5-di-*t*-butylsalicylidene)]Chromium(III)Cl, (1S,2S)-(+)-[1,2-Cyclohexanediamino-N,N'-bis(3,5-di-*t*-butylsalicylidene)]Chromium(III)Cl (Aldrich), 5-hexene-1-ol (Aldrich), methyl 10-undecenoate (Aldrich), benzyl bromide (Aldrich), phenyl boronic acid (Aldrich), Novozyme 435, polymer supported (Aldrich), tetrabutylammonium iodide (Aldrich), sodium hydride (95%) (Aldrich), iron ferricyanide (Strem chemicals), potassium carbonate (Fisher), sodium bicarbonate (Fisher), methanesulfonamide (Aldrich), (DHQD)<sub>2</sub>PHAL (Aldrich), hexenoic acid methyl ester (TCI), 2-(2-bromoethyl)-1,3-dioxane (TCI), benzoquinone (Aldrich), acetic acid (Fisher). Lewis acid **2** was prepared from commercially available (1R,2R)-(-)-[1,2-Cyclohexanediamino-N,N'-bis(3,5-di-*t*-butylsalicylidene)]Chromium(III) Chloride as previously described.<sup>i</sup> Pd(OAc)<sub>2</sub> was stored in a glove box under an argon atmosphere and weighed out in the air prior to use. Commercially available “White Catalyst” (1,2-Bis(phenylsulfinyl)ethane palladium(II) acetate)(**1**) from Aldrich was found to be equivalent to that prepared freshly by the published procedure.<sup>ii</sup> Solvents 1,4-dioxane, diethyl ether (Et<sub>2</sub>O), tetrahydrofuran (THF), and methylene chloride (CH<sub>2</sub>Cl<sub>2</sub>) were purified prior to use by passage through a bed of activated alumina (Glass Contour, Laguna Beach, California). Ethyl acetate (EtOAc) (Sure/Seal) was obtained from Sigma-Aldrich and used as received. All allylic oxidation reactions were run under air. Achiral gas chromatographic (GC) analyses were performed on Agilent Technologies 6890N Series instrument equipped with FID detectors using a HP-5 (5%-Phenyl)-methylpolysiloxane column (30m, 0.32mm, 0.25μm). Chiral gas chromatographic (GC) analyses were performed on an Agilent Technologies 5890A Series instrument equipped with an FID detector using a J&W Scientific β-cyclodextrin column (30m, 0.25mm, 0.25μm). HPLC analysis was performed on an Agilent Technologies 1100 HPLC system with a model 1100 Quaternary Pump, Diode Array Detector, Thermostat, and Autosampler. Thin-layer chromatography (TLC) was conducted with E. Merck silica gel 60 F254 precoated plates (0.25 mm) and visualized with UV, potassium permanganate, and ceric ammonium molybdate staining. Flash column chromatography was performed as described by Still et al.<sup>iii</sup> using EM reagent silica gel 60 (230-400 mesh). <sup>1</sup>H NMR spectra were recorded on a Varian Unity 400 (400 MHz) or a Varian Unity 500 (500 MHz), or a Varian Unity Inova 500NB spectrometer and are reported in ppm using solvent as an internal standard (CDCl<sub>3</sub> at 7.26 ppm). Data reported as: s = singlet, d = doublet, t = triplet, q = quartet, m = multiplet, b = broad; coupling constant(s) in Hz; integration. Proton-decoupled <sup>13</sup>C- NMR spectra were recorded on a Varian Unity-500 (125 MHz) spectrometer and are reported in ppm using solvent as an internal standard (CDCl<sub>3</sub> at 77.0 ppm). IR spectra were recorded as thin films on NaCl plates on a Perkin-Elmer Spectrum BX and are reported in frequency of absorption (cm<sup>-1</sup>). High-resolution mass spectra were obtained at the University of Illinois Mass Spectrometry Laboratory.

**General Procedure for Asymmetric Branched Allylic Acetoxylation:** A vial (8 mL borosilicate) was charged with the following: 1,2-Bis(phenylsulfinyl)ethane palladium(II) acetate(**1**) (10 mol%, 0.10 mmol, 50 mg); (1R,2R)-(-)-[1,2-Cyclohexanediamino-N,N'-bis(3,5-di-*t*-butylsalicylidene)]Chromium(III)F(*R,R*-**2**) (10 mol%, 0.10 mmol, 61.6 mg), 1,4-

benzoquinone (2 equiv., 2.0 mmol, 216 mg), an activated 4Å MS bead (~30 mg), and a Teflon® stir bar. A separate vial (2 mL, borosilicate) was charged with the following: substrate (1.0 mmol), AcOH (1.1 equiv., 63 µL), and EtOAc (200 µL). The liquids were transferred to the solids via pipette and the vial rinsed with EtOAc (3 x 100 µL). After carefully stirring for 48 hrs at room temperature, the reaction mixture was transferred to a separatory funnel with ~3 mL EtOAc and diluted with hexanes (200 mL). The organic layer was rinsed with sat. aq. NaHSO<sub>3</sub> (1 x 50 mL) and 5% aq. K<sub>2</sub>CO<sub>3</sub> (2 x 50 mL). *Caution should be taken when combining aqueous layers as carbon dioxide is evolved.* The combined aqueous layers were back extracted with hexanes (100 mL). The combined organic layers were dried (MgSO<sub>4</sub>), filtered, and reduced *in vacuo*. The resulting oil was re-dissolved in hexanes (50 mL) and extracted again with 5% aq. K<sub>2</sub>CO<sub>3</sub> (3 x 10 mL) to remove residual hydroquinone. The organic layer was again dried (MgSO<sub>4</sub>), filtered and reduced *in vacuo* to afford a clean mixture of allylic oxidation products and any unreacted starting material from which the B:L, yield, and conversions were determined (<sup>1</sup>H NMR). Unless otherwise noted, this material was taken forward without further purification, though each substrate was isolated at least once for characterization purposes. Reported yields and selectivities are an average of at least two runs. Enantiomeric excess was determined by chiral GC (β-cyclodextrin column), as compared to racemic standards generated through our standard branched oxidation chemistry. Slight variations in B:L ratios and ee's were noted based on batch of Cr catalyst.

**General Procedure for Cleavage of Allylic Acetates:** To a 25 mL flask containing crude allylic acetate (1 mmol, assumed) was added MeOH (5 mL, 0.2 M) and potassium carbonate (0.276 g, 2 mmol). The reaction was vigorously stirred and monitored via thin layer chromatography (TLC). Upon completion, the reaction was transferred to a separatory funnel with methylene chloride (50 mL). Water (15 mL) was added, and the aqueous layer was extracted with methylene chloride (3 x 50 mL). The combined organics were washed with brine (1 x 10 mL), then dried (MgSO<sub>4</sub>), filtered, and reduced *in vacuo*. Products were then purified by standard SiO<sub>2</sub> chromatography. While the branched and linear allylic alcohols were commonly separable, it was found that carrying them forward as a mixture had no detrimental effect as the subsequent resolution acylated the linear alcohol rapidly making its separation from branched alcohol trivial. Individual product yields and characterization are reported below.

**General Procedure for Resolution with Novozyme 435:** To a flame dried round bottom flask containing allylic alcohol to be resolved (1 equiv.) was added vinyl acetate (0.6M) and Novozyme 435 immobilized on polystyrene beads (33.3 mg/1 mmol). The reaction was stirred vigorously at room temperature for 36 hrs. Upon completion, the solid supported enzyme was removed via filtration. The solid support was rinsed thoroughly with diethyl ether and then the filtrate reduced *in vacuo* and purified via standard SiO<sub>2</sub> chromatography. Enantioselectivities were determined by chiral gas chromatographic analysis on the acetylated derivative of each isolated alcohol. It was found that the recovered solid supported enzyme could be used up to 5 times with little diminishment in activity. Individual yields and selectivities are reported below.

**General Procedure for Resolution with S. Carlsberg:** The active enzyme for resolution was prepared as previously described by Boren and co-workers.<sup>iv</sup> To a flame dried round bottom flask containing allylic alcohol to be resolved (1 equiv.) was added isopropenyl valerate<sup>v</sup> (1.5 equiv), active S. Carlsberg (36 mg/1 mmol), sodium carbonate (1 equiv.) and THF (0.5M). The

reaction was stirred vigorously at room temperature for 60 hrs. Upon completion, the enzyme was removed via filtration. The enzyme was rinsed thoroughly with diethyl ether and then the filtrate reduced *in vacuo* and purified via standard SiO<sub>2</sub> chromatography. Enantioselectivities were determined by chiral gas chromatographic analysis on the acetylated derivative of each isolated alcohol. Individual yields and selectivities are reported below.

---

<sup>i</sup> S. E. Schaus, J. Brånalt, E. N. Jacobsen. *J. Org. Chem.* **1998**, *63*, 403.

<sup>ii</sup> J. H. Delcamp, M. C. White, *J. Am. Chem. Soc.* **2006**, *128*, 15076.

<sup>iii</sup> W. C. Still, M. Kahn, A. Mitra, *J. Org. Chem.* **1978**, *43*, 2923.

<sup>iv</sup> L. Boren, B. Martin-Matute, Y. Xu, A. Cordova, and J.-E. Backvall; *Chemistry: A European Journal*, **2006**, *12*, 225-232.

<sup>v</sup> Y. F. Wang, J. J. Lalonde, M. Momongan, D. E. Bergbreiter, C. H. Wong *J. Am. Chem. Soc.* **1998**, *110*, 7200.

# 1-O-Benzyl-5-hexen-1-ol (7)

Pulse Sequence: s2pul

Solvent: CDCl<sub>3</sub>  
Ambient temperature  
File: DJC-7-7-1H  
INOVA-500 "sunds1"

Relax. delay 15.000 sec  
Pulse 90.0 degrees  
Acq. time 4.096 sec  
Width 8000.0 Hz  
Single scan  
OBSERVE H1, 500.0678136 MHz  
DATA PROCESSING  
Line broadening 0.3 Hz  
FT size 65536  
Total time 5 min, 5 sec

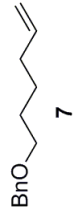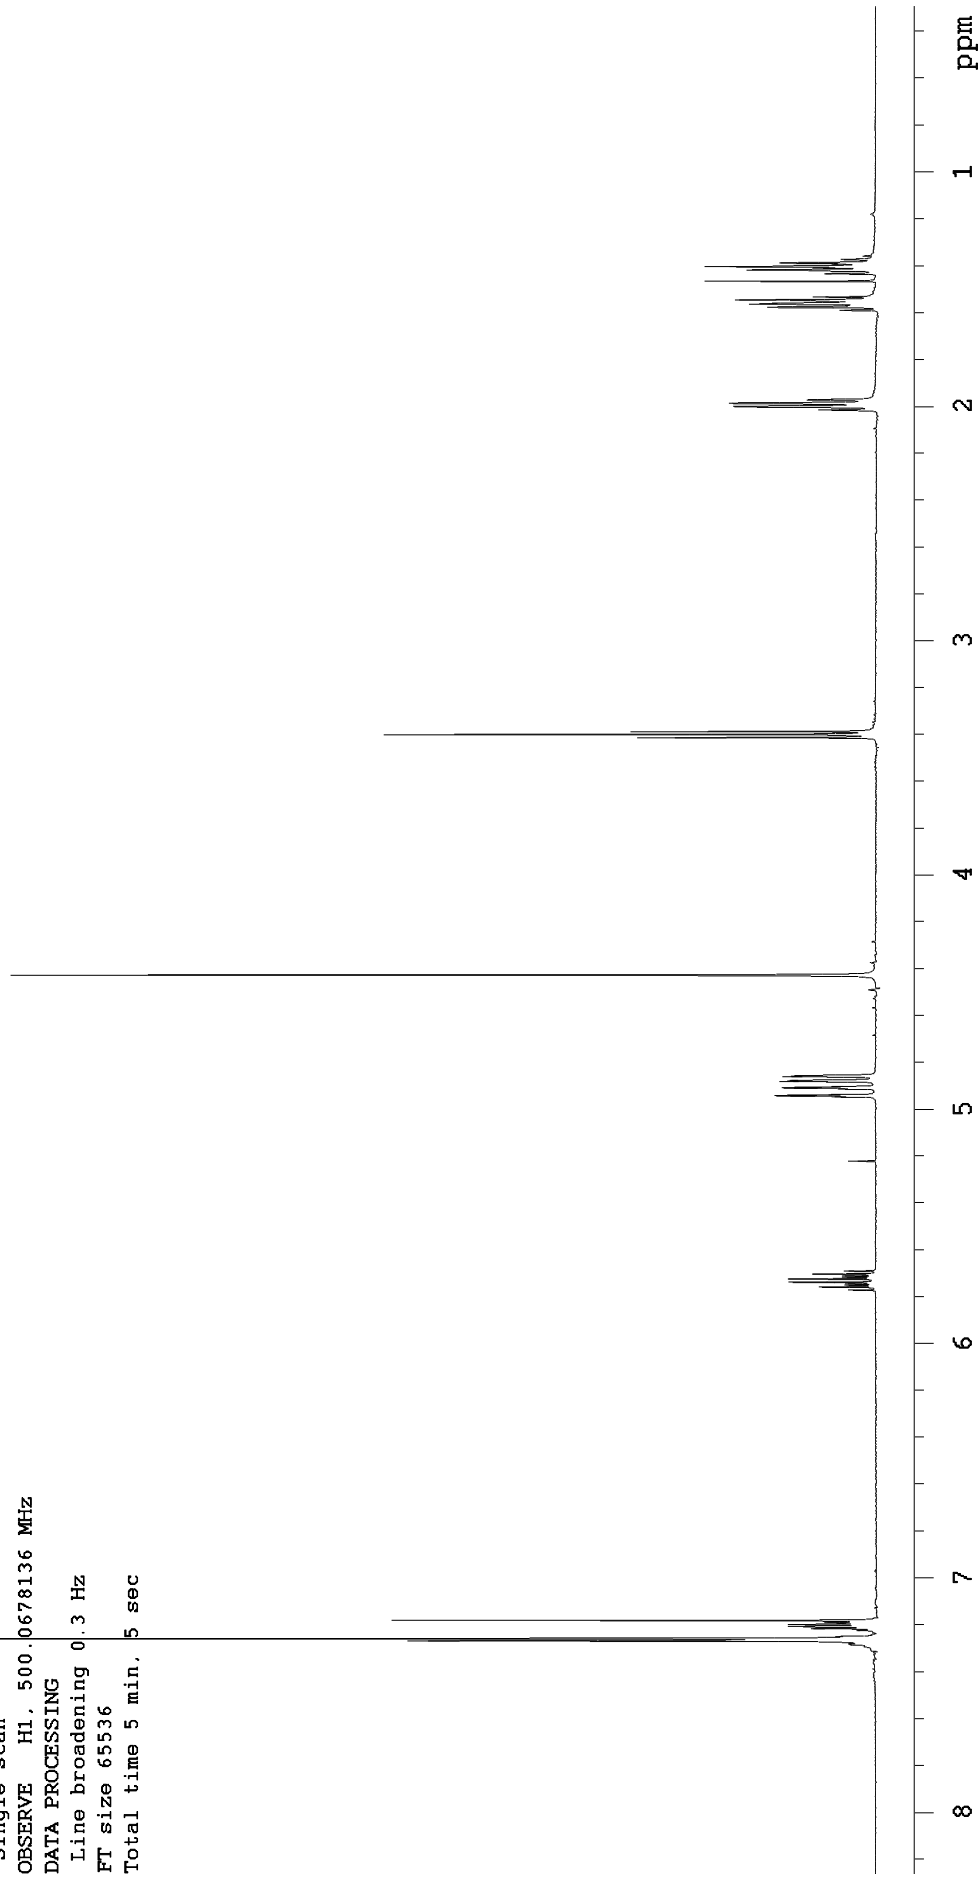

(-)-O-Benzyl-5-hexen-1-ol (7)

Pulse Sequence: s2pul

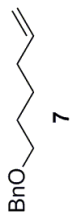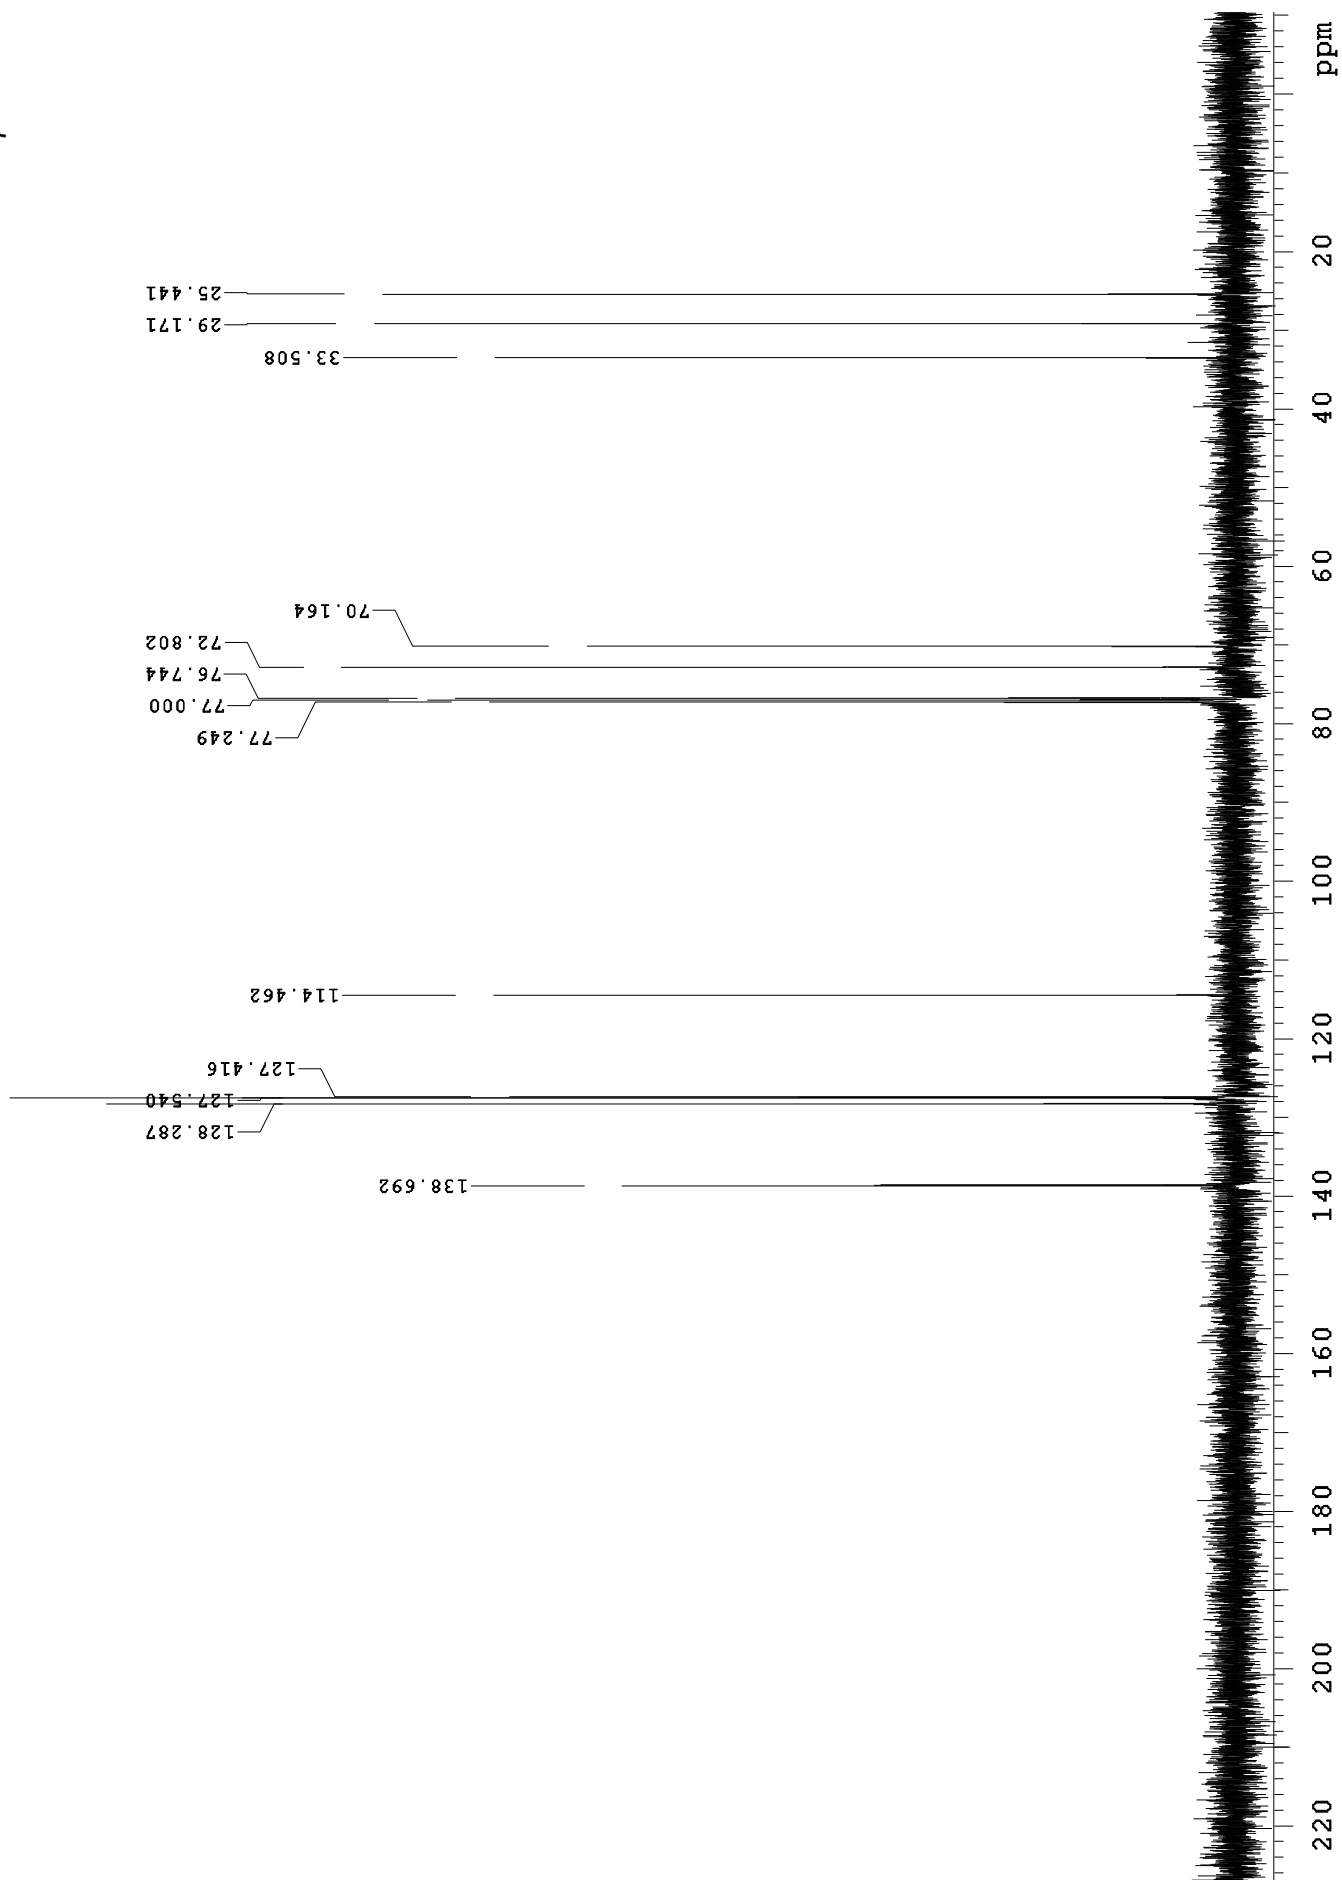

(4R)-1-O-Benzyl-4-acetoxy-5-hexen-1,4-diol (3-OAc)

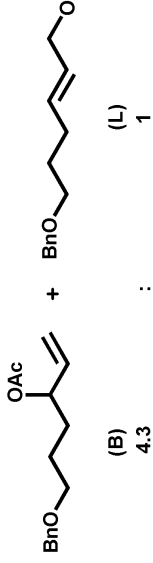

Pulse Sequence: s2pul

Solvent: CDCl<sub>3</sub>

Ambient temperature

File: DJC-4-301-1

INOVA-500 "sunds1"

Relax. delay 20.000 sec

Pulse 45.0 degrees

Acq. time 4.096 sec

Width 8000.0 Hz

4 repetitions

OBSERVE H1, 399.9486781 MHz

DATA PROCESSING

Line broadening 0.3 Hz

FT size 65536

Total time 1 min, 36 sec

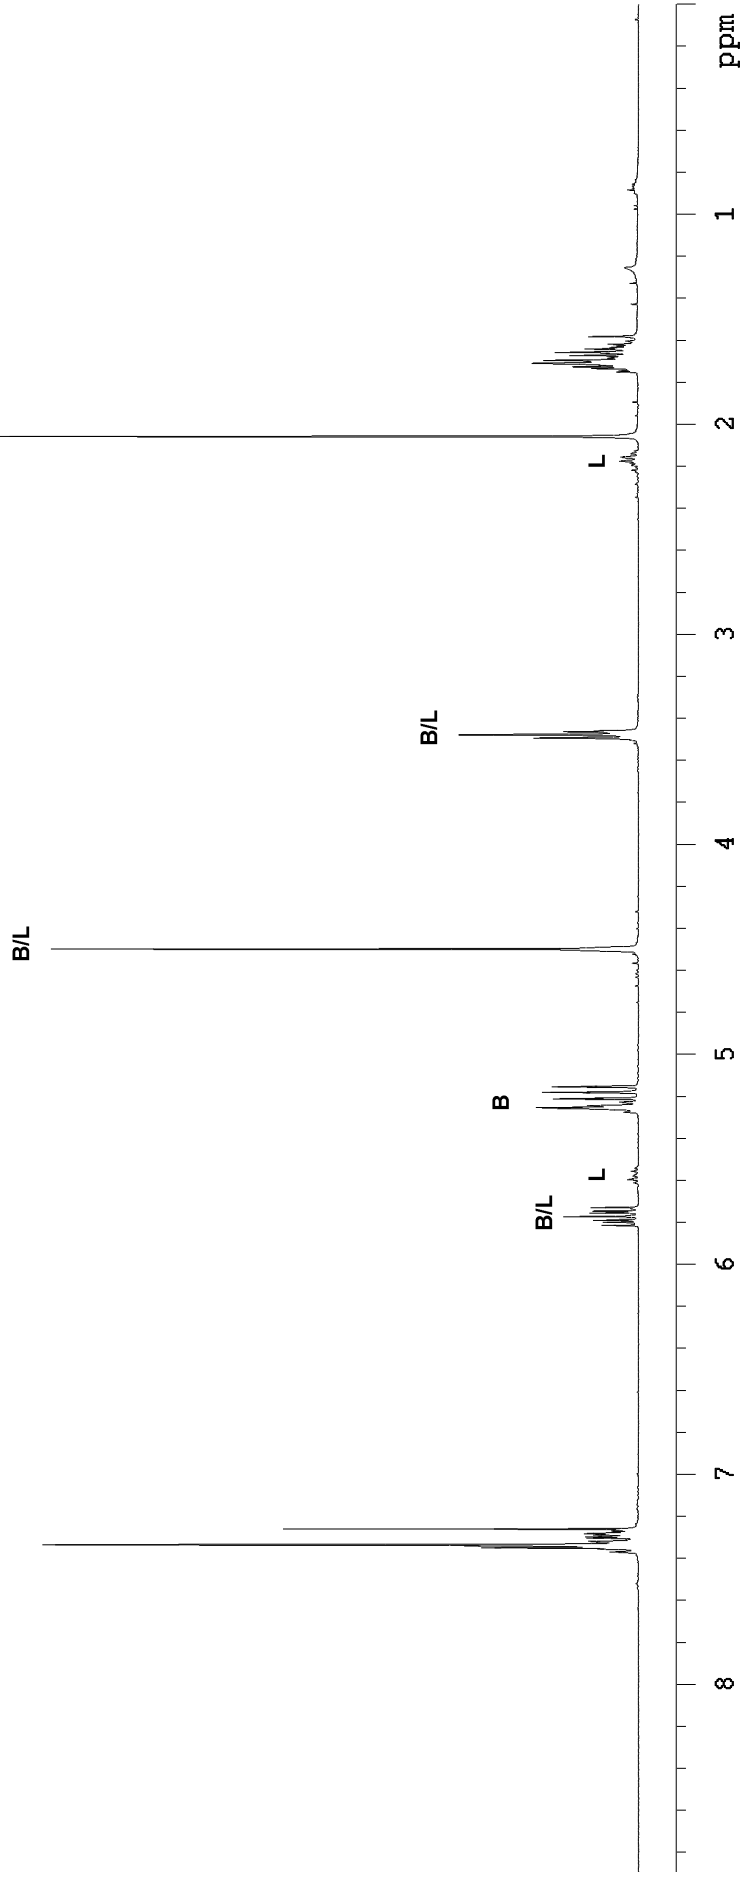

**(4R)-1-O-Benzyl-4-acetoxy-5-hexen-1,4-diol (3-OAc)**

Pulse Sequence: s2pul

Solvent: CDCl<sub>3</sub>

Ambient temperature

User: 1-14-87

File: DJC-4-301-13C

INOVA-500 "sunds1"

Relax. delay 5.000 sec

Pulse 53.3 degrees

Acq. time 1.024 sec

Width 32000.0 Hz

28 repetitions

OBSERVE C13, 125.5817522 MHz

DECOUPLE H1, 499.4315638 MHz

Power 44 dB

continuously on

WALTZ-16 modulated

DATA PROCESSING

Line broadening 1.0 Hz

FT size 65536

Total time 1 hr, 40 min, 32 sec

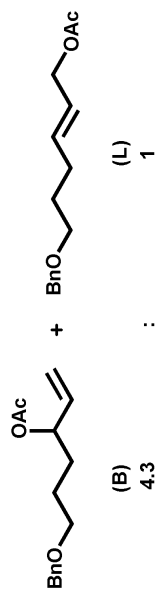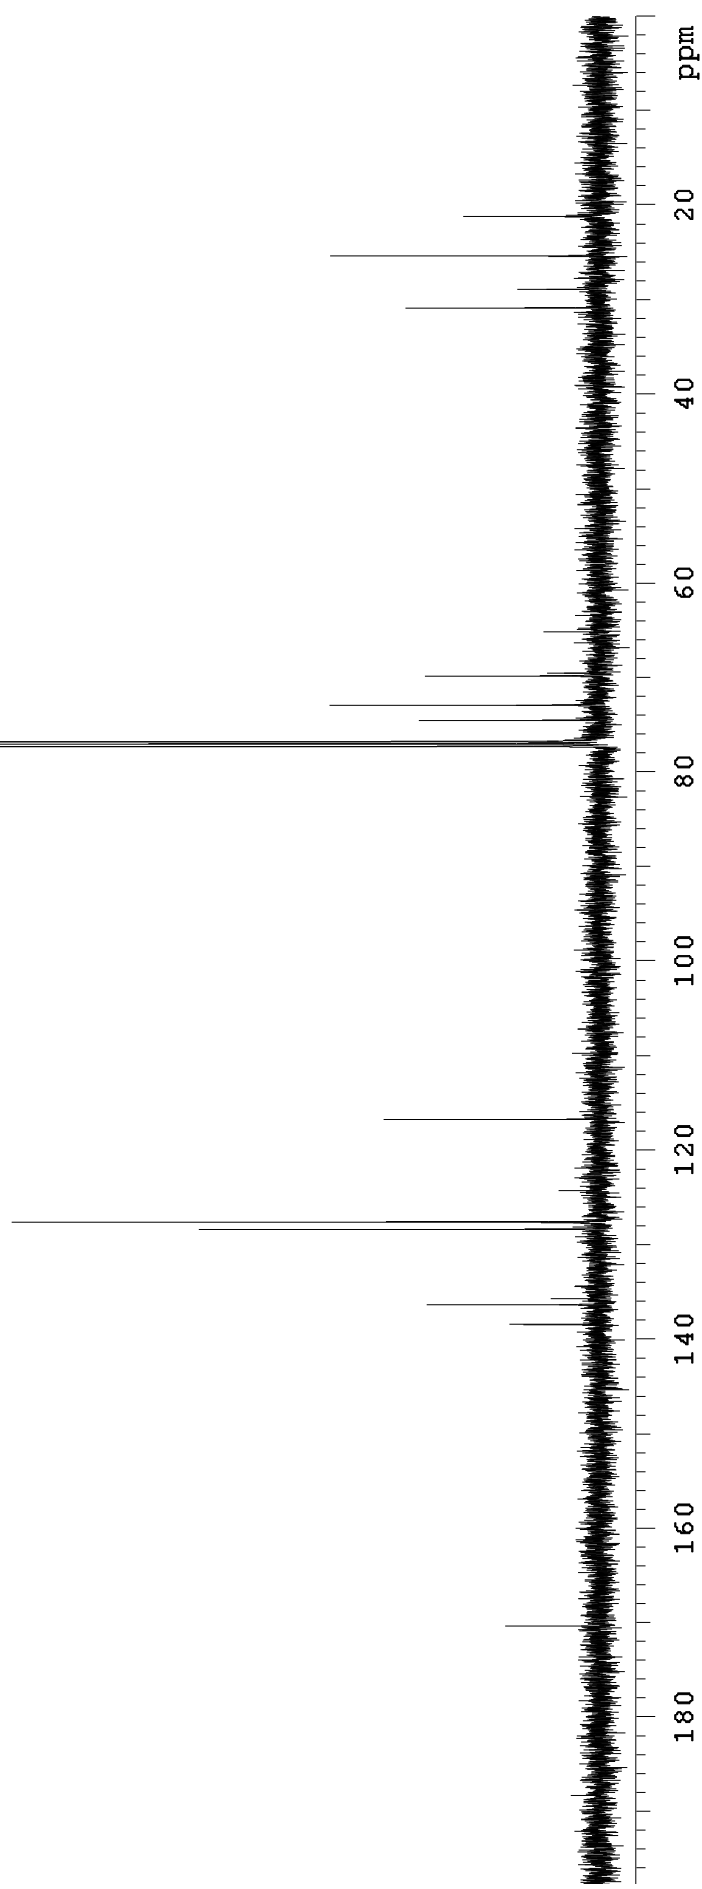

**4R)-1-O-Benzyl-5-hexen-1,4-diol ((-)-3)**

Pulse Sequence: s2pul

Solvent: CDCl<sub>3</sub>

Ambient temperature

File: DJC-6-161-1H

INOVA-500 "sunds1"

Relax. delay 15.000 sec

Pulse 90.0 degrees

Acq. time 4.096 sec

Width 8000.0 Hz

2 repetitions

OBSERVE H1, 500.0678131 MHz

DATA PROCESSING

Line broadening 0.3 Hz

FT size 65536

Total time 0 min, 38 sec

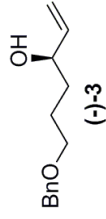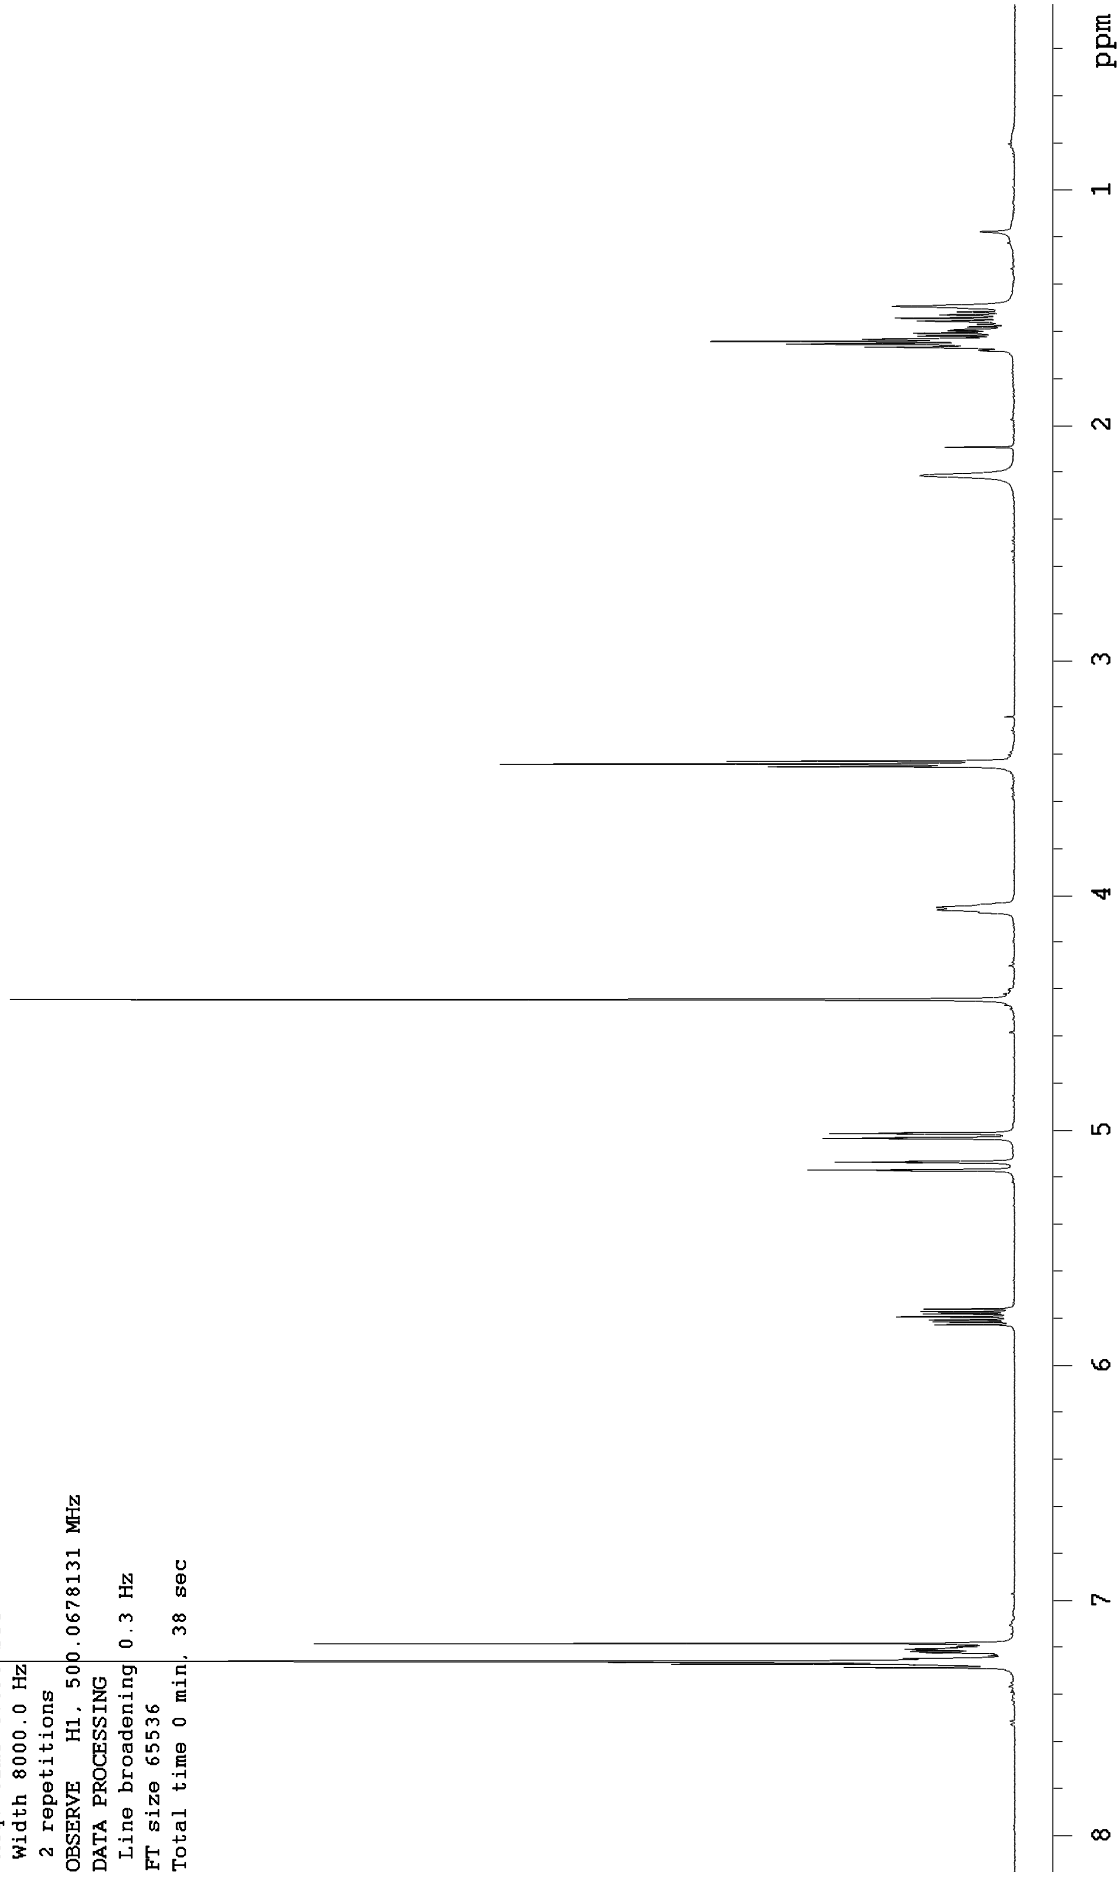



**4R)-1-O-Benzyl--5-hexen-1,4-diol ((-)-3)**

Pulse Sequence: s2pul

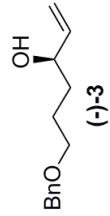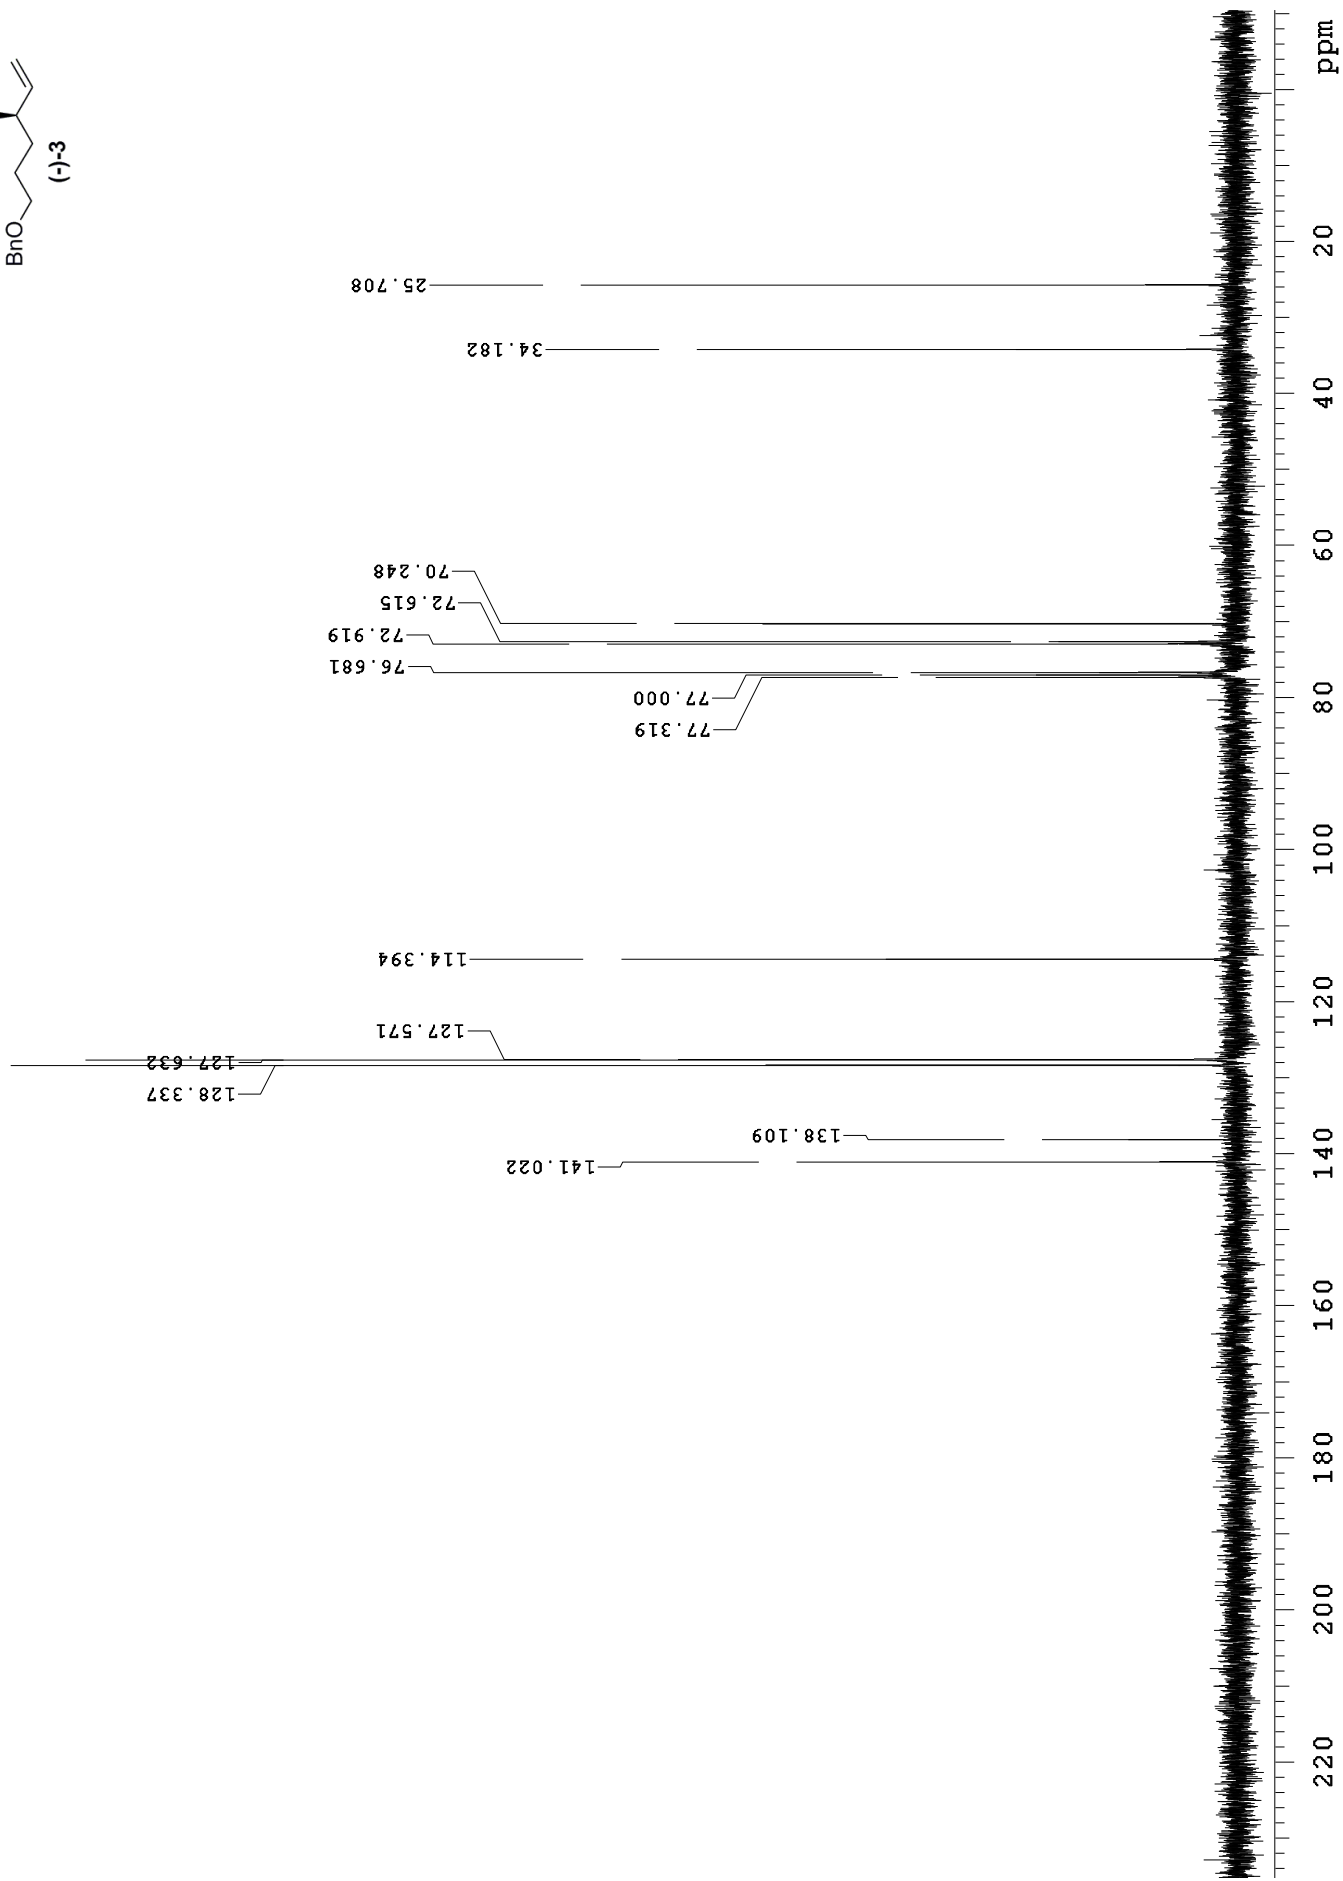

Acq. Operator : sad  
 Acq. Instrument : Chiral GC Inj Volume : Manually  
 Acq. Method : C:\HPCHEM\2\METHODS\SUB120DC.M  
 Last changed : 3/2/2010 12:47:09 PM by sad  
 Analysis Method : C:\HPCHEM\2\METHODS\SUB120DC.M  
 Last changed : 10/16/2010 2:33:37 PM by sad  
 (modified after loading)

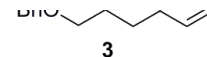

Test

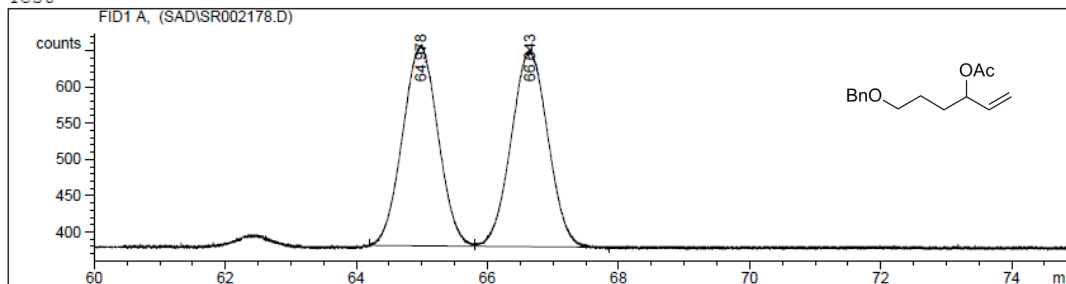

Signal 1: FID1 A,

| Peak # | RetTime [min] | Type | Width [min] | Area counts*s | Height [counts] | Area %   |
|--------|---------------|------|-------------|---------------|-----------------|----------|
| 1      | 64.978        | BV   | 0.6006      | 1.03758e4     | 274.75067       | 49.70793 |
| 2      | 66.643        | VP   | 0.6327      | 1.04977e4     | 268.16049       | 50.29207 |

Test

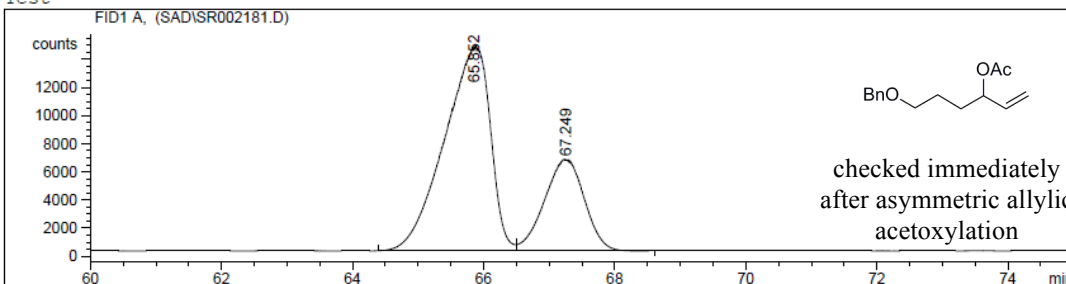

Signal 1: FID1 A,

| Peak # | RetTime [min] | Type | Width [min] | Area counts*s | Height [counts] | Area %   |
|--------|---------------|------|-------------|---------------|-----------------|----------|
| 1      | 65.852        | BV   | 0.7832      | 7.09046e5     | 1.43813e4       | 72.04422 |
| 2      | 67.249        | VB   | 0.6715      | 2.75136e5     | 6478.43213      | 27.95578 |

Test

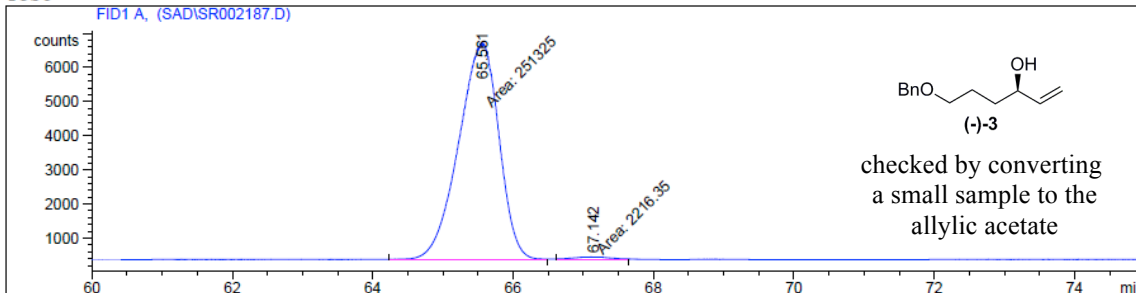

Signal 1: FID1 A,

| Peak # | RetTime [min] | Type | Width [min] | Area counts*s | Height [counts] | Area %   |
|--------|---------------|------|-------------|---------------|-----------------|----------|
| 1      | 65.561        | MM   | 0.6618      | 2.51325e5     | 6329.74902      | 99.12584 |
| 2      | 67.142        | MM   | 0.5854      | 2216.35474    | 63.09792        | 0.87416  |

Test

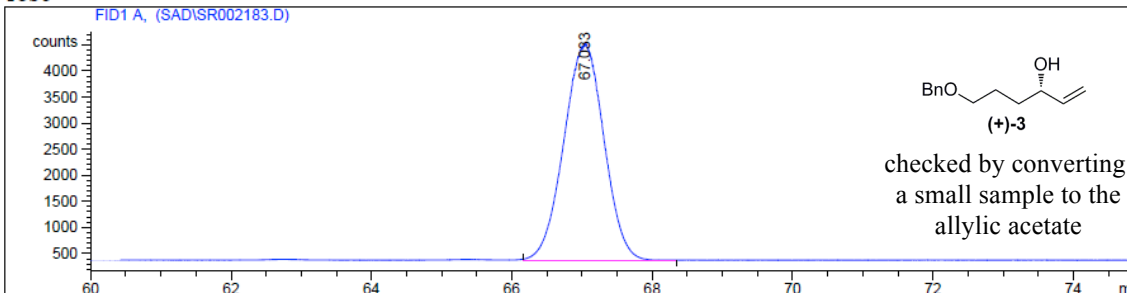

Signal 1: FID1 A,

| Peak # | RetTime [min] | Type | Width [min] | Area counts*s | Height [counts] | Area % |
|--------|---------------|------|-------------|---------------|-----------------|--------|
|--------|---------------|------|-------------|---------------|-----------------|--------|

# ethyl (9R)-9-acetoxyundec-10-enoate (9-OAc)

Sequence: s2pul

Solvent: CDCl3

Temp: 19.0 C / 292.1 K

File: DJC-4-145-2

WA-500 "sunds1"

Relax. delay 15.000 sec

ulse 49.2 degrees

Acq. time 4.096 sec

Resolution 8000.0 Hz

Repetitions

Frequency 499.4298992 MHz

Mode: 1D

Temperature 19.000 C

Time 1 min, 16 sec

File size 65536

Acquisition time 1 min, 16 sec

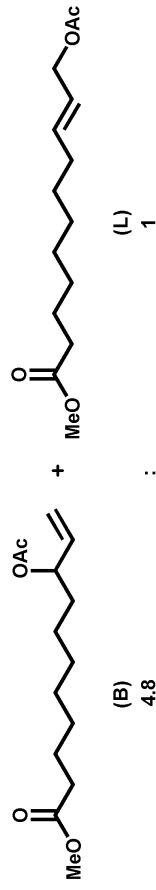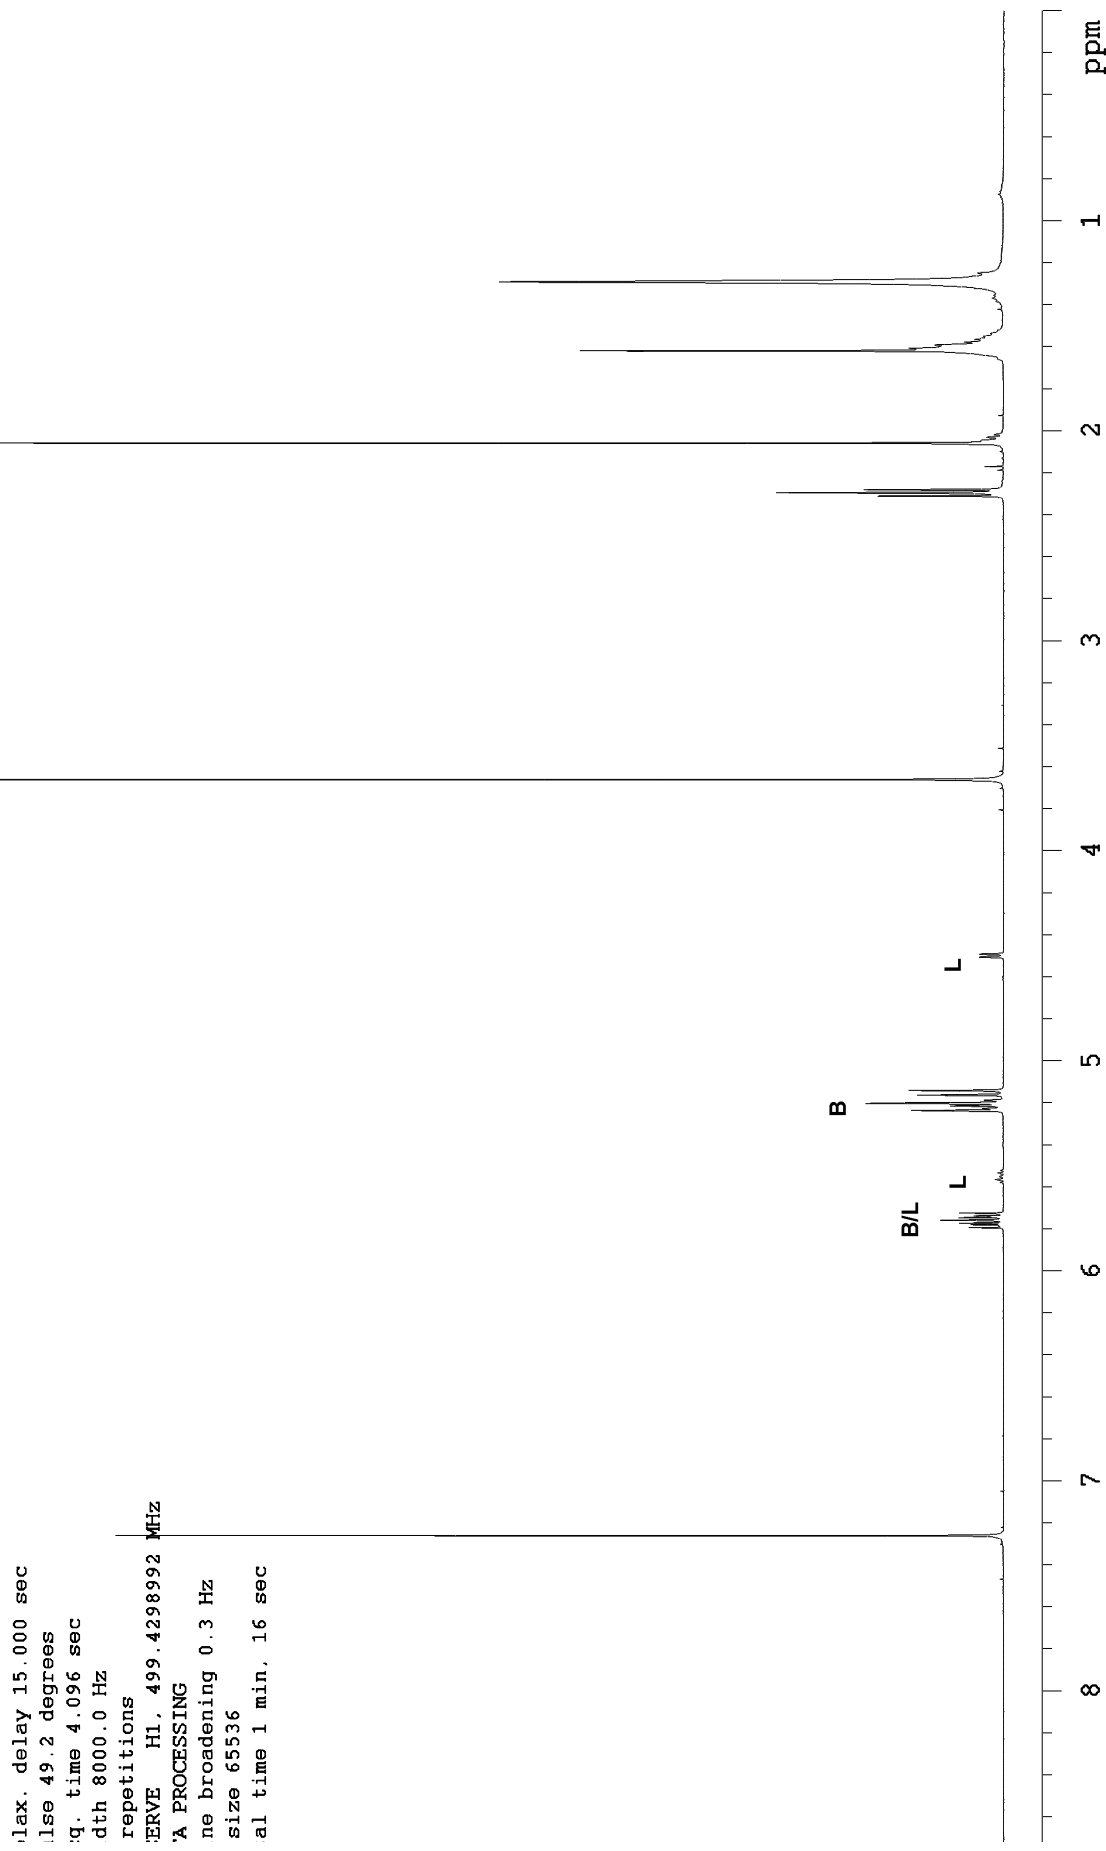

# ethyl (9R)-9-acetoxyundec-10-eneoate (9-OAc)

Use Sequence: s2pul

solvent: CDCl3

ambient temperature

acq. time 1-14-87

file: DJC-4-145-13C

DATA-500 "sunds1"

relax. delay 5.000 sec

pulse 53.3 degrees

acq. time 1.024 sec

width 32000.0 Hz

5 repetitions

SERVE C13, 125.5817522 MHz

COUPLE H1, 499.4315638 MHz

power 44 dB

continuously on

ALTZ-16 modulated

FA PROCESSING

line broadening 1.0 Hz

size 65536

total time 1 hr, 40 min, 32 sec

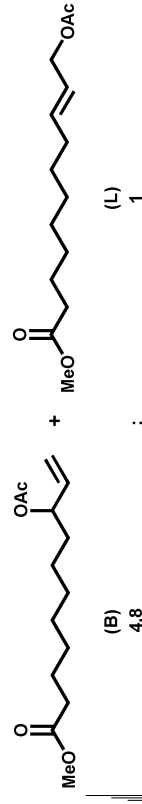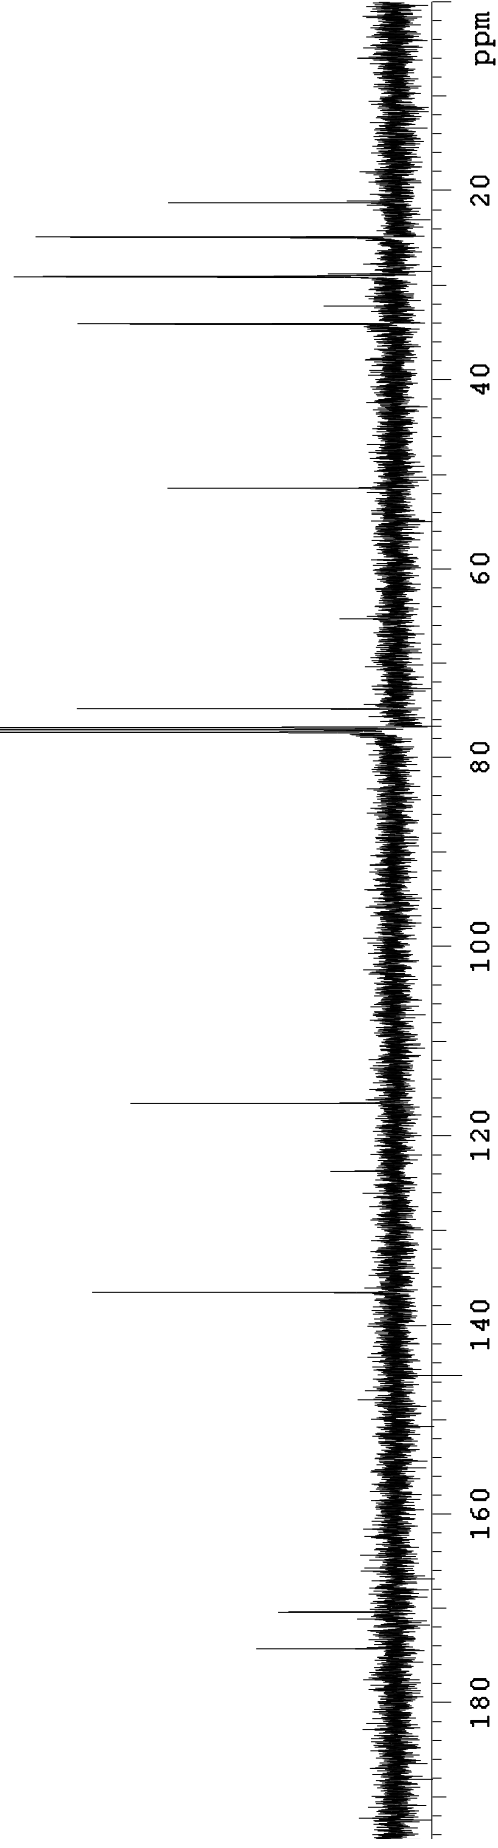

ethyl (9*R*)-9-hydroxyundec-10-enoate ((-)-9)

Use Sequence: s2pul

solvent: CDCl3

ambient temperature

file: DJC-6-233-1H

AVA-500 "sunds1"

relax. delay 20.000 sec

pulse 90.0 degrees

acq. time 4.096 sec

width 8000.0 Hz

repetitions

SERVE H1, 500.0677753 MHz

1A PROCESSING

line broadening 0.3 Hz

size 65536

total time 6 min., 25 sec

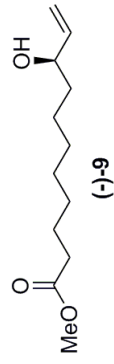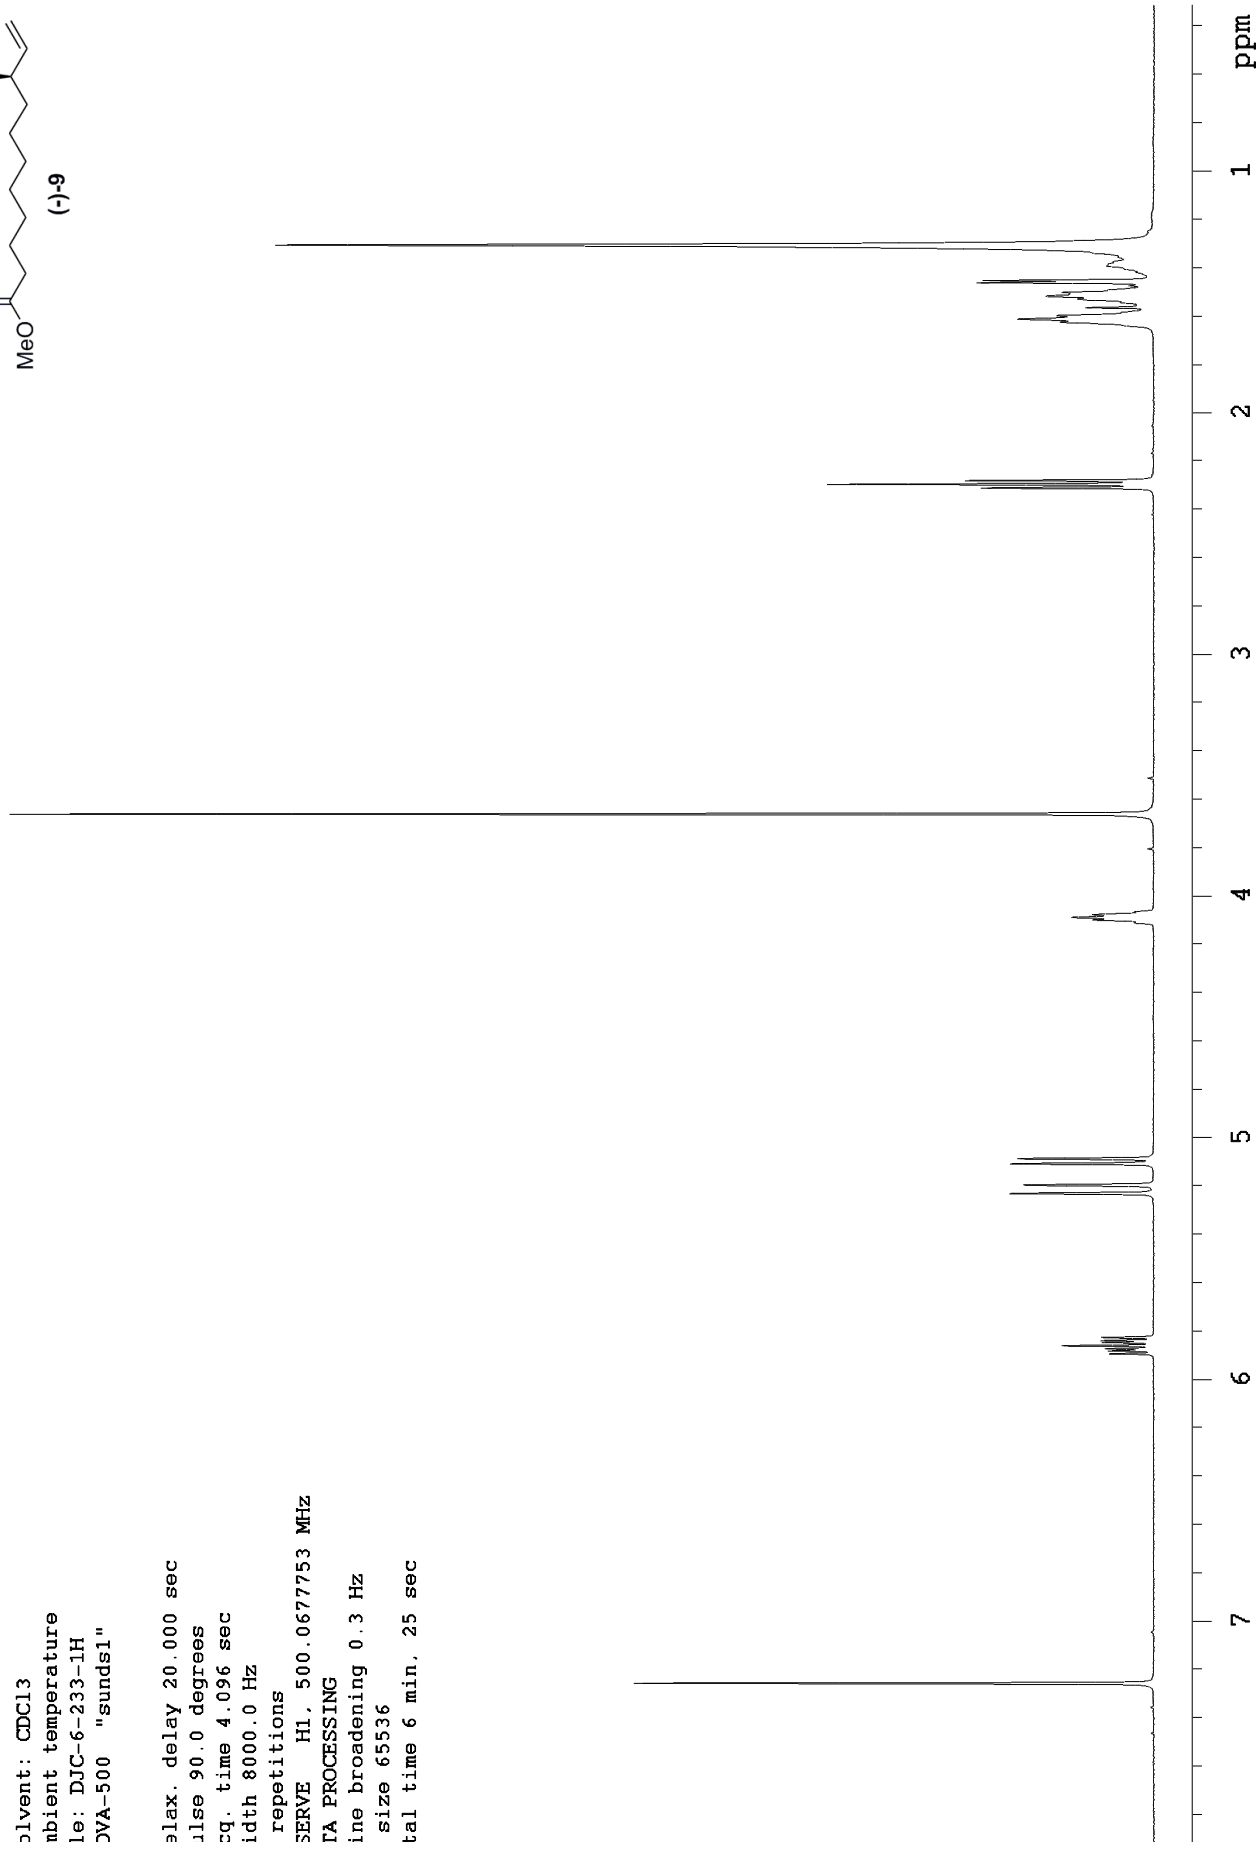

# Methyl (9*R*)-9-hydroxyundec-10-enoate ((-)-9)

Pulse Sequence: s2pul

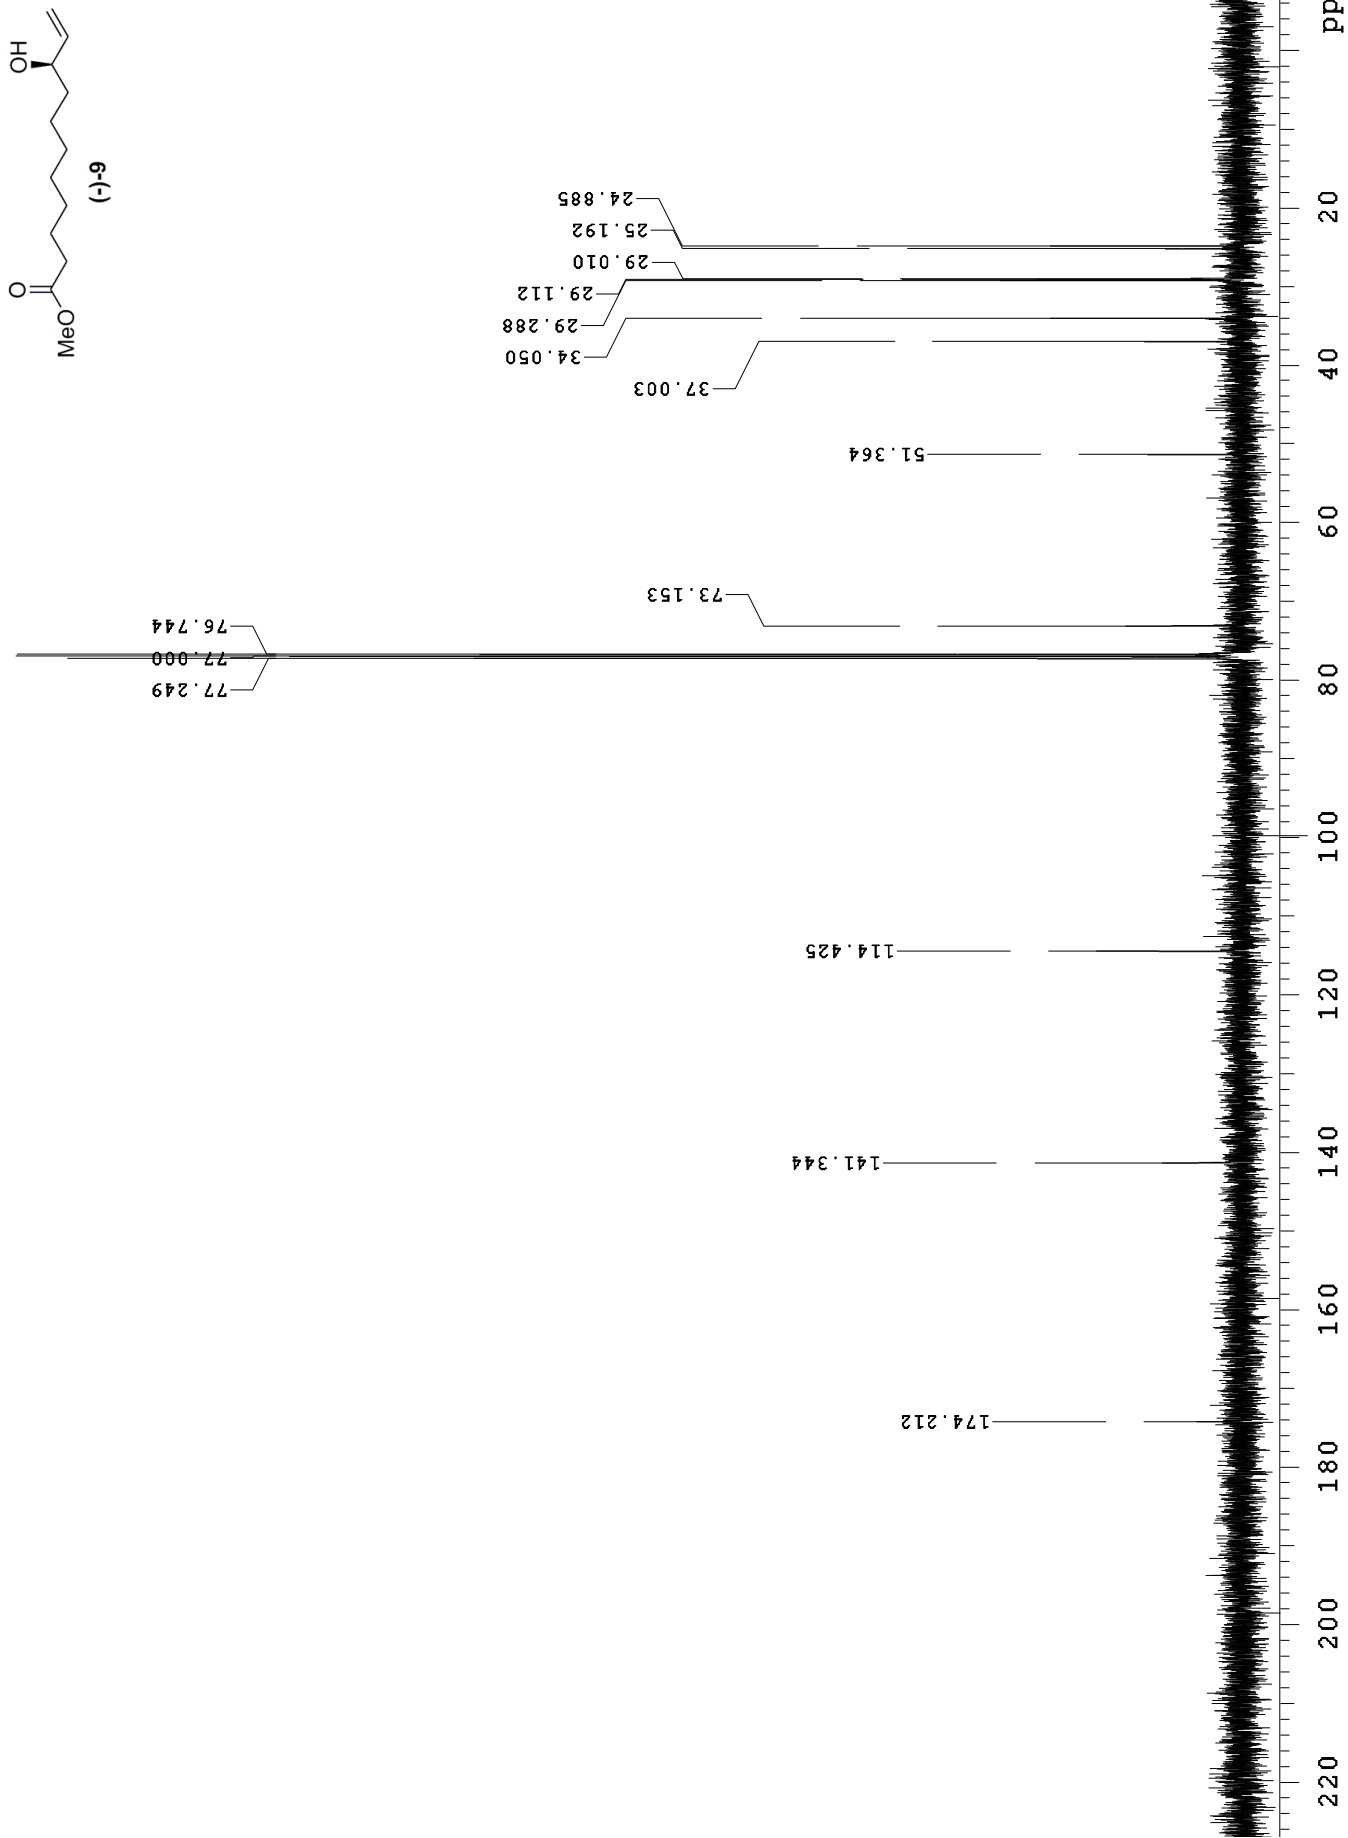

Sample Name : DJC-Est Location : Vial 101  
 Acq. Operator : sad  
 Acq. Instrument : Chiral GC Inj Volume : Manually  
 Acq. Method : C:\HPCHEM\2\METHODS\SUB120DC.M  
 Last changed : 3/2/2010 12:47:09 PM by sad  
 Analysis Method : C:\HPCHEM\2\METHODS\SUB120DC.M  
 Last changed : 10/15/2010 5:50:14 PM by sad  
 (modified after loading)

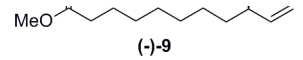

Test

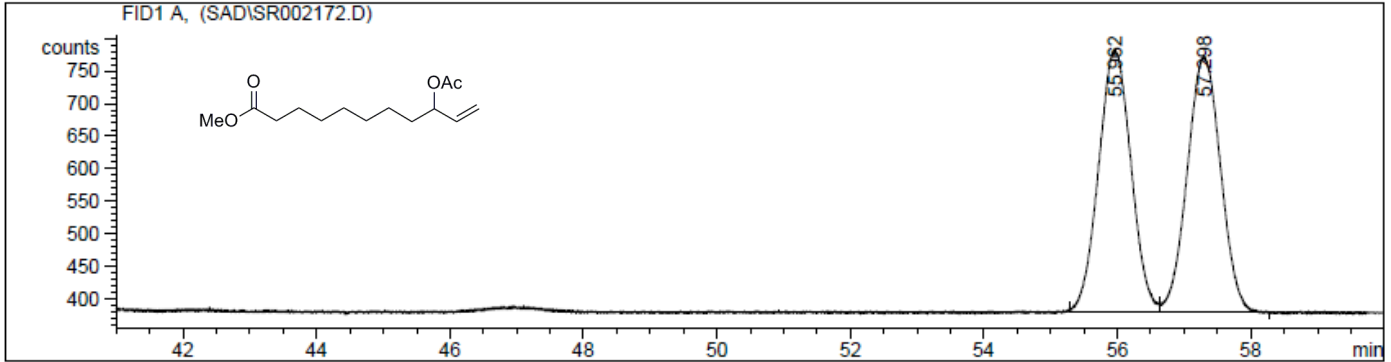

Signal 1: FID1 A,

| Peak # | RetTime [min] | Type | Width [min] | Area counts*s | Height [counts] | Area %   |
|--------|---------------|------|-------------|---------------|-----------------|----------|
| 1      | 55.962        | BV   | 0.5416      | 1.36569e4     | 400.73901       | 49.89569 |
| 2      | 57.298        | VB   | 0.5529      | 1.37140e4     | 391.25912       | 50.10431 |

Test

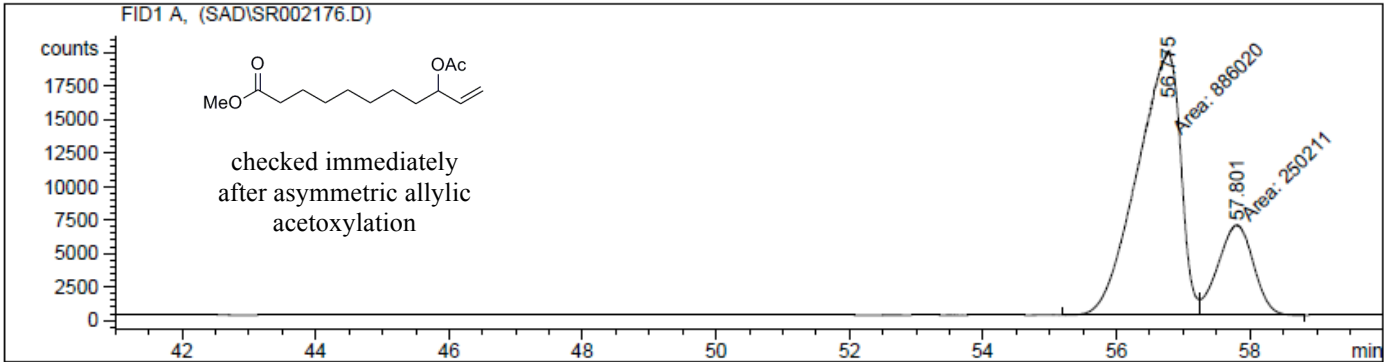

Signal 1: FID1 A,

| Peak # | RetTime [min] | Type | Width [min] | Area counts*s | Height [counts] | Area %   |
|--------|---------------|------|-------------|---------------|-----------------|----------|
| 1      | 56.775        | MF   | 0.7438      | 8.86020e5     | 1.98544e4       | 77.97884 |
| 2      | 57.801        | FM   | 0.6203      | 2.50211e5     | 6723.03027      | 22.02116 |

Test

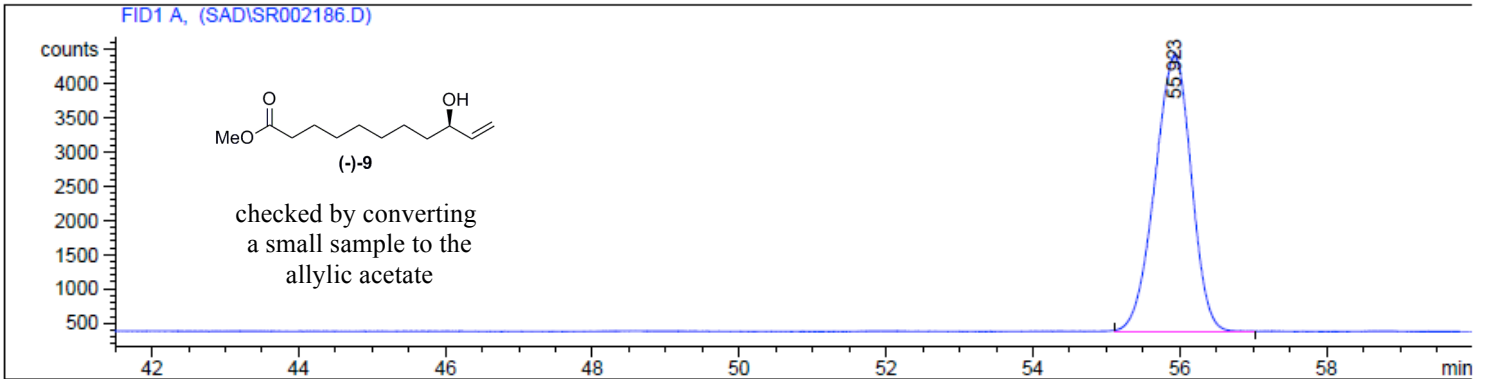

Signal 1: FID1 A,

| Peak # | RetTime [min] | Type | Width [min] | Area counts*s | Height [counts] | Area % |
|--------|---------------|------|-------------|---------------|-----------------|--------|
| 1      | 55.923        |      |             |               |                 |        |

Pent-4-en-1-yl)-1,3-dioxane (15)

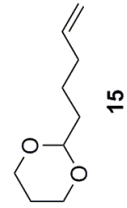

se Sequence: s2pul  
 solvent: CDCl3  
 ambient temperature  
 e: DJC-6-193-IH  
 WA-500 "sunds1"

lax. delay 30.000 sec  
 lse 90.0 degrees  
 q. time 4.096 sec  
 dth 8000.0 Hz  
 ngle scan  
 ERVE H1, 500.0677753 MHz  
 'A PROCESSING  
 ne broadening 0.3 Hz  
 size 65536  
 al time 4 min, 32 sec

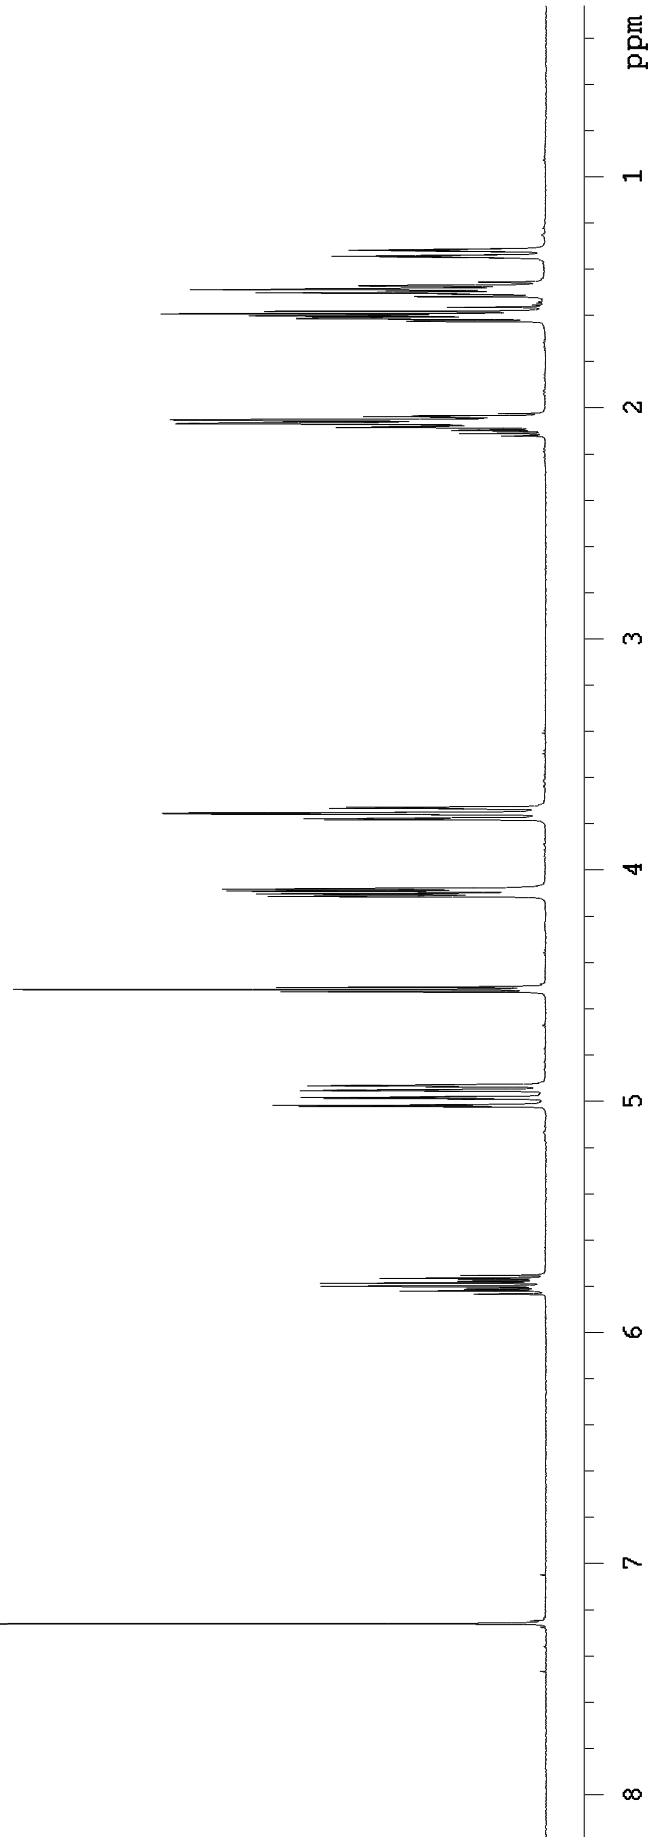



**2-(Pent-4-en-1-yl)-1,3-dioxane (15)**

Pulse Sequence: s2pul

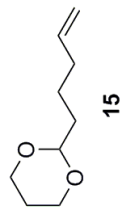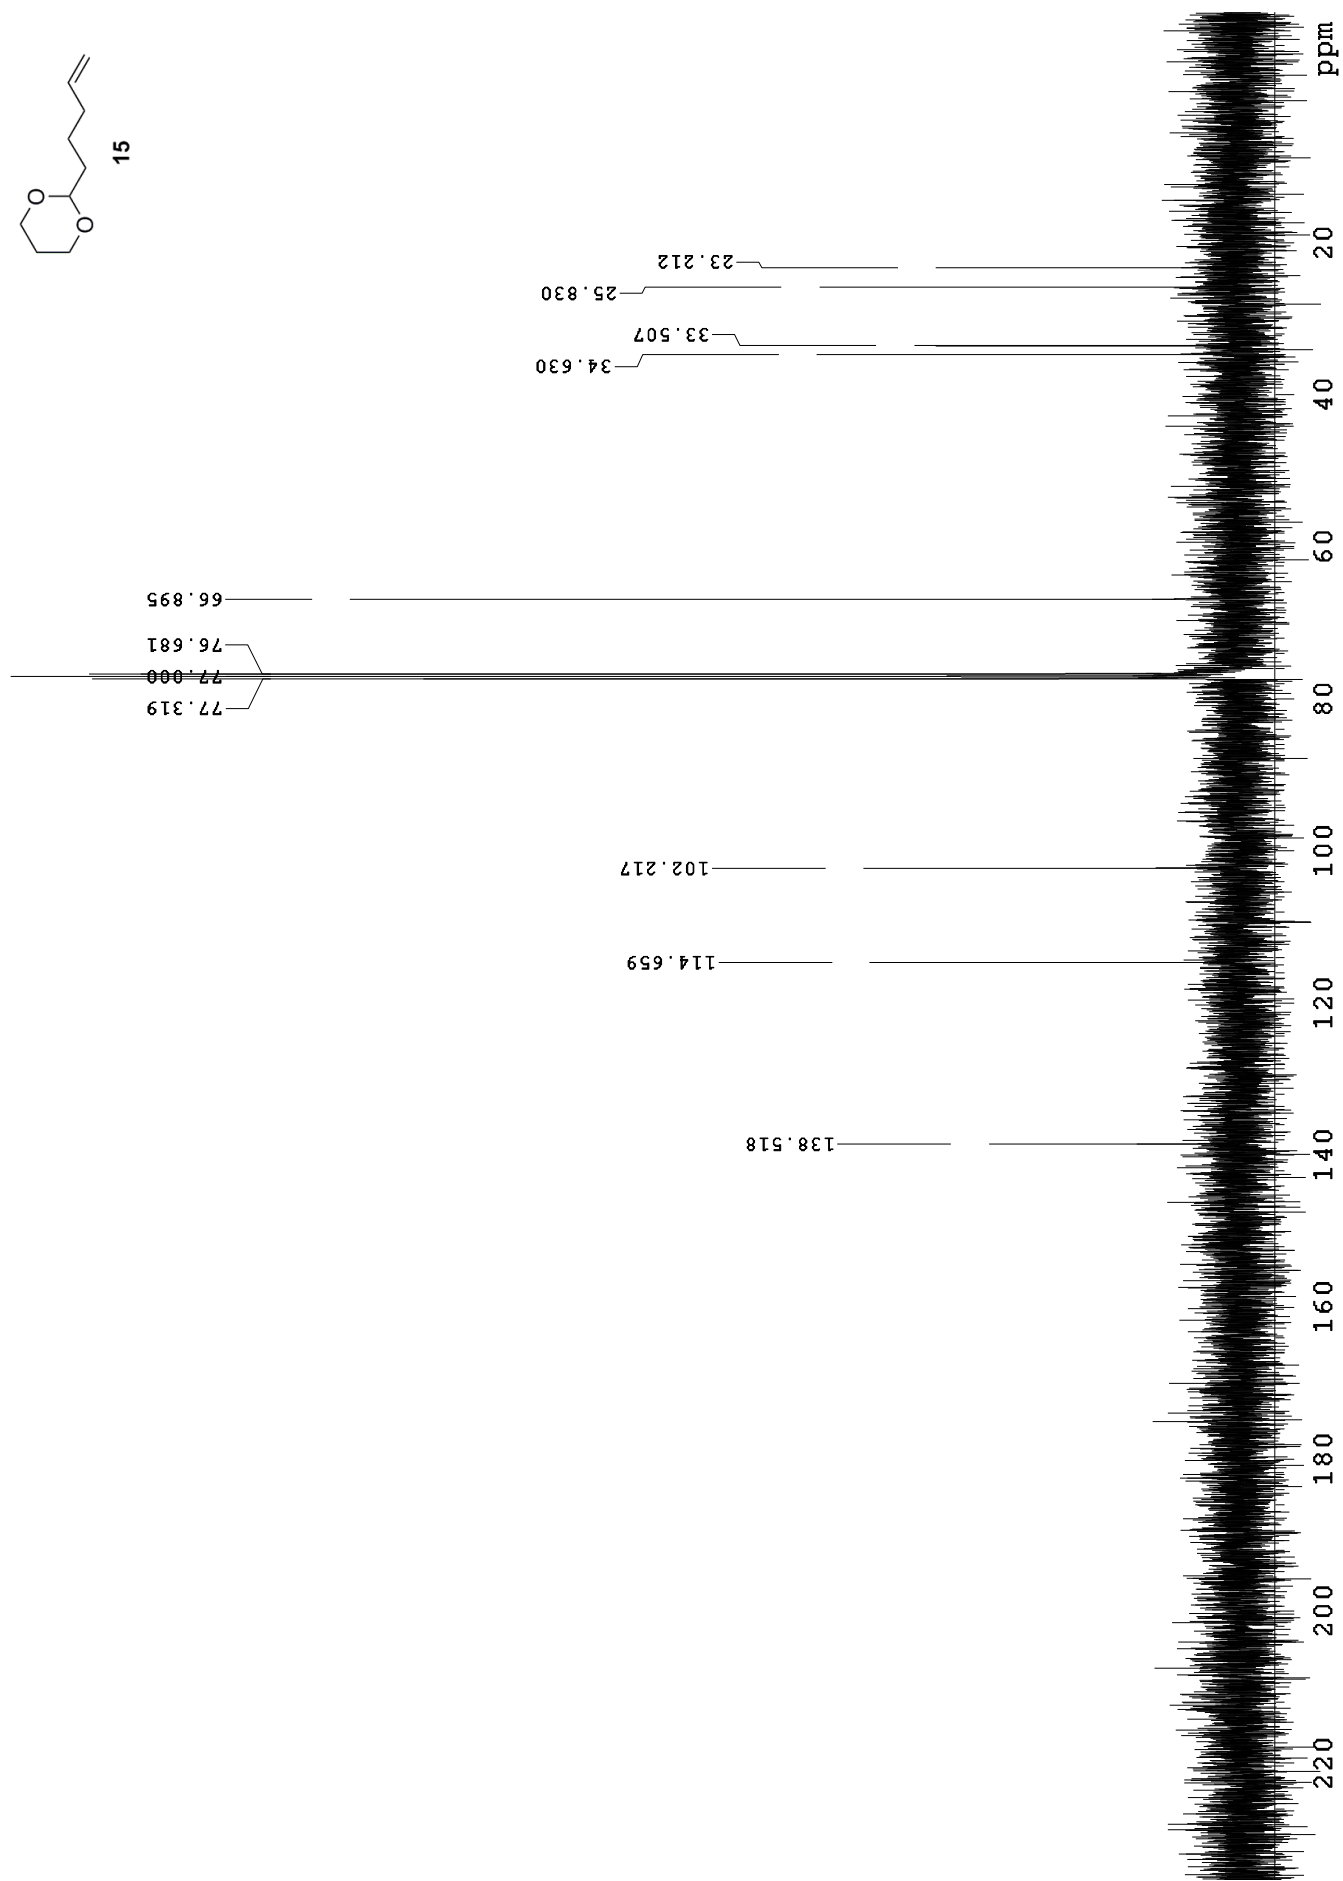

2-((3*R*)-Pent-3-acetoxy-4-en-1-yl-3-ol)-1,3-dioxane (13-OAc)

Pulse Sequence: s2pul

Solvent: CDCl<sub>3</sub>

Ambient temperature

File: DJC-9-144-1H

INOVA-500 "sunds1"

Relax. delay 20.000 sec

Pulse 61.6 degrees

Acq. time 4.665 sec

Width 7024.9 Hz

2 repetitions

OBSERVE H1, 499.6906570 MHz

DATA PROCESSING

Line broadening 0.3 Hz

FT size 65536

Total time 13 min. 9 sec

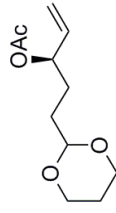

B

B/L

L

8

7

6

5

4

3

2

1

ppm

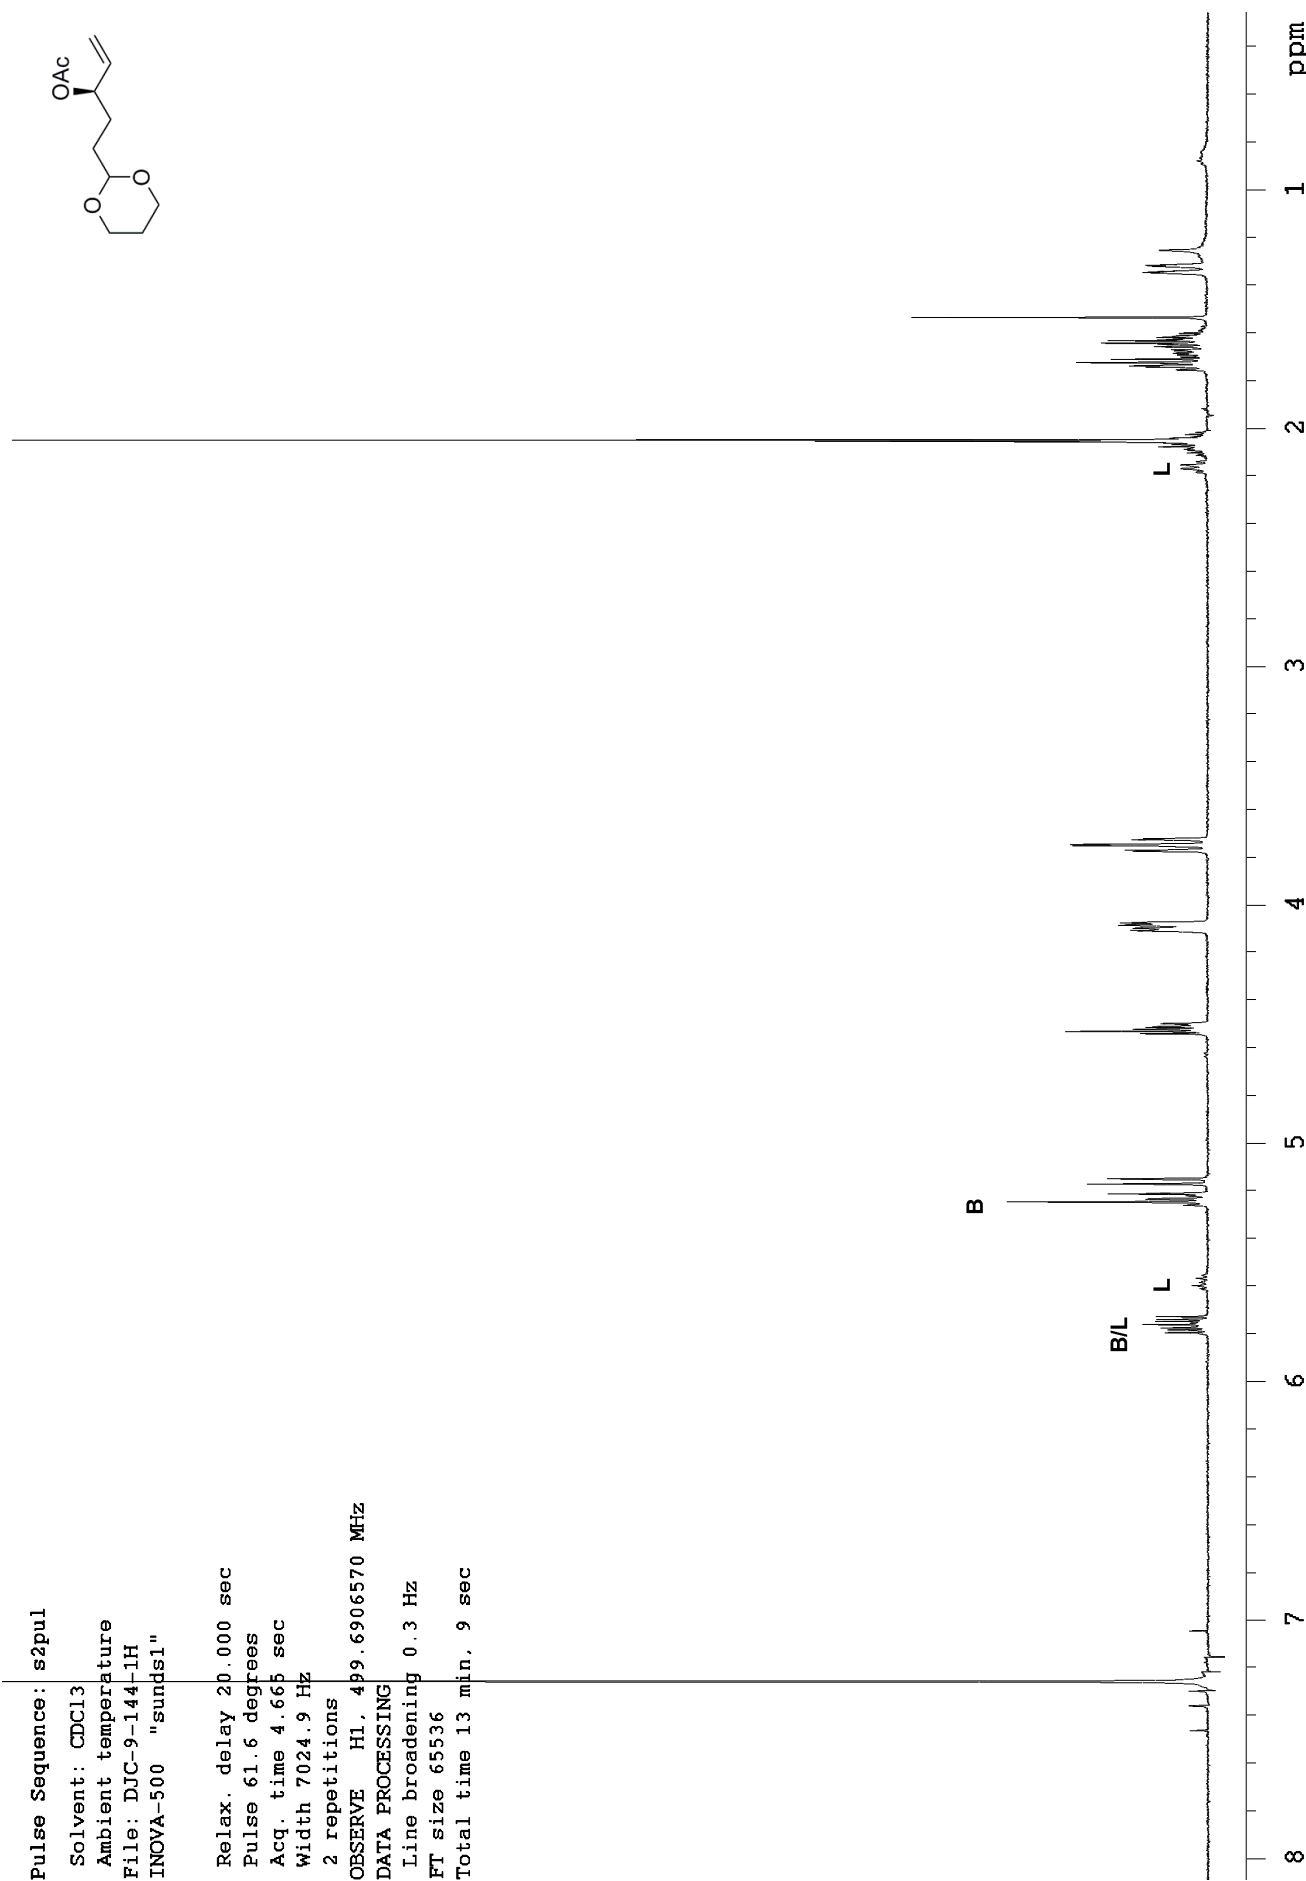

**2-((3R)-Pent-3-acetoxy-4-en-1-yl-3-ol)-1,3-dioxane (13-OAc)**

Pulse Sequence: s2pul

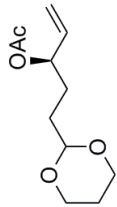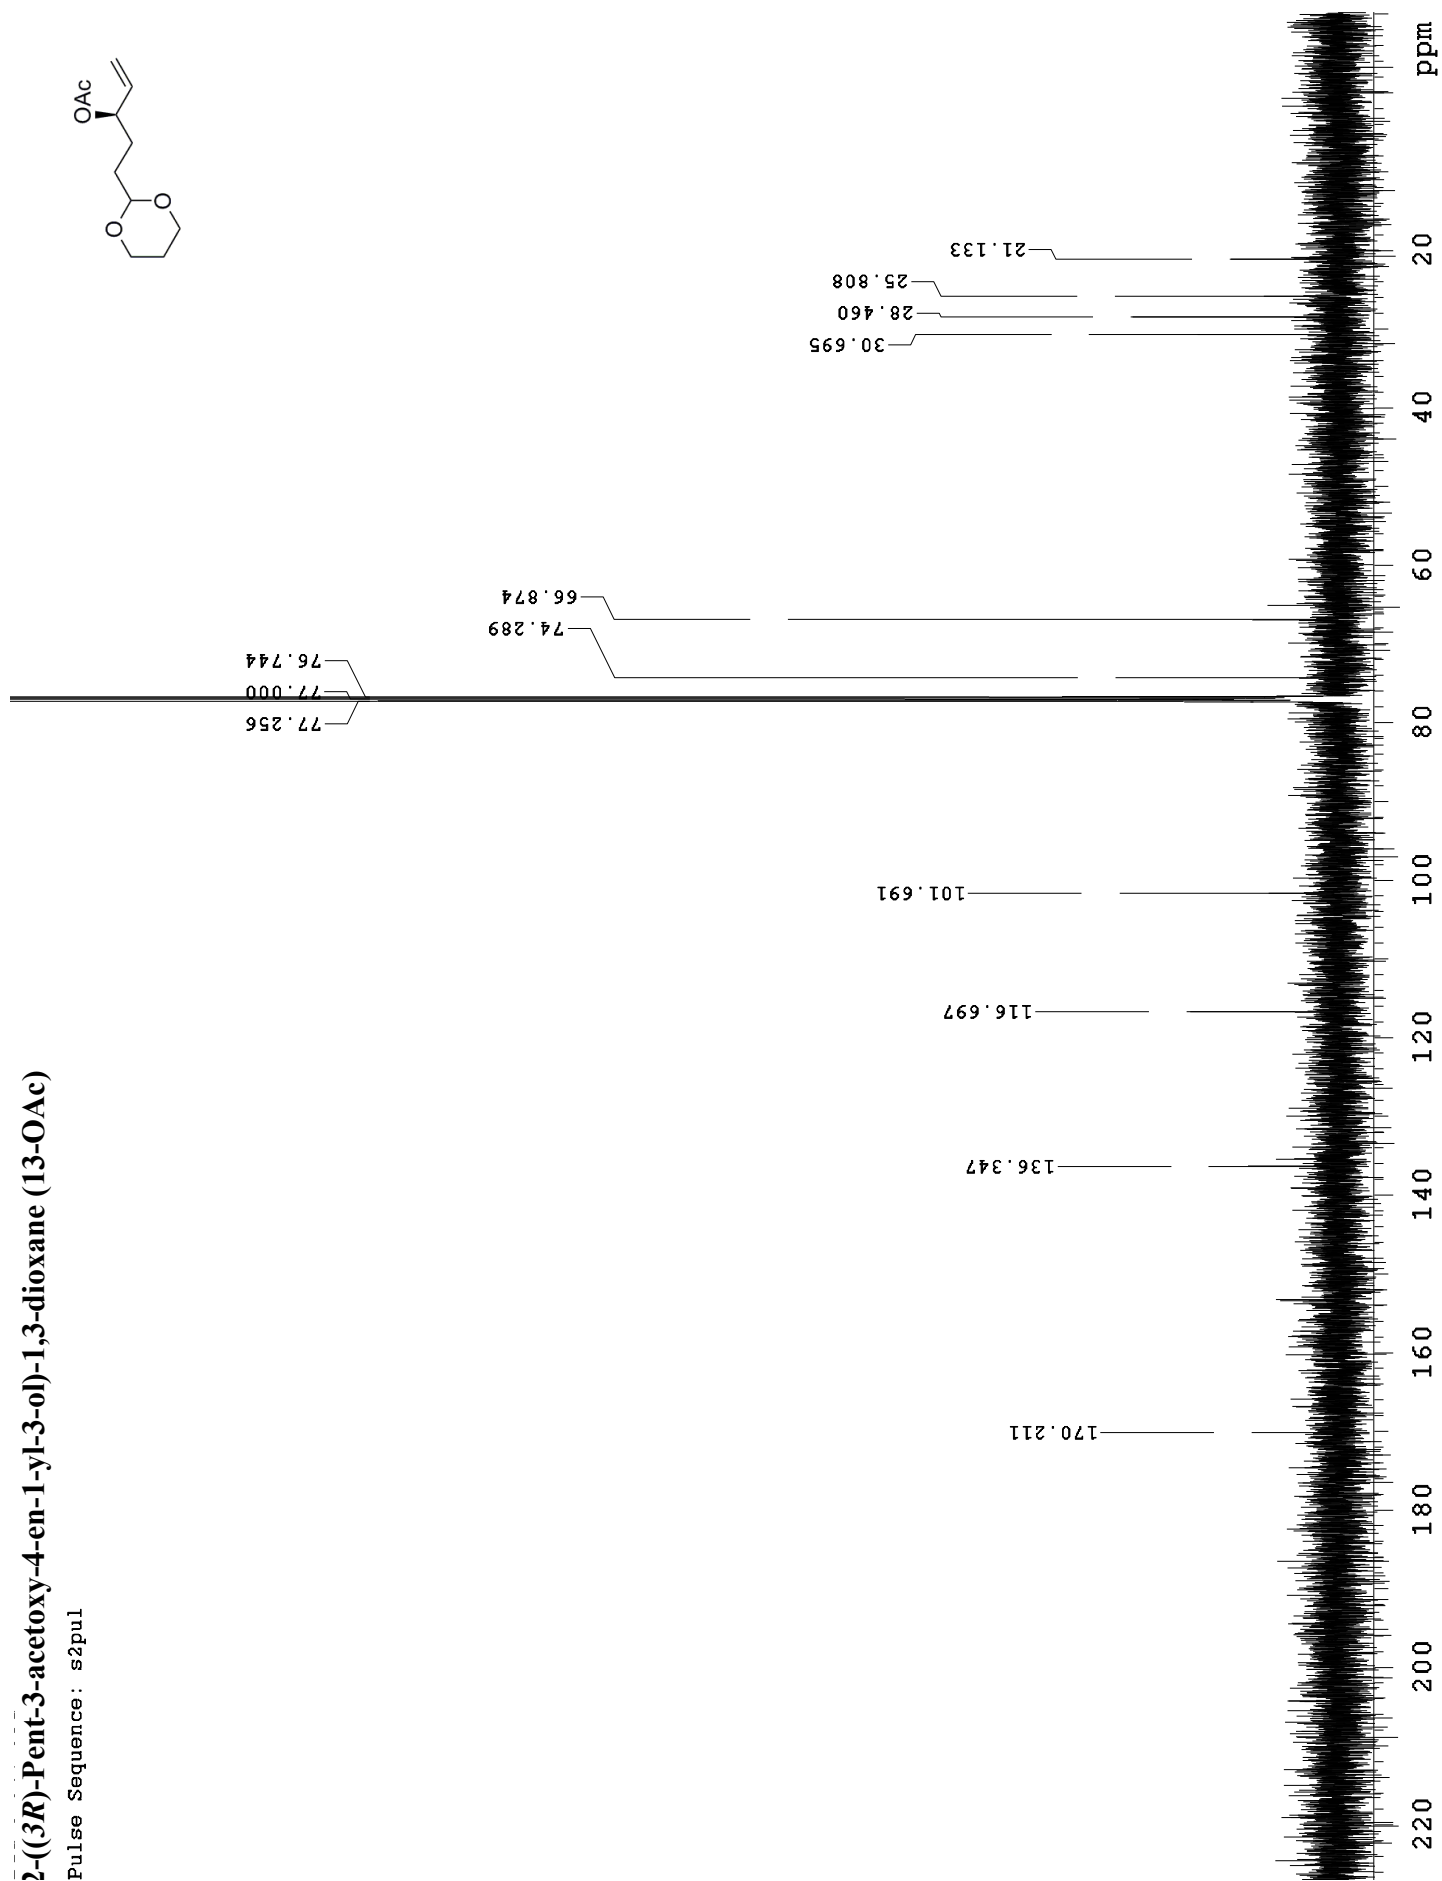

**2-(((3R)-Pent-4-en-1-yl-3-ol)-1,3-dioxane ((-)-13)**

Pulse Sequence: s2pul

Solvent: CDCl3

Ambient temperature

File: DJC-6-171

INOVA-500 "sunds1"

Relax. delay 10.000 sec

Pulse 45.0 degrees

Acq. time 4.096 sec

Width 8000.0 Hz

4 repetitions

OBSERVE H1, 399.9486778 MHz

DATA PROCESSING

Line broadening 0.3 Hz

FT size 65536

Total time 3 min. 45 sec

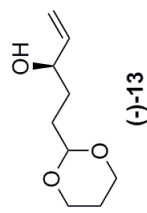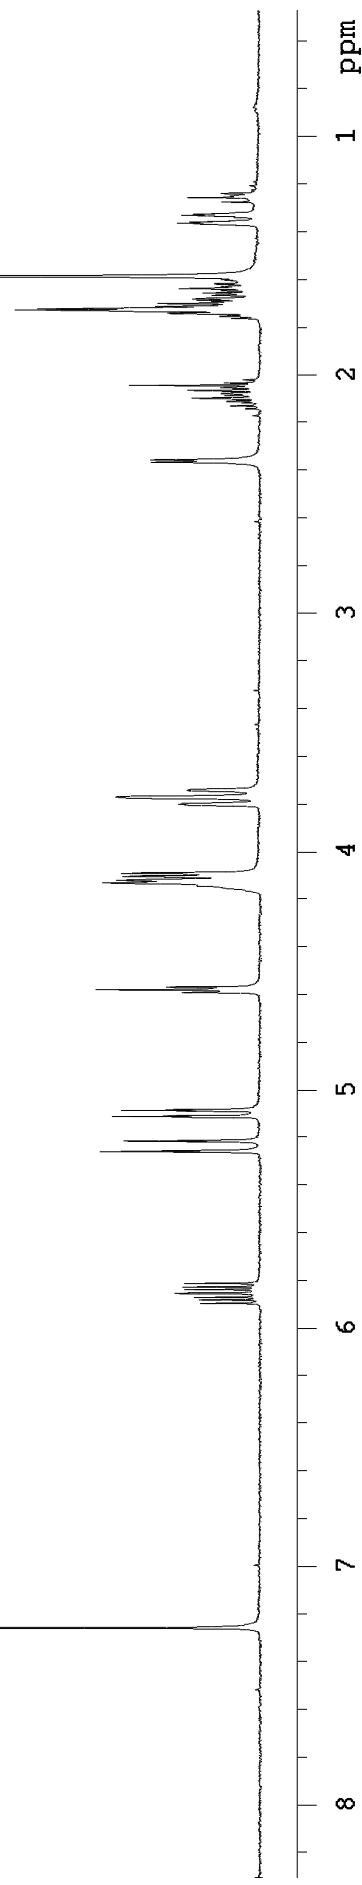

2-(((3R)-Pent-4-en-1-yl-3-ol)-1,3-dioxane ((-)-13)

Pulse Sequence: s2pul

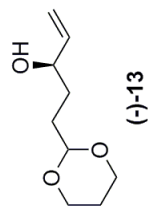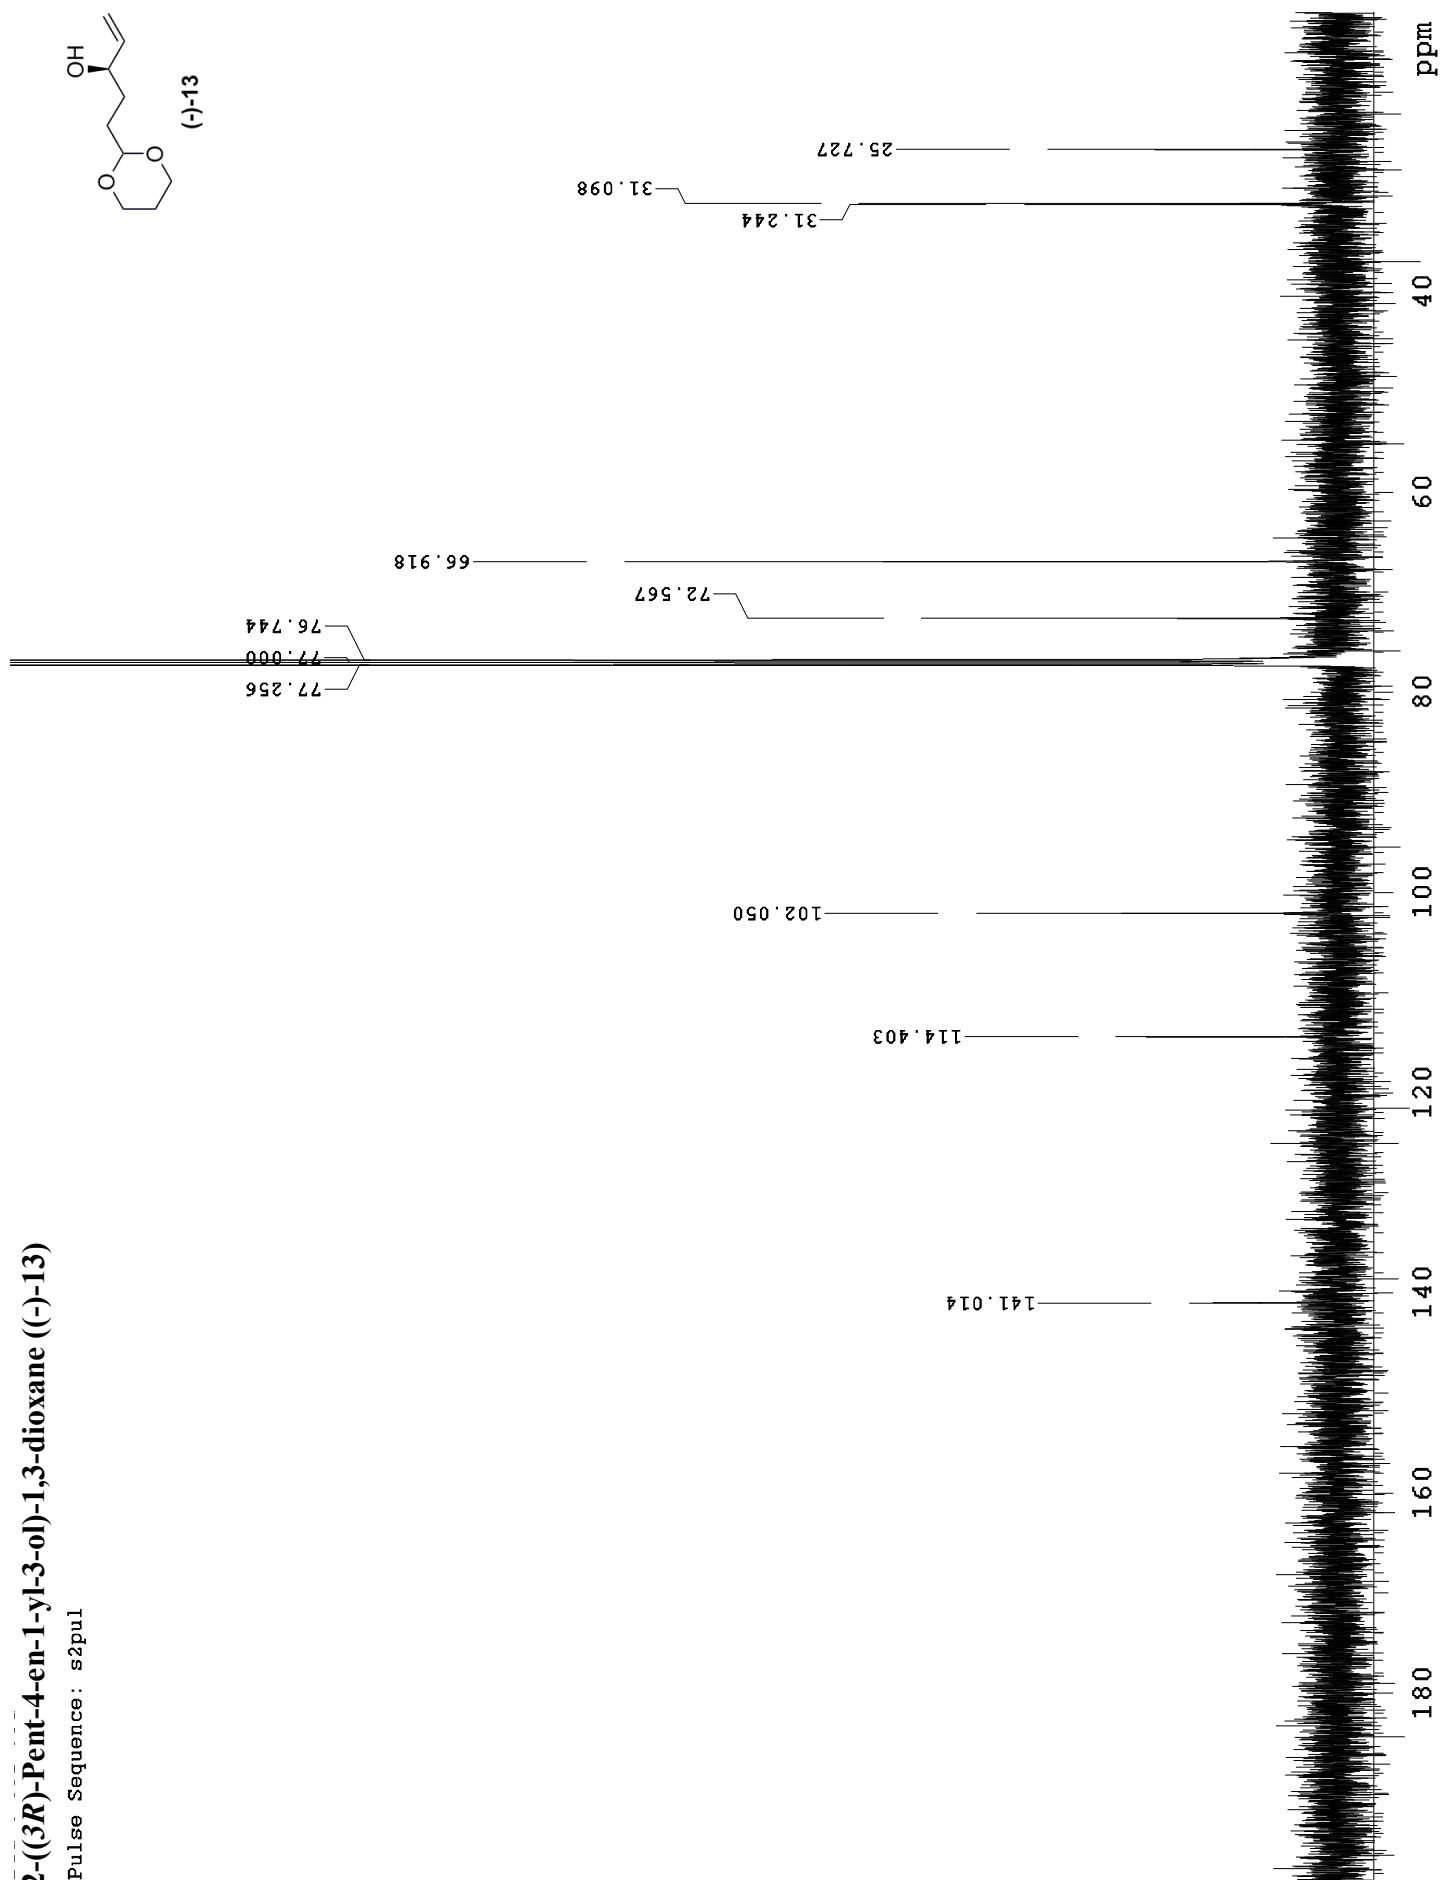

Acq. Operator : sad  
 Acq. Instrument : Chiral GC Inj Volume : Manually  
 Acq. Method : C:\HPCHEM\2\METHODS\SUB110DC.M  
 Last changed : 10/14/2010 9:46:00 PM by sad  
 Analysis Method : C:\HPCHEM\2\METHODS\SUB110DC.M  
 Last changed : 10/15/2010 12:55:17 PM by sad  
 (modified after loading)

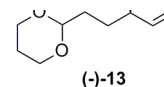

Test

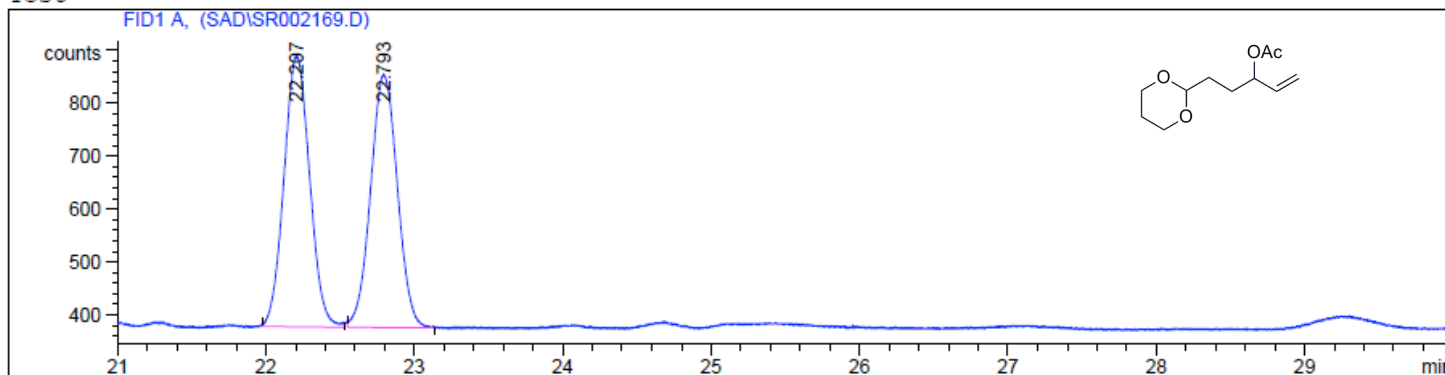

Signal 1: FID1 A,

| Peak # | RetTime [min] | Type | Width [min] | Area counts*s | Height [counts] | Area %   |
|--------|---------------|------|-------------|---------------|-----------------|----------|
| 1      | 22.207        | BB   | 0.1731      | 6155.46387    | 512.69556       | 50.65797 |
| 2      | 22.793        | BP   | 0.1840      | 5995.56445    | 479.18893       | 49.34203 |

Test

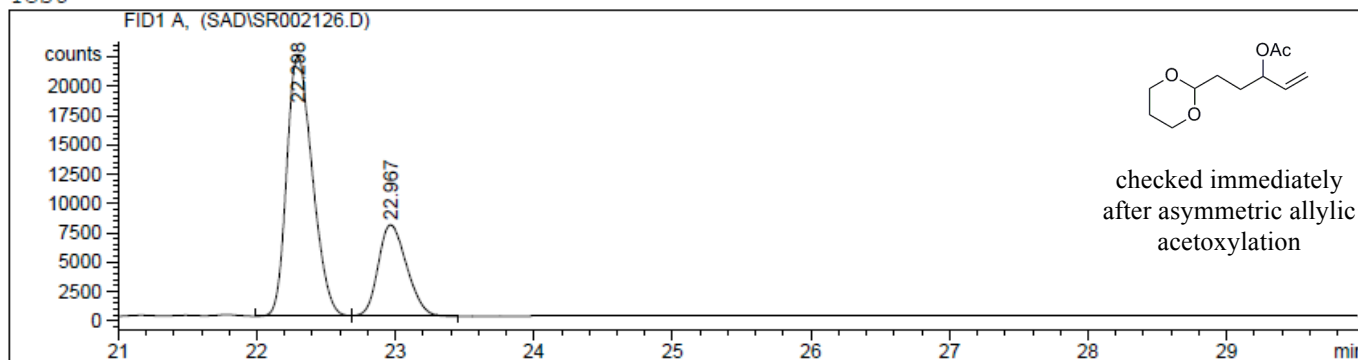

Signal 1: FID1 A,

| Peak # | RetTime [min] | Type | Width [min] | Area counts*s | Height [counts] | Area %   |
|--------|---------------|------|-------------|---------------|-----------------|----------|
| 1      | 22.298        | VV   | 0.1882      | 2.85705e5     | 2.21882e4       | 71.93395 |
| 2      | 22.967        | VB   | 0.2060      | 1.11472e5     | 7787.25928      | 28.06605 |

Test

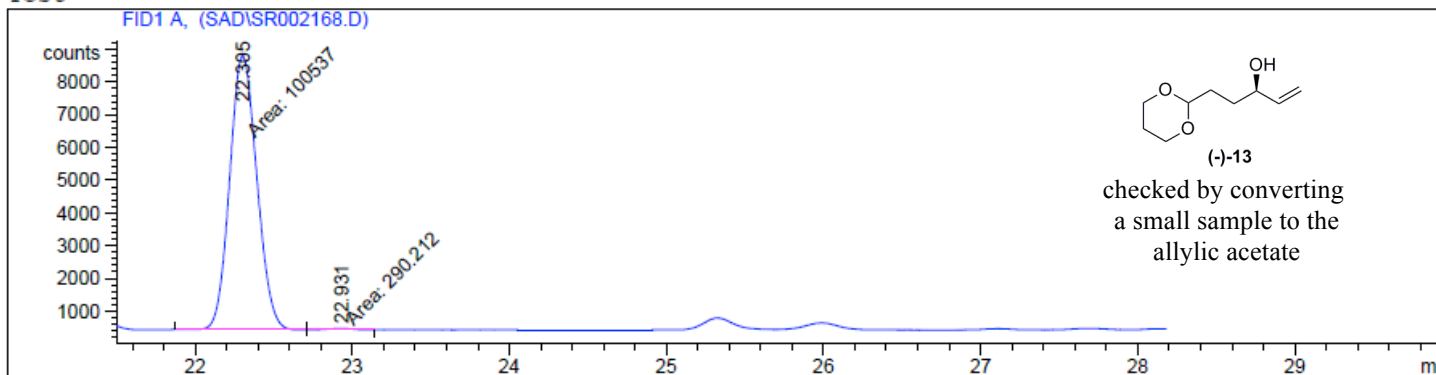

Signal 1: FID1 A,

| Peak # | RetTime [min] | Type | Width [min] | Area counts*s | Height [counts] | Area % |
|--------|---------------|------|-------------|---------------|-----------------|--------|
|--------|---------------|------|-------------|---------------|-----------------|--------|

**4*R*, 5*E*)-Methyl 4-acetoxy-6-phenylhex-5-enoate (18)**

Pulse Sequence: s2pul

Solvent: CDCl<sub>3</sub>

Ambient temperature

File: DJC-9-35-1H

INOVA-500 "sunds1"

Relax. delay 30.000 sec

Pulse 90.0 degrees

Acq. time 4.096 sec

Width 8000.0 Hz

2 repetitions

OBSERVE H1, 500.0677750 MHz

DATA PROCESSING

Line broadening 0.3 Hz

FT size 65536

Total time 4 min. 32 sec

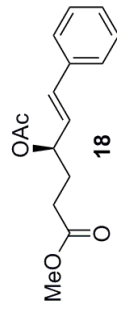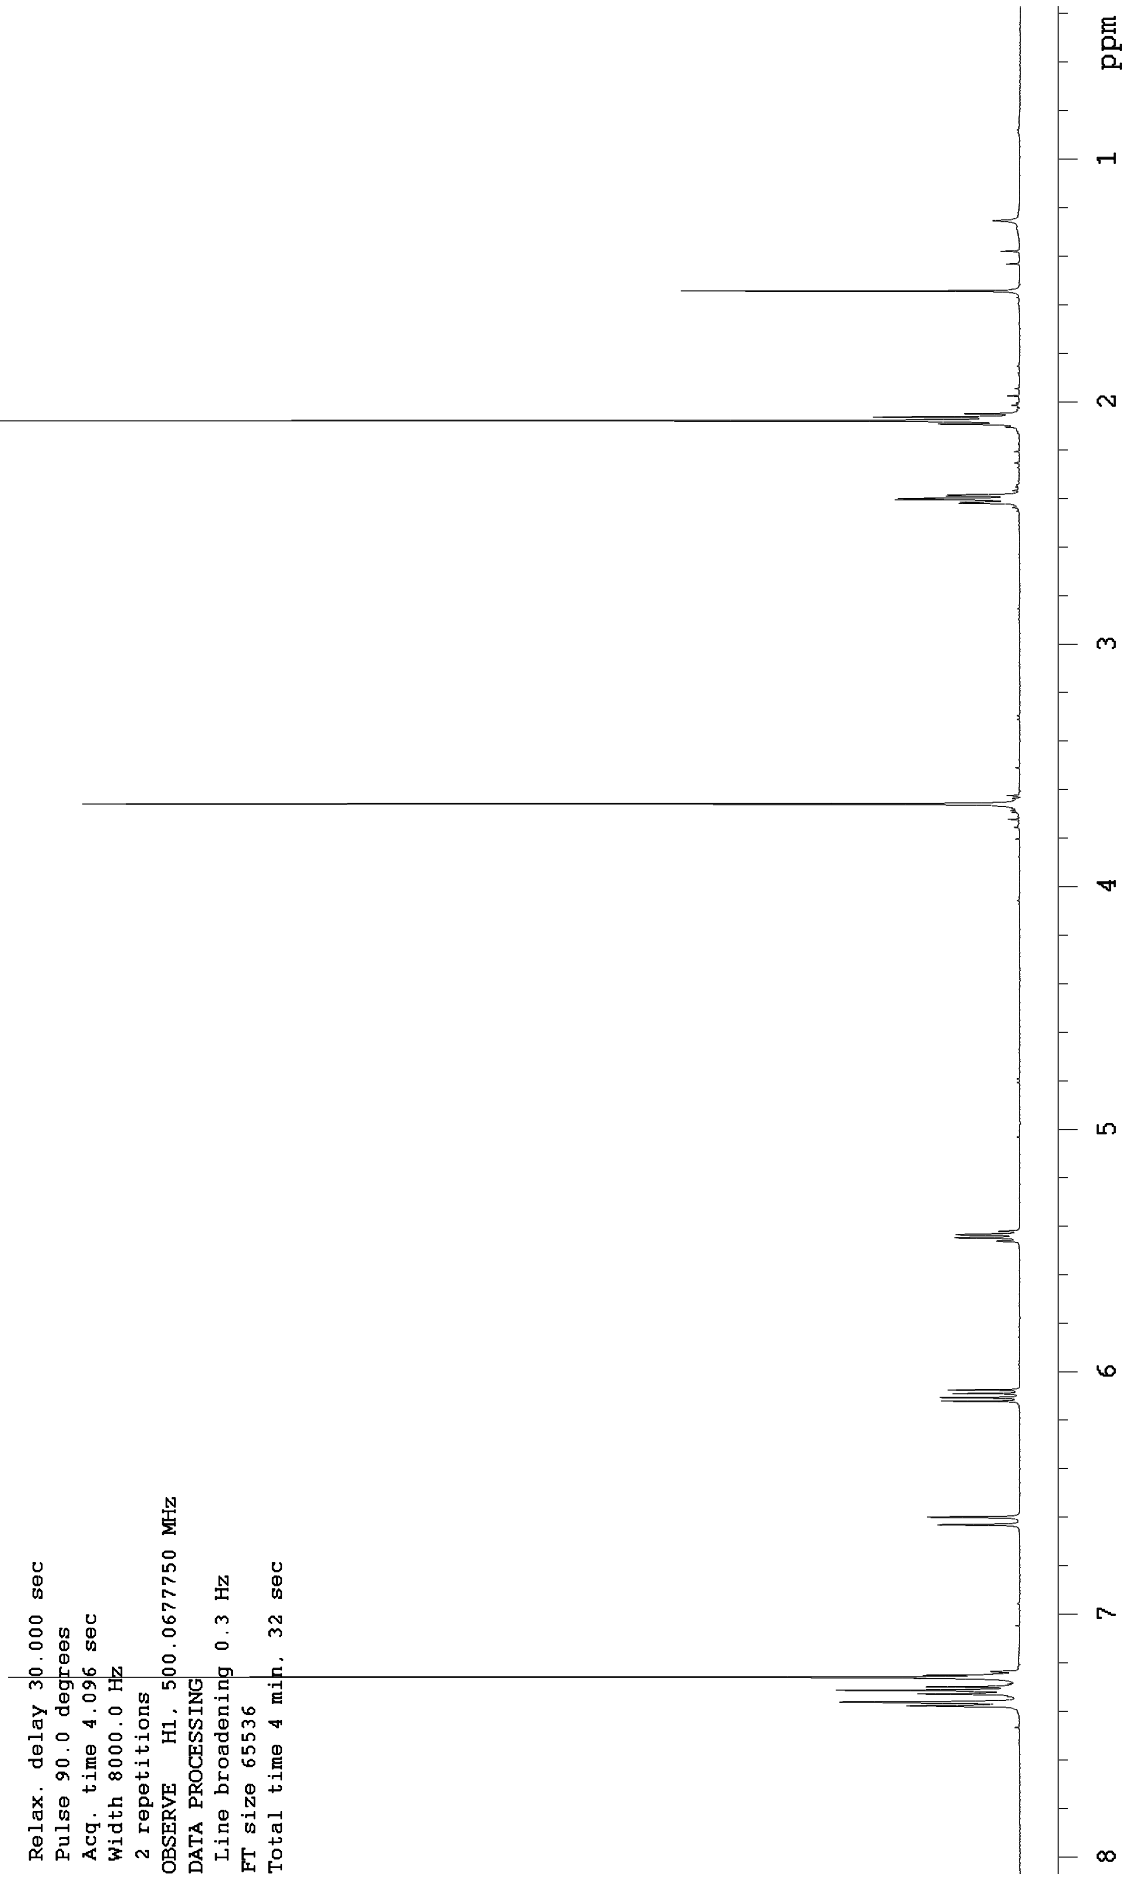

**4*R*, *E*)-Methyl 4-acetoxy-6-phenylhex-5-enoate (18)**

Pulse Sequence: s2pul

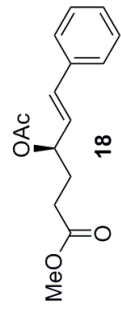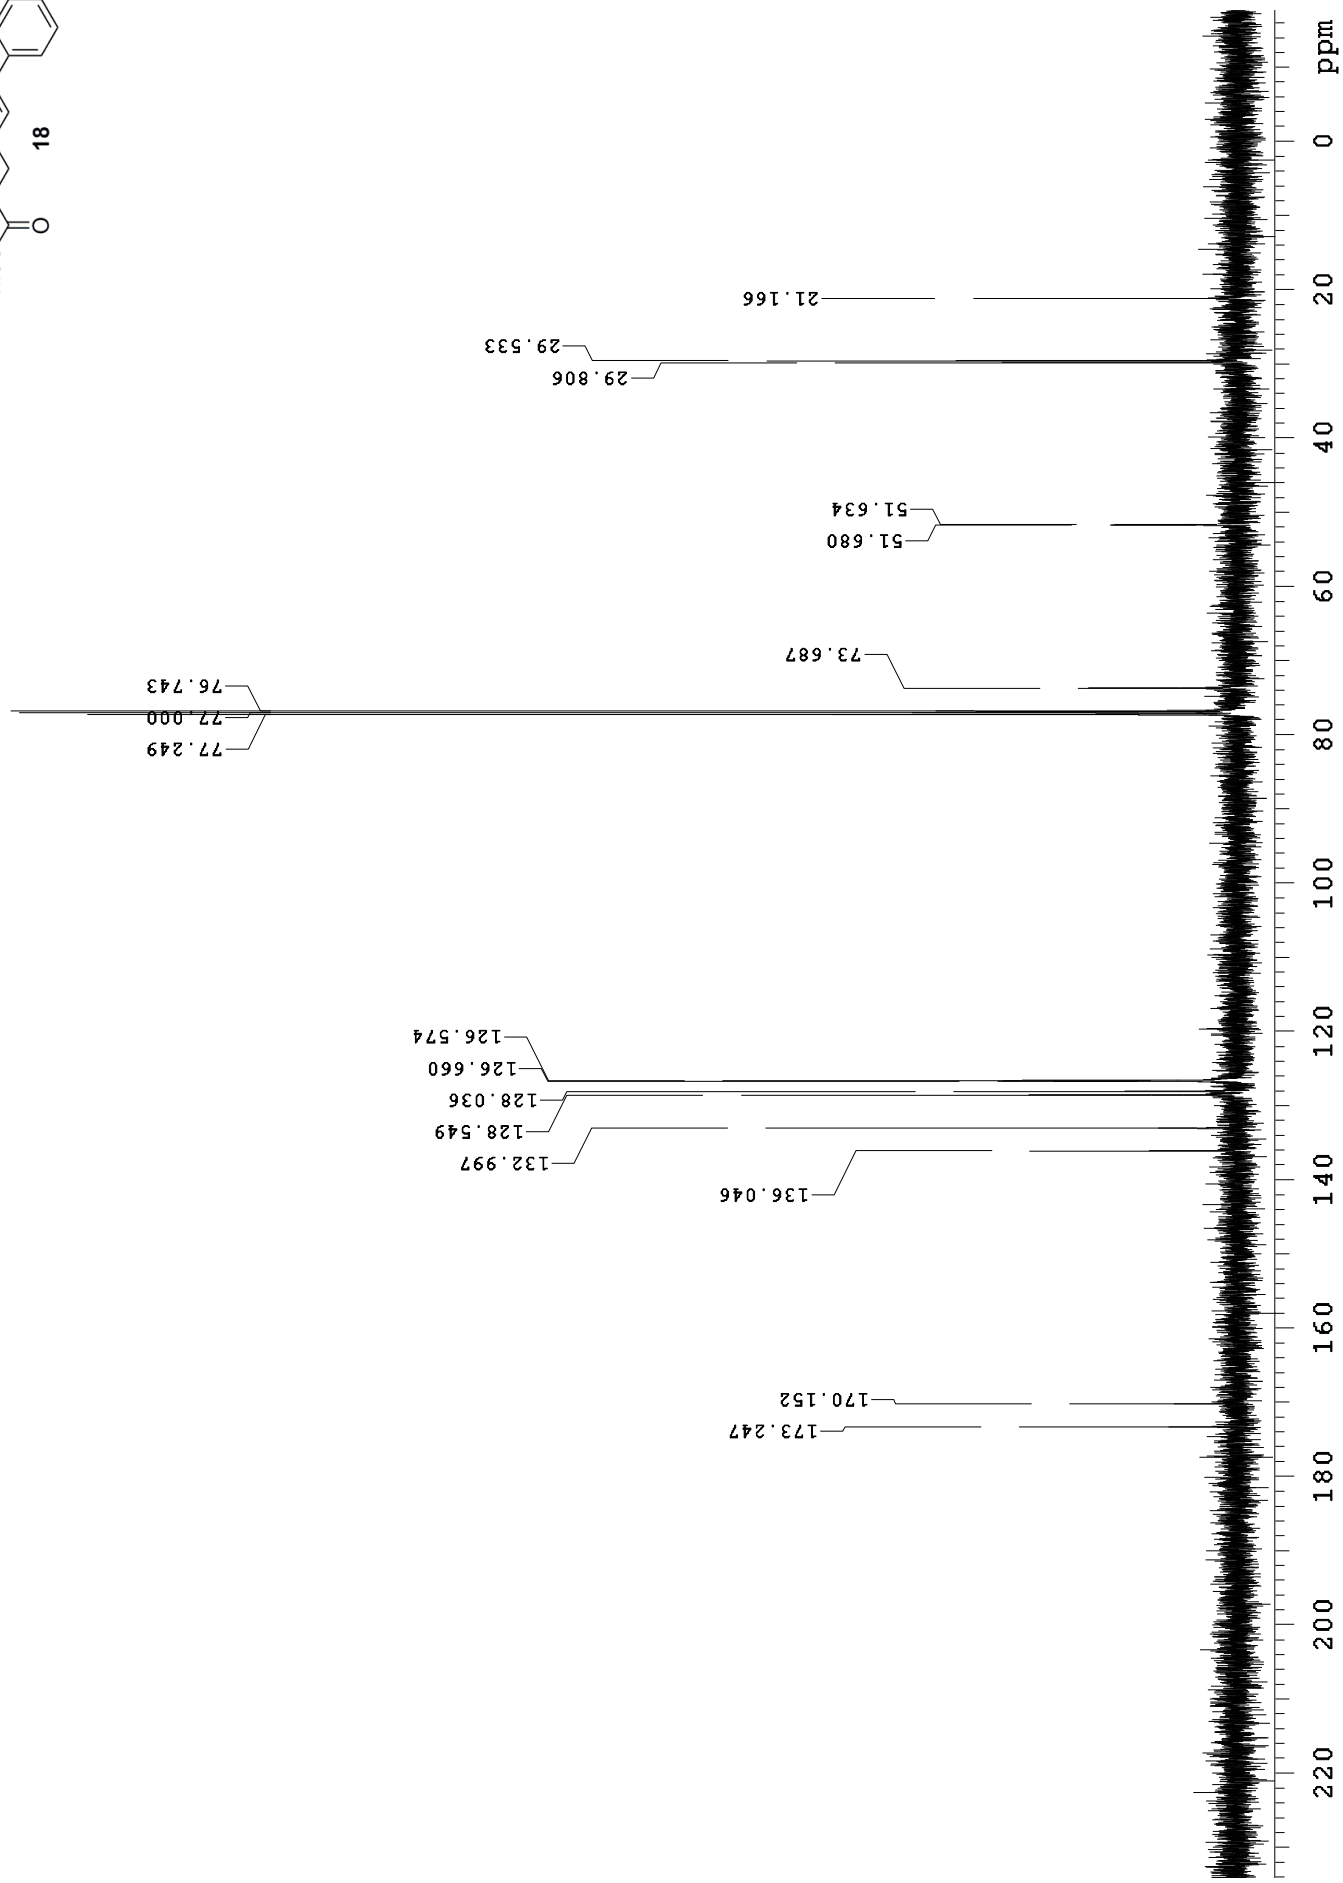



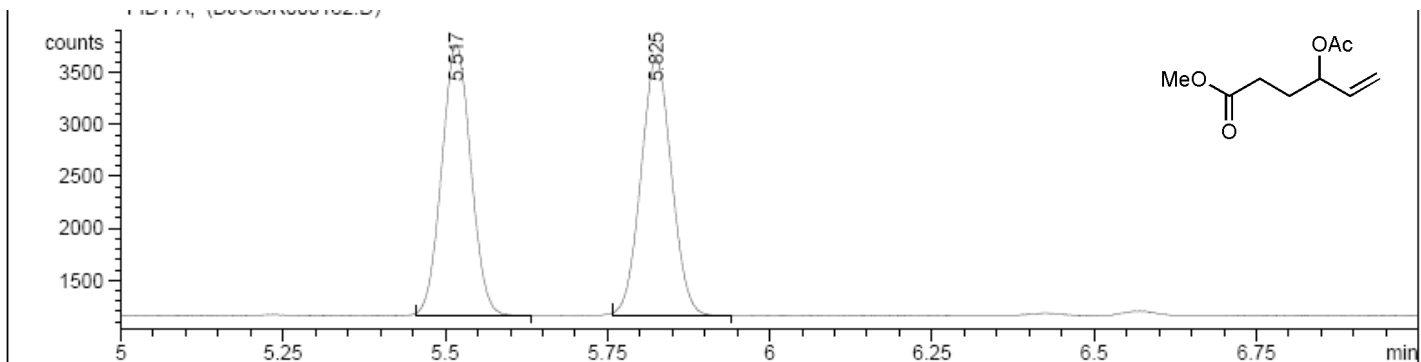

Signal 1: FID1 A,

| Peak # | RetTime [min] | Type | Width [min] | Area counts*s | Height [counts] | Area %   |
|--------|---------------|------|-------------|---------------|-----------------|----------|
| 1      | 5.517         | BB   | 0.0532      | 8113.60303    | 2543.25464      | 49.97155 |
| 2      | 5.825         | BB   | 0.0554      | 8122.84131    | 2403.16333      | 50.02845 |

Totals : 1.62364e4 4946.41797

Data File C:\HPCHEM\2\DATA\DJC\SR000183.D

Sample Name: 04-MeEst-R

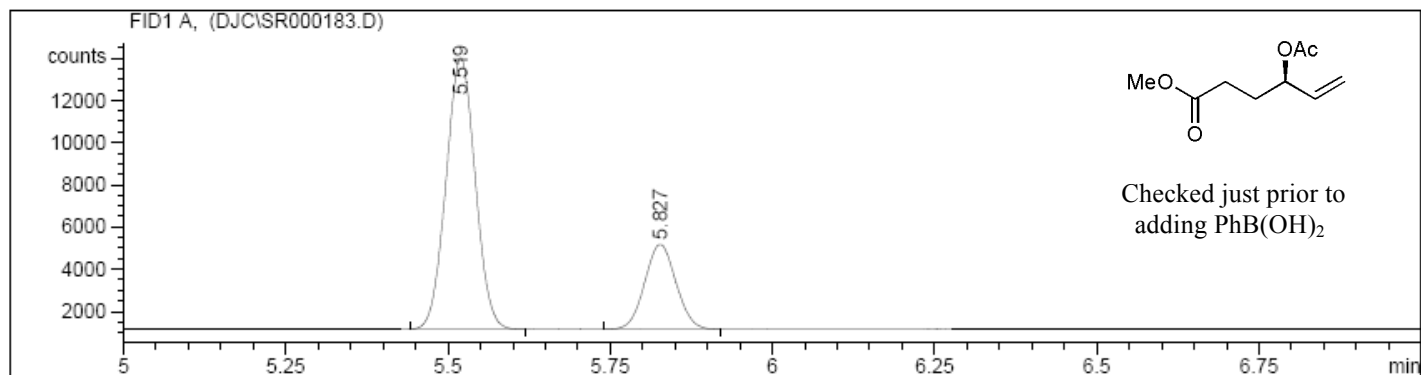

Signal 1: FID1 A,

| Peak # | RetTime [min] | Type | Width [min] | Area counts*s | Height [counts] | Area %   |
|--------|---------------|------|-------------|---------------|-----------------|----------|
| 1      | 5.519         | BB   | 0.0435      | 4.02791e4     | 1.28630e4       | 75.04569 |
| 2      | 5.827         | BB   | 0.0448      | 1.33937e4     | 4003.59375      | 24.95431 |

Totals : 5.36728e4 1.68666e4

**(R, E)-5-styrylidihydrofuran-2(3H)-one (19)**

Pulse Sequence: s2p1

Solvent: CDCl<sub>3</sub>

Ambient temperature

File: DJC-9-70-1H

INOVA-500 "sunds1"

Relax. delay 30.000 sec

Pulse 90.0 degrees

Acq. time 4.096 sec

Width 8000.0 Hz

2 repetitions

OBSERVE H1, 500.0677750 MHz

DATA PROCESSING

Line broadening 0.3 Hz

FT size 65536

Total time 4 min. 32 sec

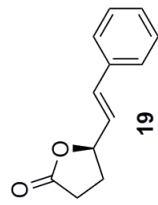

19

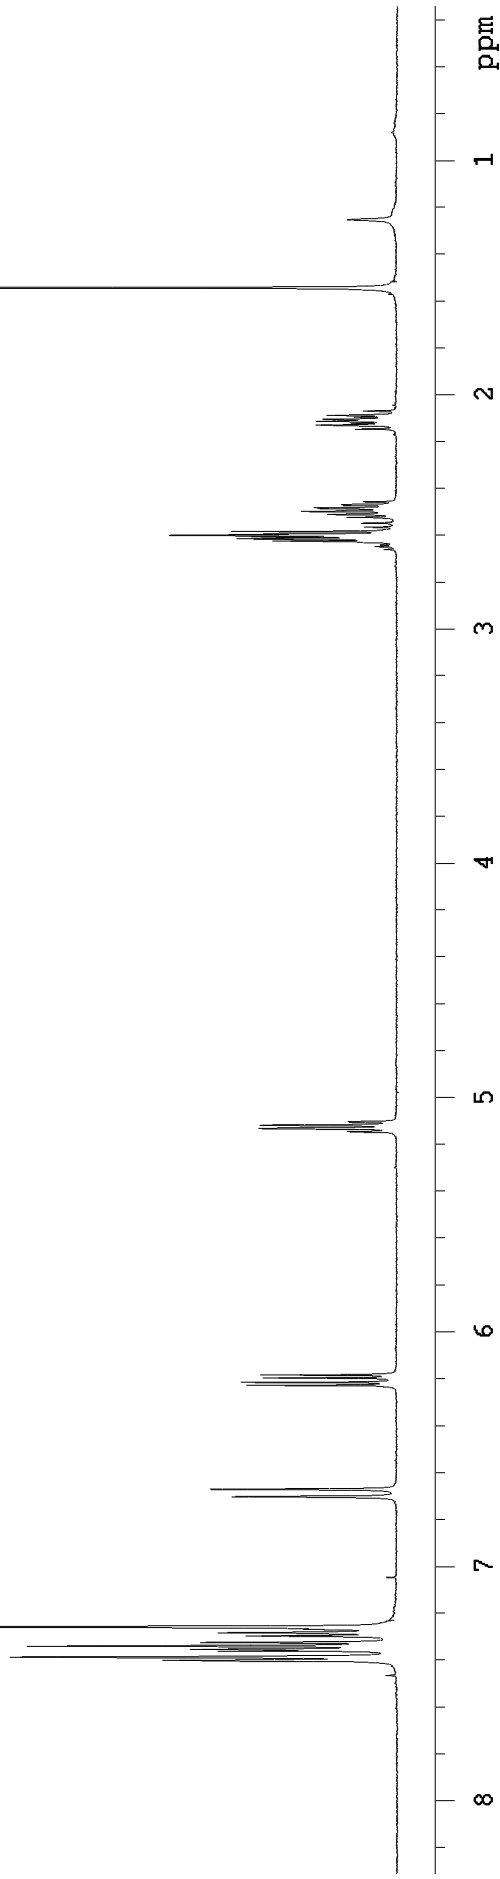

***R, E*-5-styrylidihydrofuran-2(3H)-one (19)**

Pulse Sequence: s2pul

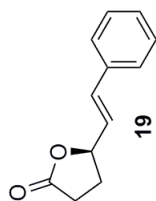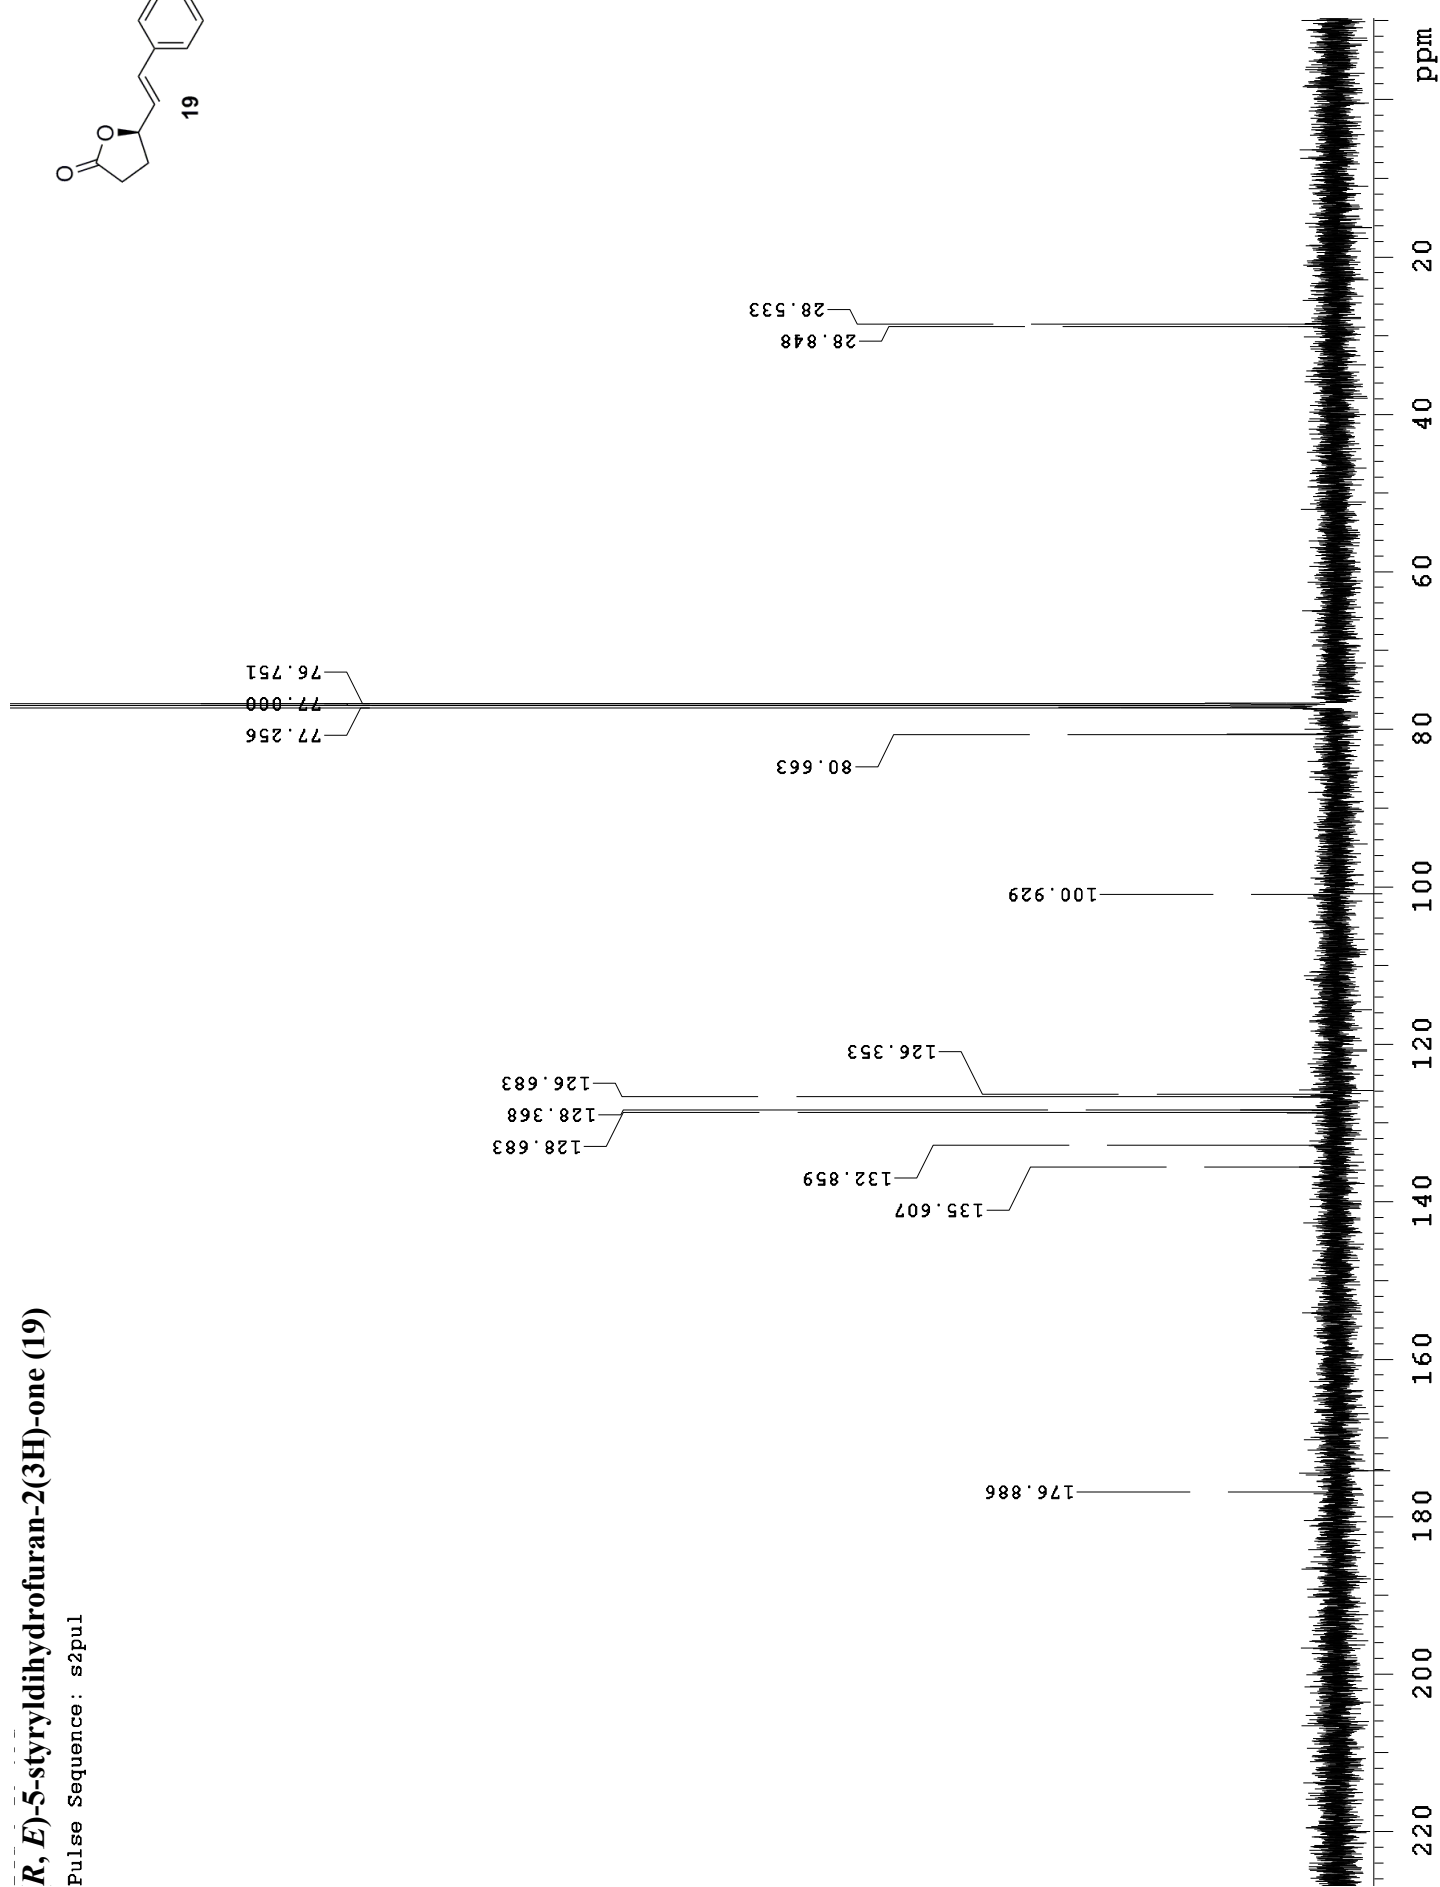

**(R)-5-((4R,5R)-2,2-dimethyl-5-phenyl-1,3-dioxolan-4-yl)dihydrofuran-2(3H)-one ((-)-20)**

Pulse Sequence: s2pul

Solvent: CDCl3

Ambient temperature

File: DJC-9-125

INOVA-500 "sunds1"

Relax. delay 15.000 sec

Pulse 90.0 degrees

Acq. time 4.096 sec

Width 8000.0 Hz

4 repetitions

OBSERVE H1, 500.0677753 MHz

DATA PROCESSING

Line broadening 0.3 Hz

FT size 65536

Total time 2 min, 32 sec

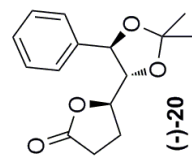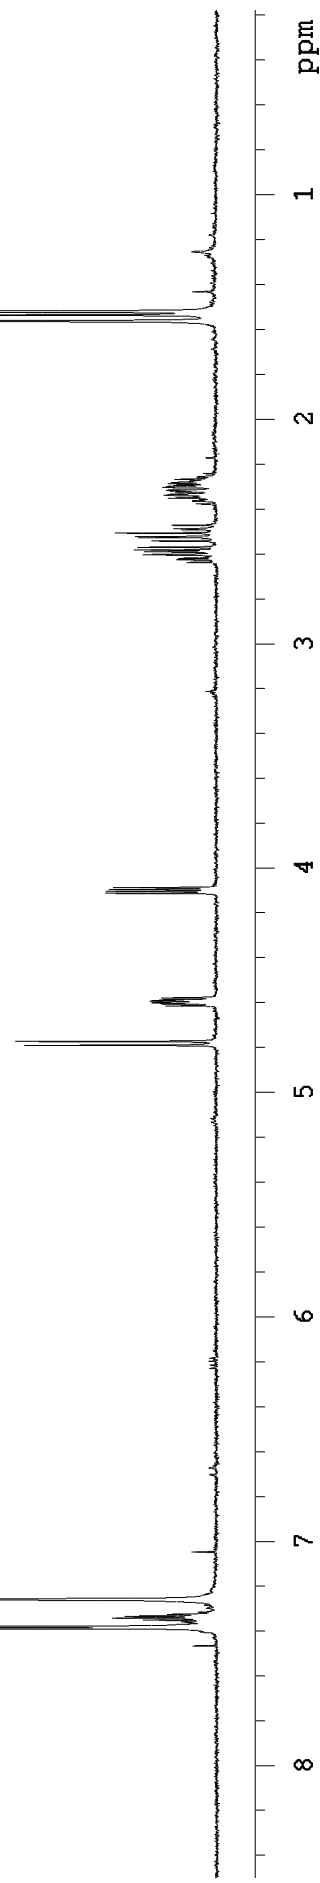

**(R)-5-((4R,5R)-2,2-dimethyl-5-phenyl-1,3-dioxolan-4-yl)dihydrofuran-2(3H)-one ((-)-20)**

Pulse Sequence: s2pul

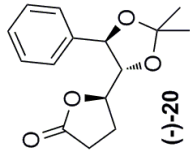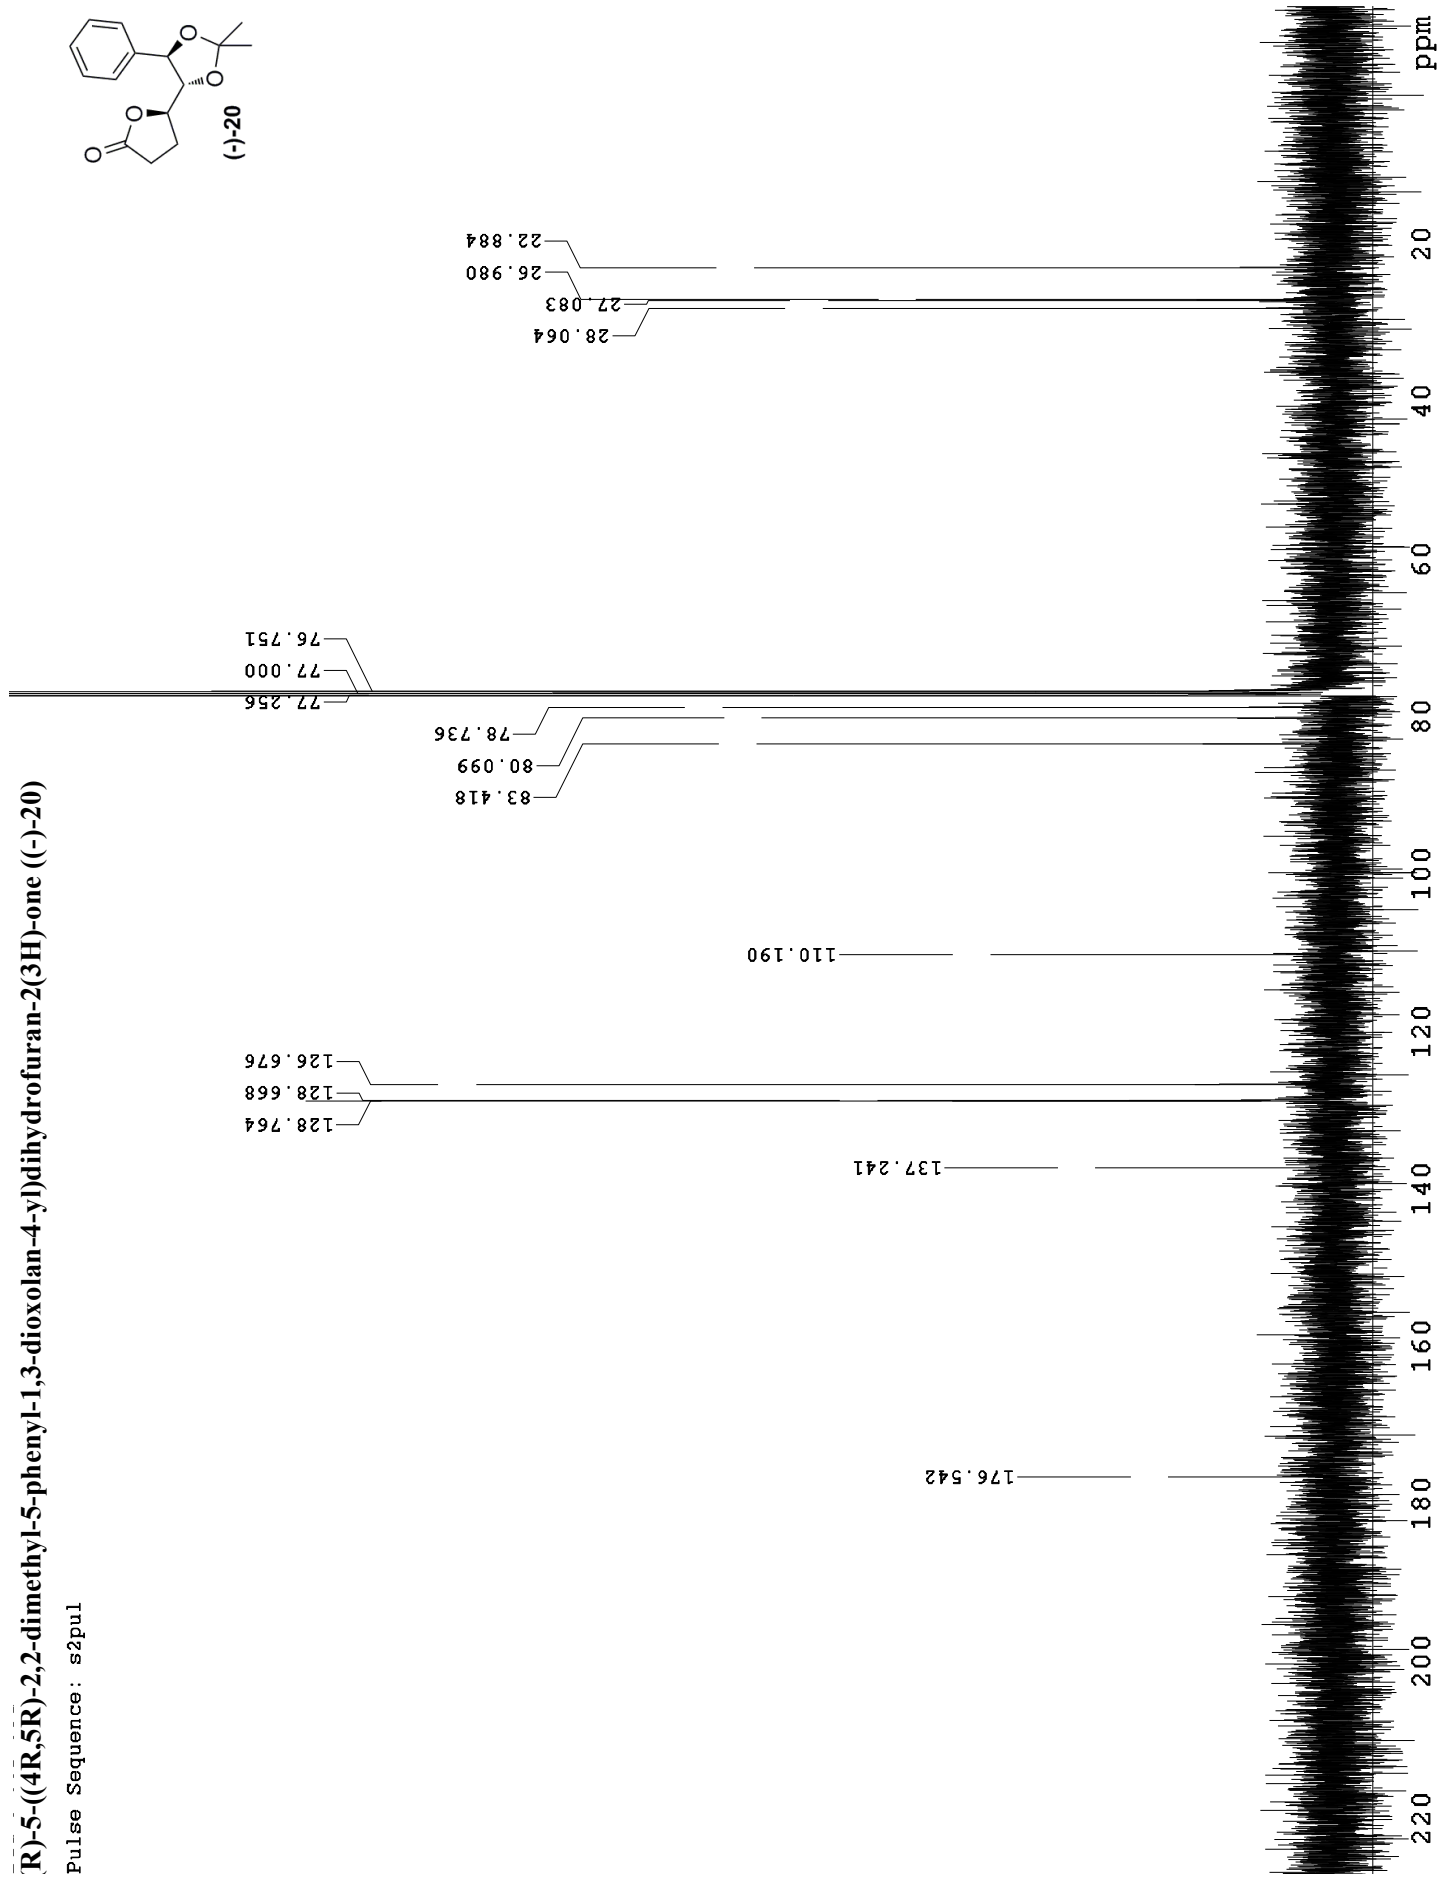

```

=====
Injection Date : 11/23/2010 8:21:02 PM      Seq. Line : 1
Sample Name    : DC-diol-rac                 Location  : Vial 33
Acq. Operator  : HPLC Host                   Inj       : 1
Acq. Instrument: Instrument 1                 Inj Volume: 0.5 µl
Sequence File  : C:\HPCHEM\1\SEQUENCE\STANDARD.S
Acq. Method    : C:\HPCHEM\1\METHODS\COLUMNS\REVERSE\CHIRAL\AD-RH\35ACCN.M
Last changed   : 11/23/2010 8:20:08 PM by HPLC Host
Analysis Method: C:\HPCHEM\1\METHODS\COLUMNS\REVERSE\CHIRAL\AD-RH\35ACCN.M
Last changed   : 11/23/2010 8:33:48 PM by HPLC Host
                (modified after loading)

```

AD-RH  
Reverse Phase Chiral  
ACCN35%

Standard Run

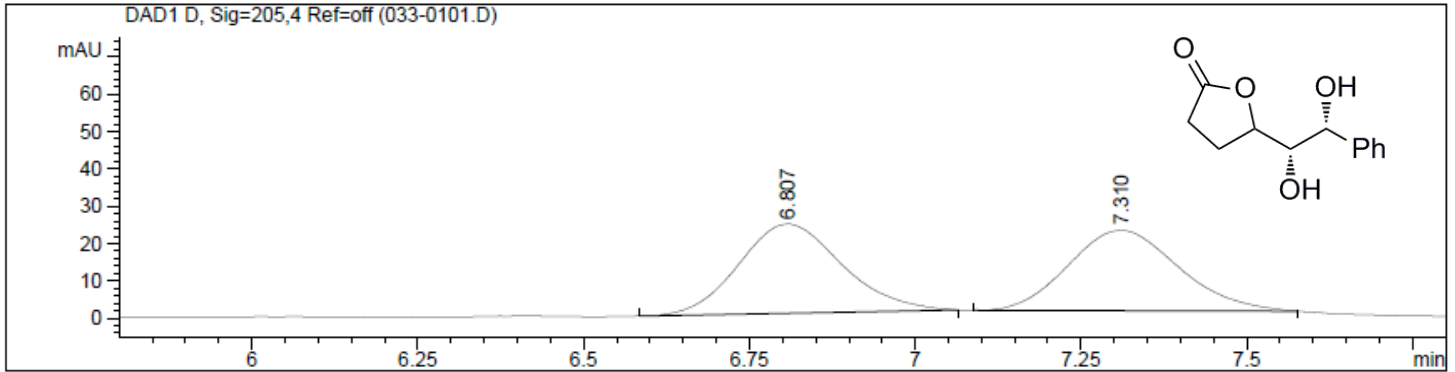

Signal 1: DAD1 D, Sig=205,4 Ref=off

| Peak # | RetTime [min] | Type | Width [min] | Area [mAU*s] | Height [mAU] | Area %  |
|--------|---------------|------|-------------|--------------|--------------|---------|
| 1      | 6.807         | BB   | 0.1665      | 258.61758    | 23.89842     | 50.9221 |
| 2      | 7.310         | BB   | 0.1793      | 249.25174    | 21.55332     | 49.0779 |

Standard Run

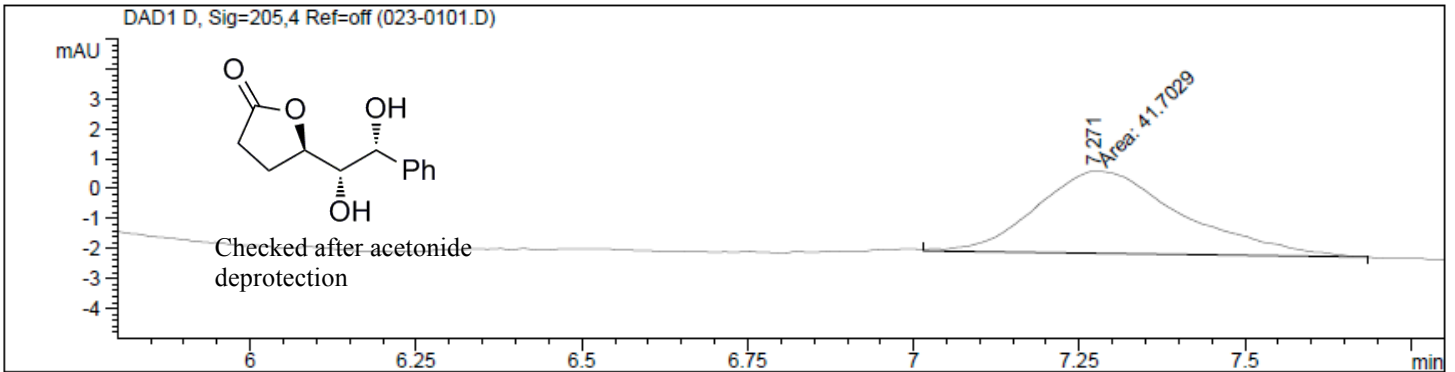

Signal 1: DAD1 D, Sig=205,4 Ref=off

| Peak # | RetTime [min] | Type | Width [min] | Area [mAU*s] | Height [mAU] | Area %   |
|--------|---------------|------|-------------|--------------|--------------|----------|
| 1      | 7.271         | MM   | 0.2538      | 41.70292     | 2.73845      | 100.0000 |

**R)-5-((4R,5R)-2,2-dimethyl-5-phenyl-1,3-dioxolan-4-yl)furan-2(5H)-one ((+)-21)**

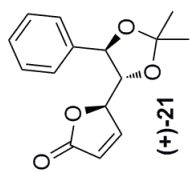

Pulse Sequence: s2pul

Solvent: CDCl3

Ambient temperature

File: DJC-9-122-1H

INOVA-500 "sundsl"

Relax. delay 15.000 sec

Pulse 90.0 degrees

Acq. time 4.096 sec

Width 8000.0 Hz

3 repetitions

OBSERVE H1, 500.0677753 MHz

DATA PROCESSING

Line broadening 0.3 Hz

FT size 65536

Total time 2 min. 32 sec

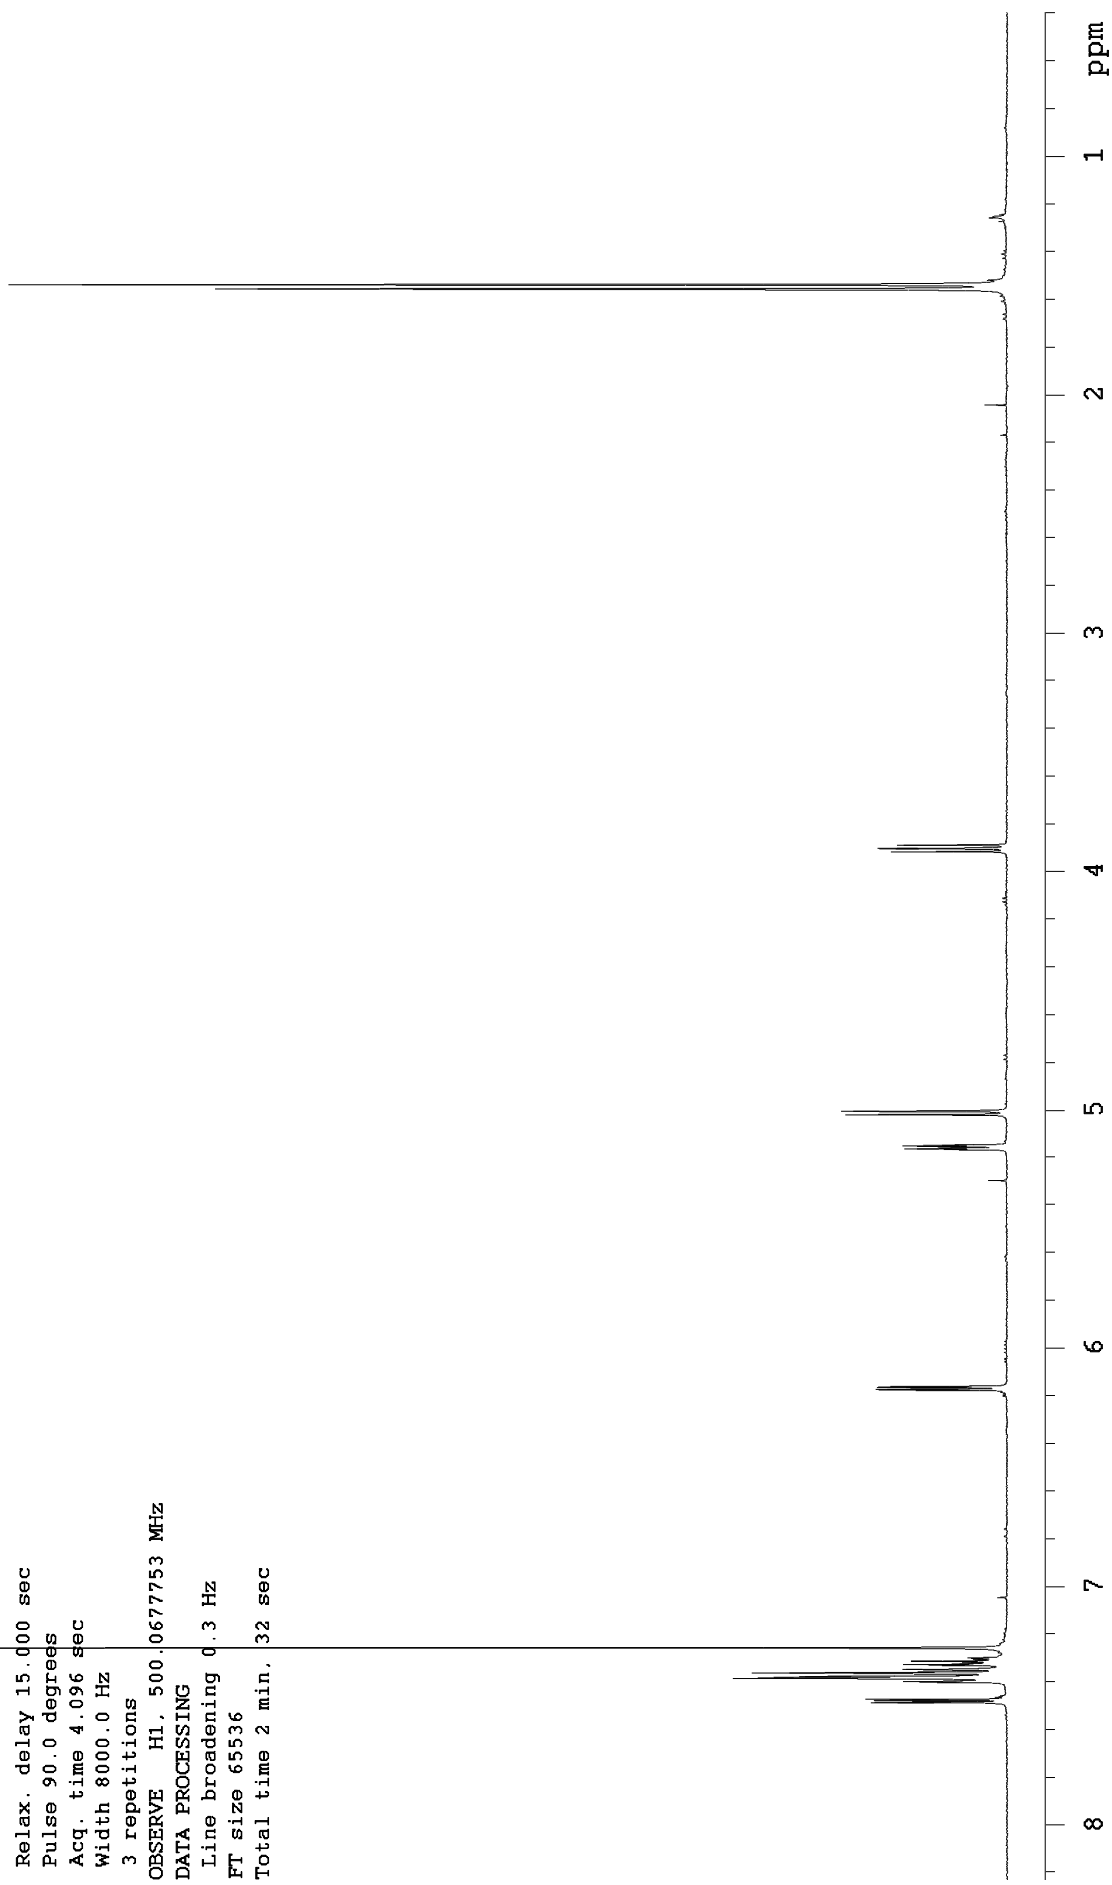

**R)-5-((4R,5R)-2,2-dimethyl-1,3-dioxolan-4-yl)furan-2(5H)-one ((+)-21)**

Pulse Sequence: s2pul

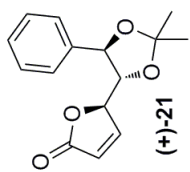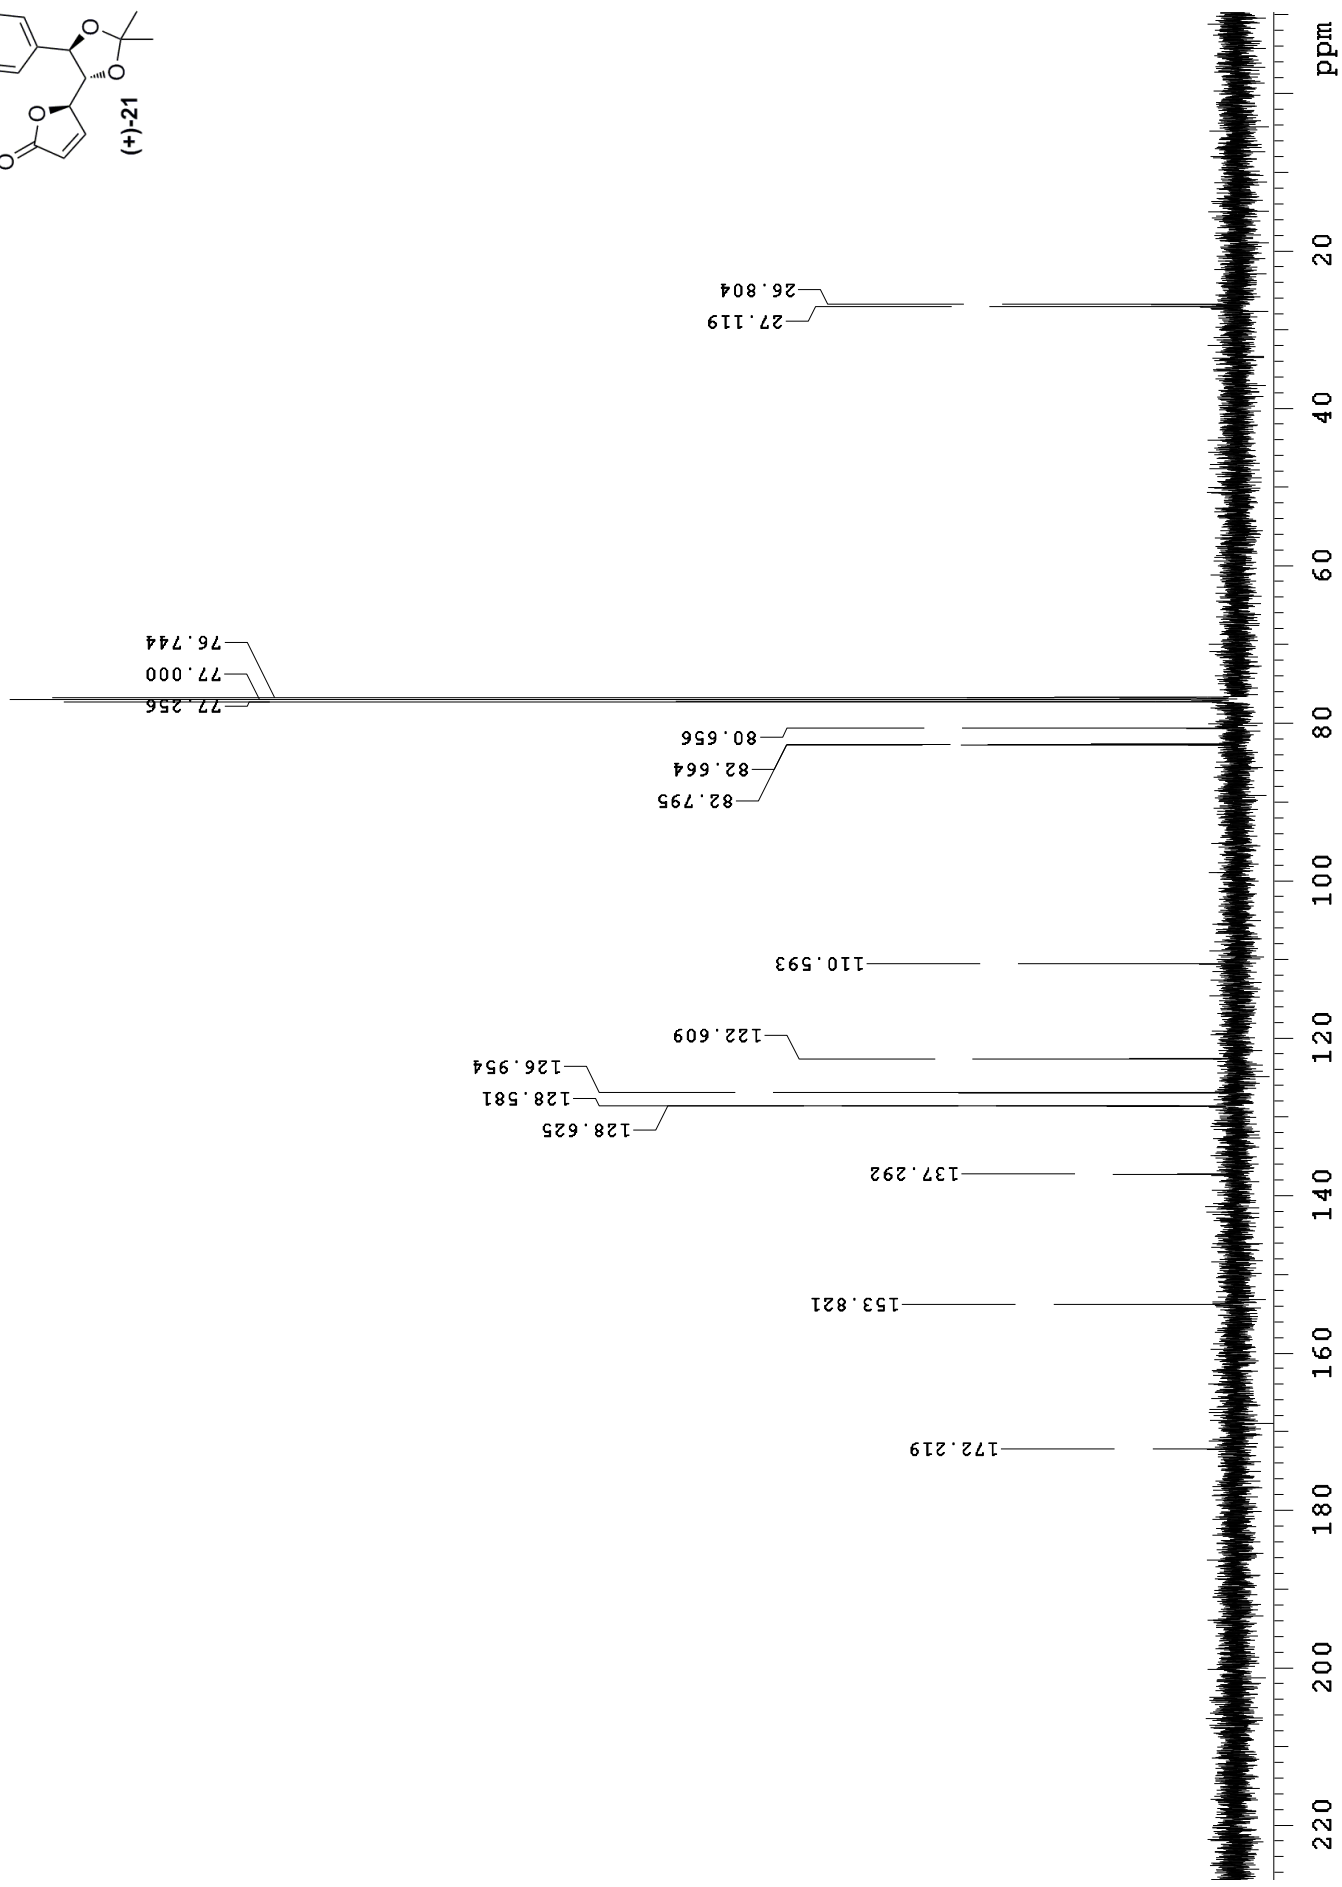



**3aS,5R,6S,6aS)-6-hydroxy-5-phenyltetrahydrofuro[3,2-b]furan-2(5H)-one((-)-22)**

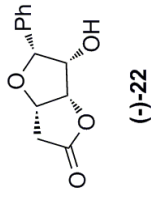

Pulse Sequence: s2pul

Solvent: CDCl3

Ambient temperature

File: DJC-9-78-2

INOVA-500 "sunds1"

Relax. delay 15.000 sec

Pulse 90.0 degrees

Acq. time 4.096 sec

Width 8000.0 Hz

7 repetitions

OBSERVE H1, 500.0677748 MHz

DATA PROCESSING

Line broadening 0.3 Hz

FT size 65536

Total time 2 min, 32 sec

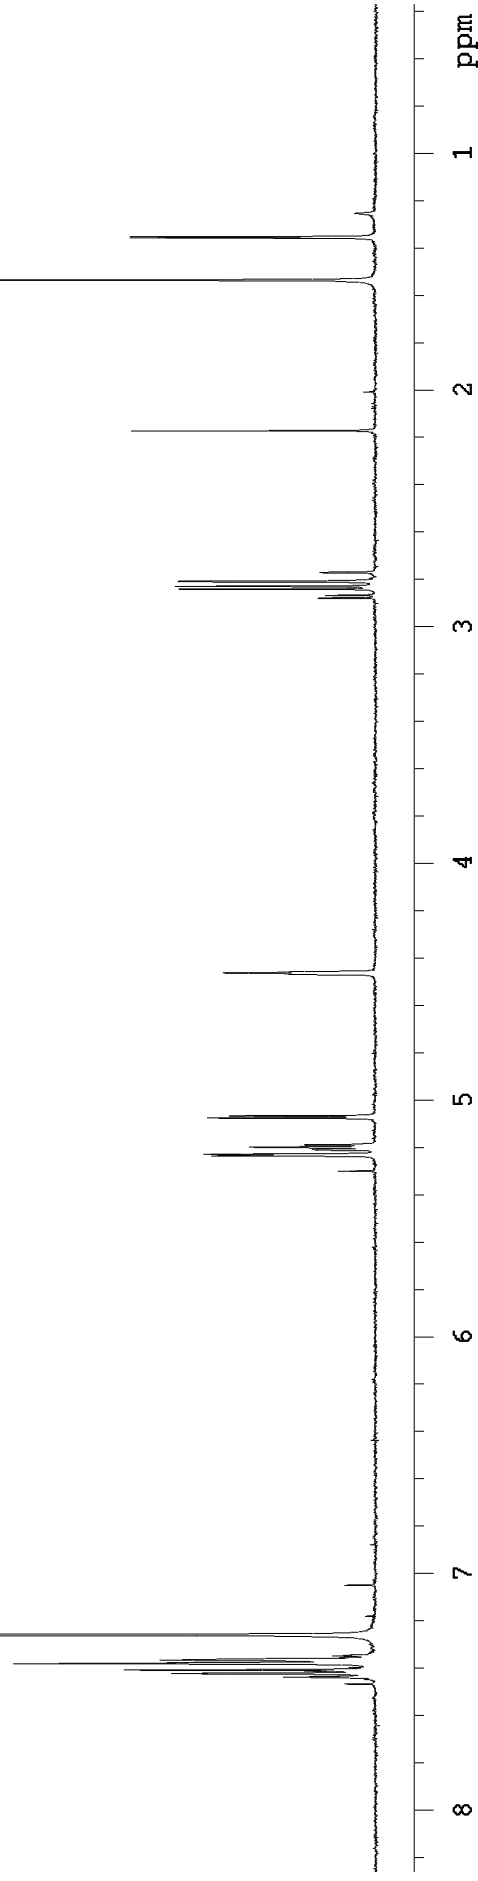

**3aS,5R,6S,6aS)-6-hydroxy-5-phenyltetrahydrofuro[3,2-b]furan-2(5H)-one((-)-22)**

Pulse Sequence: s2pul

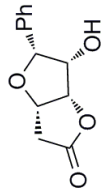

(-)-22

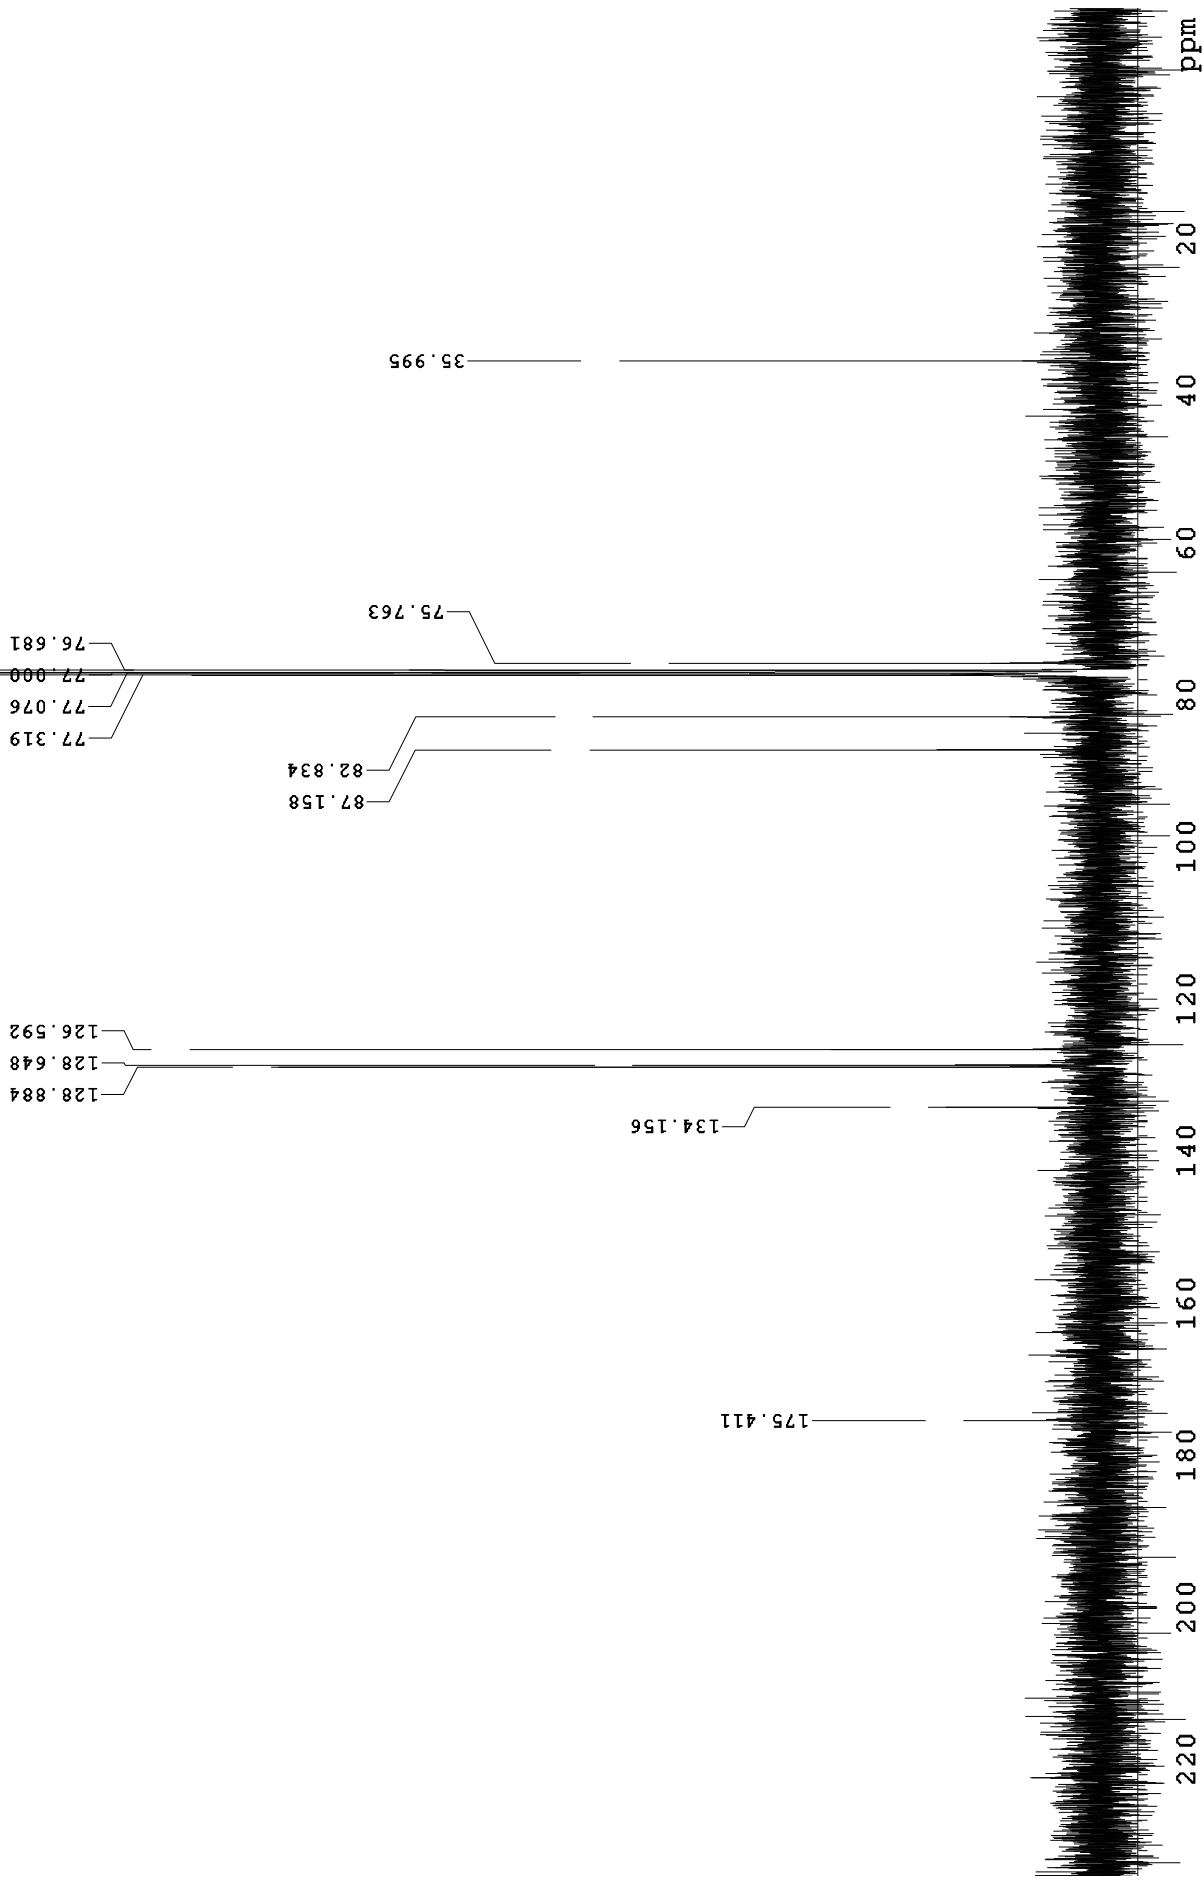

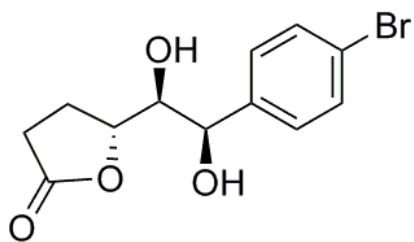

*p*-Bromophenyl- **20**-diol

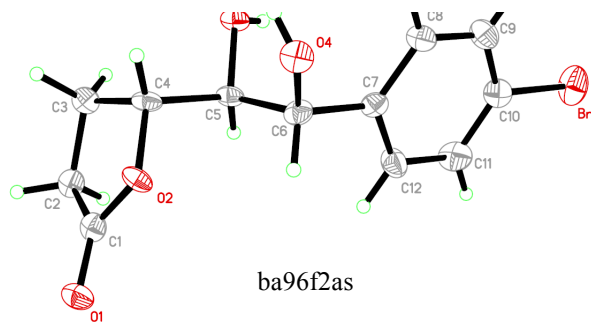

ba96f2as

|                               |               |   |
|-------------------------------|---------------|---|
| The Model has Chirality at C4 | (Verify) .... | R |
| The Model has Chirality at C5 | (Verify) .... | S |
| The Model has Chirality at C6 | (Verify) .... | R |

Table 1. Crystal data and structure refinement for ba96f2as.

|                                   |                                                   |                   |
|-----------------------------------|---------------------------------------------------|-------------------|
| Identification code               | ba96f2as                                          |                   |
| Empirical formula                 | C <sub>12</sub> H <sub>13</sub> Br O <sub>4</sub> |                   |
| Molecular weight                  | 301.13                                            |                   |
| Temperature                       | 193(2) K                                          |                   |
| Wavelength                        | 0.71073 Å                                         |                   |
| Crystal system                    | Monoclinic                                        |                   |
| Space group                       | P 21                                              |                   |
| Unit cell dimensions              | a = 10.791(2) Å                                   | α = 90°.          |
|                                   | b = 4.9772(8) Å                                   | β = 101.532(12)°. |
|                                   | c = 11.585(2) Å                                   | γ = 90°.          |
| Volume                            | 609.63(19) Å <sup>3</sup>                         |                   |
| Z                                 | 2                                                 |                   |
| Density (calculated)              | 1.640 Mg/m <sup>3</sup>                           |                   |
| Absorption coefficient (000)      | 3.371 mm <sup>-1</sup>                            |                   |
| Crystal size                      | 0.862 x 0.396 x 0.05 mm <sup>3</sup>              |                   |
| Theta range for data collection   | 1.79 to 25.31°.                                   |                   |
| Index ranges                      | -12 ≤ h ≤ 12, -5 ≤ k ≤ 5, -13 ≤ l ≤ 13            |                   |
| Reflections collected             | 8519                                              |                   |
| Independent reflections           | 2168 [R(int) = 0.0829]                            |                   |
| Completeness to theta = 25.31°    | 99.6 %                                            |                   |
| Absorption correction             | Integration                                       |                   |
| Max. and min. transmission        | 0.8408 and 0.2253                                 |                   |
| Refinement method                 | Full-matrix least-squares on F <sup>2</sup>       |                   |
| Data / restraints / parameters    | 2168 / 1 / 156                                    |                   |
| Goodness-of-fit on F <sup>2</sup> | 0.970                                             |                   |
| Final R indices [I > 2σ(I)]       | R1 = 0.0476, wR2 = 0.1055                         |                   |
| R indices (all data)              | R1 = 0.0767, wR2 = 0.1196                         |                   |
| Absolute structure parameter      | 0.054(19)                                         |                   |
| Largest diff. peak and hole       | 0.614 and -0.592 e.Å <sup>-3</sup>                |                   |

$U(\text{eq})$  is defined as one third of the trace of the orthogonalized  $U$ -tensor.

|        | x       | y         | z       | U(eq) |
|--------|---------|-----------|---------|-------|
| r(1)   | 2483(1) | 5824(2)   | -957(1) | 58(1) |
| l(1)   | 110(4)  | -3643(8)  | 6064(3) | 36(1) |
| l(2)   | 1949(3) | -3189(7)  | 5495(3) | 28(1) |
| l(3)   | 4040(3) | 1842(7)   | 4654(3) | 27(1) |
| l(4)   | 3861(4) | -3368(6)  | 3542(3) | 32(1) |
| l'(1)  | 1056(6) | -2341(11) | 6078(5) | 30(1) |
| l'(2)  | 1441(5) | 291(12)   | 6693(5) | 33(2) |
| l'(3)  | 2834(5) | 462(14)   | 6671(4) | 31(1) |
| l'(4)  | 2986(5) | -1274(11) | 5641(5) | 28(1) |
| l'(5)  | 2902(5) | 281(10)   | 4484(5) | 26(1) |
| l'(6)  | 2812(6) | -1543(12) | 3396(5) | 30(1) |
| l'(7)  | 2749(5) | 139(10)   | 2300(5) | 28(1) |
| l'(8)  | 3799(5) | 570(18)   | 1793(5) | 36(1) |
| l'(9)  | 3712(6) | 2244(13)  | 815(5)  | 38(2) |
| l'(10) | 2587(6) | 3494(12)  | 353(5)  | 37(2) |
| l'(11) | 1521(6) | 3065(14)  | 829(6)  | 44(2) |
| l'(12) | 1621(6) | 1401(12)  | 1809(5) | 39(2) |

Table 3. Bond lengths [ $\text{\AA}$ ] and angles [ $^\circ$ ] for ba96f2as.

|                  |          |
|------------------|----------|
| r(1)-C(10)       | 1.896(6) |
| l(1)-C(1)        | 1.206(7) |
| l(2)-C(1)        | 1.350(7) |
| l(2)-C(4)        | 1.454(7) |
| l(3)-C(5)        | 1.434(6) |
| l(3)-H(3C)       | 0.8400   |
| l(4)-C(6)        | 1.434(7) |
| l(4)-H(4B)       | 0.8400   |
| l'(1)-C(2)       | 1.510(8) |
| l'(2)-C(3)       | 1.511(8) |
| l'(2)-H(2A)      | 0.9900   |
| l'(2)-H(2B)      | 0.9900   |
| l'(3)-C(4)       | 1.508(8) |
| l'(3)-H(3A)      | 0.9900   |
| l'(3)-H(3B)      | 0.9900   |
| l'(4)-C(5)       | 1.535(8) |
| l'(4)-H(4A)      | 1.0000   |
| l'(5)-C(6)       | 1.541(8) |
| l'(5)-H(5A)      | 1.0000   |
| l'(6)-C(7)       | 1.511(7) |
| l'(6)-H(6A)      | 1.0000   |
| l'(7)-C(12)      | 1.386(8) |
| l'(7)-C(8)       | 1.393(7) |
| l'(8)-C(9)       | 1.394(9) |
| l'(8)-H(8A)      | 0.9500   |
| l'(9)-C(10)      | 1.374(9) |
| l'(9)-H(9A)      | 0.9500   |
| l'(10)-C(11)     | 1.387(9) |
| l'(11)-C(12)     | 1.392(8) |
| l'(11)-H(11A)    | 0.9500   |
| l'(12)-H(12A)    | 0.9500   |
| l(1)-O(2)-C(4)   | 110.3(4) |
| l(5)-O(3)-H(3C)  | 109.5    |
| l(6)-O(4)-H(4B)  | 109.5    |
| l(1)-C(1)-O(2)   | 120.8(5) |
| l(1)-C(1)-C(2)   | 128.7(5) |
| l(2)-C(1)-C(2)   | 110.6(5) |
| l'(1)-C(2)-C(3)  | 102.8(5) |
| l'(1)-C(2)-H(2A) | 111.2    |
| l'(3)-C(2)-H(2A) | 111.2    |
| l'(1)-C(2)-H(2B) | 111.2    |
| l'(3)-C(2)-H(2B) | 111.2    |
| l(2A)-C(2)-H(2B) | 109.1    |

|                    |          |
|--------------------|----------|
| '(4)-C(3)-H(3B)    | 110.9    |
| (3A)-C(3)-H(3B)    | 108.9    |
| (2)-C(4)-C(3)      | 105.3(4) |
| (2)-C(4)-C(5)      | 108.6(4) |
| '(3)-C(4)-C(5)     | 113.9(4) |
| (2)-C(4)-H(4A)     | 109.6    |
| '(3)-C(4)-H(4A)    | 109.6    |
| '(5)-C(4)-H(4A)    | 109.6    |
| (3)-C(5)-C(4)      | 104.7(4) |
| (3)-C(5)-C(6)      | 110.1(4) |
| '(4)-C(5)-C(6)     | 113.6(4) |
| (3)-C(5)-H(5A)     | 109.4    |
| '(4)-C(5)-H(5A)    | 109.4    |
| '(6)-C(5)-H(5A)    | 109.4    |
| (4)-C(6)-C(7)      | 110.7(5) |
| (4)-C(6)-C(5)      | 110.9(4) |
| '(7)-C(6)-C(5)     | 110.2(4) |
| (4)-C(6)-H(6A)     | 108.3    |
| '(7)-C(6)-H(6A)    | 108.3    |
| '(5)-C(6)-H(6A)    | 108.3    |
| '(12)-C(7)-C(8)    | 118.6(5) |
| '(12)-C(7)-C(6)    | 119.0(5) |
| '(8)-C(7)-C(6)     | 122.3(5) |
| '(7)-C(8)-C(9)     | 120.4(6) |
| '(7)-C(8)-H(8A)    | 119.8    |
| '(9)-C(8)-H(8A)    | 119.8    |
| '(10)-C(9)-C(8)    | 119.9(6) |
| '(10)-C(9)-H(9A)   | 120.1    |
| '(8)-C(9)-H(9A)    | 120.1    |
| '(9)-C(10)-C(11)   | 120.9(6) |
| '(9)-C(10)-Br(1)   | 119.7(5) |
| '(11)-C(10)-Br(1)  | 119.4(5) |
| '(10)-C(11)-C(12)  | 118.7(6) |
| '(10)-C(11)-H(11A) | 120.6    |
| '(12)-C(11)-H(11A) | 120.6    |
| '(7)-C(12)-C(11)   | 121.5(5) |
| '(7)-C(12)-H(12A)  | 119.3    |
| '(11)-C(12)-H(12A) | 119.3    |

ymmetry transformations used to generate equivalent atoms:

Table 4. Anisotropic displacement parameters ( $\text{\AA}^2 \times 10^3$ ) for ba96f2as. The anisotropic displacement factor exponent takes the form:  $-2\pi^2 [ h^2 a^{*2} U^{11} + \dots + 2 h k a^* b^* U^{12} ]$

|       | U11   | U22   | U33   | U23   | U13   | U12   |
|-------|-------|-------|-------|-------|-------|-------|
| r(1)  | 89(1) | 42(1) | 42(1) | 14(1) | 8(1)  | -5(1) |
| (1)   | 31(2) | 33(3) | 47(2) | 5(2)  | 12(2) | -5(2) |
| (2)   | 30(2) | 15(2) | 42(2) | 3(2)  | 16(2) | -5(2) |
| (3)   | 24(2) | 15(2) | 42(2) | 6(2)  | 7(2)  | -4(2) |
| (4)   | 40(2) | 12(2) | 44(2) | 4(1)  | 9(2)  | 4(2)  |
| '(1)  | 37(4) | 20(3) | 32(3) | 6(2)  | 5(3)  | 1(3)  |
| '(2)  | 39(3) | 25(4) | 34(3) | 1(2)  | 5(2)  | -1(3) |
| '(3)  | 37(3) | 16(3) | 38(3) | 5(3)  | 7(2)  | -8(3) |
| '(4)  | 18(3) | 21(3) | 46(4) | 7(2)  | 5(3)  | -3(2) |
| '(5)  | 21(3) | 18(4) | 37(3) | 4(2)  | 6(2)  | -4(2) |
| '(6)  | 26(3) | 28(3) | 35(3) | 8(2)  | -1(3) | 2(3)  |
| '(7)  | 30(3) | 19(4) | 33(3) | -2(2) | 3(2)  | -6(2) |
| '(8)  | 30(3) | 36(4) | 42(3) | 3(4)  | 9(2)  | 0(4)  |
| '(9)  | 42(4) | 33(3) | 42(4) | 5(3)  | 15(3) | 2(3)  |
| '(10) | 44(4) | 25(3) | 42(4) | -1(3) | 8(3)  | -4(3) |
| '(11) | 38(4) | 37(4) | 55(4) | 15(3) | 2(3)  | 12(3) |
| '(12) | 39(4) | 45(5) | 35(3) | 10(3) | 13(3) | 6(3)  |

|        | x    | y     | z    | U(eq) |
|--------|------|-------|------|-------|
| i(3C)  | 3905 | 3273  | 4265 | 41    |
| i(4B)  | 4492 | -2666 | 3981 | 48    |
| i(2A)  | 1299 | 268   | 7512 | 39    |
| i(2B)  | 969  | 1815  | 6264 | 39    |
| i(3A)  | 3352 | -230  | 7414 | 37    |
| i(3B)  | 3086 | 2340  | 6554 | 37    |
| i(4A)  | 3811 | -2255 | 5833 | 34    |
| i(5A)  | 2154 | 1511  | 4367 | 31    |
| i(6A)  | 2016 | -2619 | 3304 | 37    |
| i(8A)  | 4580 | -282  | 2116 | 43    |
| i(9A)  | 4429 | 2520  | 469  | 46    |
| i(11A) | 739  | 3890  | 492  | 53    |
| i(12A) | 900  | 1124  | 2149 | 47    |

Table 6. Torsion angles [°] for ba96f2as.

|                        |           |
|------------------------|-----------|
| i(4)-O(2)-C(1)-O(1)    | 179.7(5)  |
| i(4)-O(2)-C(1)-C(2)    | -0.6(6)   |
| i(1)-C(1)-C(2)-C(3)    | 164.4(6)  |
| i(2)-C(1)-C(2)-C(3)    | -15.3(6)  |
| i(1)-C(2)-C(3)-C(4)    | 24.1(6)   |
| i(1)-O(2)-C(4)-C(3)    | 16.4(6)   |
| i(1)-O(2)-C(4)-C(5)    | -105.9(5) |
| i(2)-C(3)-C(4)-O(2)    | -25.2(5)  |
| i(2)-C(3)-C(4)-C(5)    | 93.7(6)   |
| i(2)-C(4)-C(5)-O(3)    | -172.5(4) |
| i(3)-C(4)-C(5)-O(3)    | 70.4(6)   |
| i(2)-C(4)-C(5)-C(6)    | -52.4(6)  |
| i(3)-C(4)-C(5)-C(6)    | -169.4(4) |
| i(3)-C(5)-C(6)-O(4)    | 60.7(5)   |
| i(4)-C(5)-C(6)-O(4)    | -56.4(6)  |
| i(3)-C(5)-C(6)-C(7)    | -62.3(6)  |
| i(4)-C(5)-C(6)-C(7)    | -179.3(5) |
| i(4)-C(6)-C(7)-C(12)   | 160.5(5)  |
| i(5)-C(6)-C(7)-C(12)   | -76.4(7)  |
| i(4)-C(6)-C(7)-C(8)    | -22.5(7)  |
| i(5)-C(6)-C(7)-C(8)    | 100.6(6)  |
| i(12)-C(7)-C(8)-C(9)   | 0.2(10)   |
| i(6)-C(7)-C(8)-C(9)    | -176.8(6) |
| i(7)-C(8)-C(9)-C(10)   | 0.5(10)   |
| i(8)-C(9)-C(10)-C(11)  | -1.6(10)  |
| i(8)-C(9)-C(10)-Br(1)  | 178.8(5)  |
| i(9)-C(10)-C(11)-C(12) | 1.9(10)   |
| r(1)-C(10)-C(11)-C(12) | -178.4(5) |
| i(8)-C(7)-C(12)-C(11)  | 0.2(9)    |
| i(6)-C(7)-C(12)-C(11)  | 177.3(6)  |
| i(10)-C(11)-C(12)-C(7) | -1.2(10)  |

Symmetry transformations used to generate equivalent atoms:

Table 7. Hydrogen bonds for ba96f2as [Å and °].

| D-H...A             | d(D-H) | d(H...A) | d(D...A) | <(DHA) |
|---------------------|--------|----------|----------|--------|
| i(3)-H(3C)...O(4)#1 | 0.84   | 1.87     | 2.698(5) | 170.6  |
| i(4)-H(4B)...O(3)#2 | 0.84   | 2.02     | 2.759(5) | 147.0  |
| i(4)-H(4B)...O(3)   | 0.84   | 2.46     | 2.885(5) | 112.6  |

Symmetry transformations used to generate equivalent atoms:

1 x,y+1,z #2 -x+1,y-1/2,-z+1
